# Supplementary material
Source: Royal Society of Chemistry journal article supplement (doi:10.1039/d6ob00656f)
Supplement: d6ob00656f1.pdf [file d6ob00656f1.pdf]

## Supporting Information

### **Experimental and computational insights into the unexpected Type I dyotropic rearrangement within *N*-Clovanilamides synthesised via Microwave-assisted Sn<sup>II</sup>-catalysis**

Antonio Ruano-González,<sup>‡,a</sup> Ana A. Pinto,<sup>‡,a</sup> Dhionne C. Gomes,<sup>b</sup> Rosa Duran-Patrón,<sup>a,d</sup> Rosario Hernández-Galán,<sup>a,d</sup> Andrés G. Algarra,<sup>c,d</sup> Antonio J. Macías-Sánchez,<sup>a,d,\*</sup> Isidro G. Collado<sup>a,d,\*</sup>

<sup>a</sup>Departamento Química Orgánica, Facultad de Ciencias, Campus Universitario Puerto Real, Universidad de Cádiz, 11510 Puerto Real (Cádiz) Spain.

<sup>b</sup>Faculdade de Farmacia, Universidade Federal de Minas Gerais. Av. Presidente Antônio Carlos, 6627, 31270-901 - Belo Horizonte, MG – Brazil.

<sup>c</sup>Departamento de Ciencia de los Materiales e Ingeniería Metalúrgica y Química Inorgánica, Facultad de Ciencias, Campus Universitario Puerto Real, Universidad de Cádiz, 11510 Puerto Real (Cádiz) Spain.

<sup>d</sup>Instituto de Biomoléculas, Campus Universitario Puerto Real, Universidad de Cádiz. 11510 Puerto Real (Cádiz) Spain.

<sup>‡</sup>Both authors contributed equally to this work.

## Supporting Information

### Table of Contents

|                                                                                                                                                                                                                             |    |
|-----------------------------------------------------------------------------------------------------------------------------------------------------------------------------------------------------------------------------|----|
| EXPERIMENTAL SECTION.....                                                                                                                                                                                                   | 6  |
| Figure S1a. <sup>1</sup> H NMR spectrum (600 MHz) of <i>N</i> -(9 $\alpha$ -hydroxyclovan-2 $\beta$ -yl)acetamide (8) in CD <sub>3</sub> OD.....                                                                            | 6  |
| Figure S1b. <sup>13</sup> C NMR spectrum (150 MHz) of <i>N</i> -(9 $\alpha$ -hydroxyclovan-2 $\beta$ -yl)acetamide (8) in CD <sub>3</sub> OD.....                                                                           | 7  |
| Figure S2a. <sup>1</sup> H-NMR spectrum (400 MHz) of <i>N</i> -(9 $\alpha$ -hydroxyclovan-2 $\beta$ -yl)propionamide (9) in CDCl <sub>3</sub> .....                                                                         | 8  |
| Figure S2b. <sup>13</sup> C-NMR spectrum (100 MHz) of <i>N</i> -(9 $\alpha$ -hydroxyclovan-2 $\beta$ -yl)propionamide (9) in CDCl <sub>3</sub> .....                                                                        | 9  |
| Figure S3a. <sup>1</sup> H-NMR spectrum (400 MHz) of <i>N</i> -(9 $\alpha$ -hydroxyclovan-2 $\beta$ -yl)butyroamide (10) in CDCl <sub>3</sub> .....                                                                         | 10 |
| Figure S3b. <sup>13</sup> C-NMR spectrum (100 MHz) of <i>N</i> -(9 $\alpha$ -hydroxyclovan-2 $\beta$ -yl)butyroamide (10) in CDCl <sub>3</sub> .....                                                                        | 11 |
| Figure S4a. <sup>1</sup> H NMR spectrum (500 MHz) of 2,2-dimethyl- <i>N</i> -(9 $\alpha$ -hydroxyclovan-2 $\beta$ -yl)propionamide (11) in CDCl <sub>3</sub> .....                                                          | 12 |
| Figure S4b. <sup>13</sup> C NMR spectrum (125MHz) of 2,2-dimethyl- <i>N</i> -(9 $\alpha$ -hydroxyclovan-2 $\beta$ -yl)propionamide (11) in CDCl <sub>3</sub> .....                                                          | 13 |
| Figure S5a. <sup>1</sup> H NMR spectrum (500 MHz) of 2-phenyl- <i>N</i> -(9 $\alpha$ -hydroxyclovan-2 $\beta$ -yl)acetamide (12) in CDCl <sub>3</sub> .....                                                                 | 14 |
| Figure S5b. <sup>13</sup> C NMR spectrum (125 MHz) of 2-phenyl- <i>N</i> -(9 $\alpha$ -hydroxyclovan-2 $\beta$ -yl)acetamide (12) in CDCl <sub>3</sub> .....                                                                | 15 |
| Figure S6a. <sup>1</sup> H NMR spectrum (400 MHz) of <i>N</i> -(9 $\alpha$ -hydroxyclovan-2 $\beta$ -yl)benzamide (13) in CDCl <sub>3</sub> .....                                                                           | 16 |
| Figure S6b. <sup>13</sup> C NMR spectrum (100 MHz) of <i>N</i> -(9 $\alpha$ -hydroxyclovan-2 $\beta$ -yl)benzamide (13) in CDCl <sub>3</sub> .....                                                                          | 17 |
| Figure S7a. <sup>1</sup> H NMR spectrum (500 MHz) of <i>N</i> -((1 <i>S</i> ,2 <i>S</i> ,5 <i>S</i> ,8 <i>S</i> )-4,4,9-trimethyltricyclo(6.2.2.0 <sup>1,5</sup> )dodec-9-en-2-yl)acetamide (14) in CDCl <sub>3</sub> ..... | 18 |

## Supporting Information

|                                                                                                                                                                                                                                               |    |
|-----------------------------------------------------------------------------------------------------------------------------------------------------------------------------------------------------------------------------------------------|----|
| Figure S7b. $^{13}\text{C}$ NMR spectrum (125 MHz) of <i>N</i> -((1 <i>S</i> ,2 <i>S</i> ,5 <i>S</i> ,8 <i>S</i> )-4,4,9-trimethyltricyclo(6.2.2.0 <sup>1,5</sup> )dodec-9-en-2-yl)acetamide (14) in $\text{CDCl}_3$ .....                    | 19 |
| Figure S7c. $^1\text{H}$ , $^1\text{H}$ -COSY spectrum of <i>N</i> -((1 <i>S</i> ,2 <i>S</i> ,5 <i>S</i> ,8 <i>S</i> )-4,4,9-trimethyltricyclo(6.2.2.0 <sup>1,5</sup> )dodec-9-en-2-yl)acetamide (14) in $\text{CDCl}_3$ .....                | 20 |
| Figure S7d. HSQC spectrum of <i>N</i> -((1 <i>S</i> ,2 <i>S</i> ,5 <i>S</i> ,8 <i>S</i> )-4,4,9-trimethyltricyclo(6.2.2.0 <sup>1,5</sup> )dodec-9-en-2-yl)acetamide (14) $\text{CDCl}_3$ .....                                                | 21 |
| Figure S7e. HMBC spectrum of <i>N</i> -((1 <i>S</i> ,2 <i>S</i> ,5 <i>S</i> ,8 <i>S</i> )-4,4,9-trimethyltricyclo(6.2.2.0 <sup>1,5</sup> )dodec-9-en-2-yl)acetamide (14) in $\text{CDCl}_3$ .....                                             | 22 |
| Figure S7f. NOESY2D spectrum of <i>N</i> -((1 <i>S</i> ,2 <i>S</i> ,5 <i>S</i> ,8 <i>S</i> )-4,4,9-trimethyltricyclo(6.2.2.0 <sup>1,5</sup> )dodec-9-en-2-yl)acetamide (14) in $\text{CDCl}_3$ .....                                          | 23 |
| Figure S8a. $^1\text{H}$ -NMR spectrum (400 MHz) of <i>N</i> -((1 <i>S</i> ,2 <i>S</i> ,5 <i>S</i> ,8 <i>S</i> )-4,4,9-trimethyltricyclo(6.2.2.0 <sup>1,5</sup> )dodec-9-en-2-yl)propionamide (15) in $\text{CDCl}_3$ .....                   | 24 |
| Figure S8b. $^{13}\text{C}$ -NMR spectrum (100 MHz) of <i>N</i> -((1 <i>S</i> ,2 <i>S</i> ,5 <i>S</i> ,8 <i>S</i> )-4,4,9-trimethyltricyclo(6.2.2.0 <sup>1,5</sup> )dodec-9-en-2-yl)propionamida (15) in $\text{CDCl}_3$ .....                | 25 |
| Figure S9a. $^1\text{H}$ -NMR spectrum (500 MHz) of <i>N</i> -((1 <i>S</i> ,2 <i>S</i> ,5 <i>S</i> ,8 <i>S</i> )-4,4,9-trimethyltricyclo(6.2.2.0 <sup>1,5</sup> )dodec-9-en-2-yl)butiroamide (16) in $\text{CD}_3\text{OD}$ .....             | 26 |
| Figure S9b. $^{13}\text{C}$ -NMR spectrum (125 MHz) of <i>N</i> -((1 <i>S</i> ,2 <i>S</i> ,5 <i>S</i> ,8 <i>S</i> )-4,4,9-trimethyltricyclo(6.2.2.0 <sup>1,5</sup> )dodec-9-en-2-yl)butiroamide (16) in $\text{CD}_3\text{OD}$ .....          | 27 |
| Figure S10a. $^1\text{H}$ -NMR spectrum (400 MHz) of 2,2-dimethyl- <i>N</i> -((1 <i>S</i> ,2 <i>S</i> ,5 <i>S</i> ,8 <i>S</i> )-4,4,9-trimethyltricyclo(6.2.2.0 <sup>1,5</sup> )dodec-9-en-2-yl)propionamide (17) in $\text{CDCl}_3$ .....    | 28 |
| Figure S10b. $^{13}\text{C}$ -NMR spectrum (100 MHz) of 2,2-dimethyl- <i>N</i> -((1 <i>S</i> ,2 <i>S</i> ,5 <i>S</i> ,8 <i>S</i> )-4,4,9-trimethyltricyclo(6.2.2.0 <sup>1,5</sup> )dodec-9-en-2-yl)propionamide (17) in $\text{CDCl}_3$ ..... | 29 |
| Figure S11a. $^1\text{H}$ -NMR spectrum(400 MHz) of 2-phenyl- <i>N</i> -((1 <i>S</i> ,2 <i>S</i> ,5 <i>S</i> ,8 <i>S</i> )-4,4,9-trimethyltricyclo(6.2.2.0 <sup>1,5</sup> )dodec-9-en-2-yl)acetamide (18) in $\text{CD}_3\text{OD}$ .....     | 30 |
| Figure S11b. $^{13}\text{C}$ -NMR spectrum(100 MHz) of 2-phenyl- <i>N</i> -((1 <i>S</i> ,2 <i>S</i> ,5 <i>S</i> ,8 <i>S</i> )-4,4,9-trimethyltricyclo(6.2.2.0 <sup>1,5</sup> )dodec-9-en-2-yl)acetamide (18) in $\text{CD}_3\text{OD}$ .....  | 31 |
| Figure S12a. $^1\text{H}$ - NMR spectrum (\$00 MHz) of <i>N</i> -((1 <i>S</i> ,2 <i>S</i> ,5 <i>S</i> ,8 <i>S</i> )-4,4,9-trimethyltricyclo(6.2.2.0 <sup>1,5</sup> )dodec-9-en-2-yl)benzamide (19) in $\text{CDCl}_3$ .....                   | 32 |
| Figure S12b. $^{13}\text{C}$ -NMR spectrum (100 MHz) of <i>N</i> -((1 <i>S</i> ,2 <i>S</i> ,5 <i>S</i> ,8 <i>S</i> )-4,4,9-trimethyltricyclo(6.2.2.0 <sup>1,5</sup> )dodec-9-en-2-yl)benzamide (19) in $\text{CDCl}_3$ .....                  | 33 |

## Supporting Information

|                                                                                                                                                                                                                                                                                                                             |    |
|-----------------------------------------------------------------------------------------------------------------------------------------------------------------------------------------------------------------------------------------------------------------------------------------------------------------------------|----|
| Figure S13a. <sup>1</sup> H NMR spectrum (500 MHz) of <i>N</i> -(9 $\alpha$ -bromoclovan-2 $\beta$ -yl)acetamide (20) in CDCl <sub>3</sub> .....                                                                                                                                                                            | 34 |
| Figure S13b. <sup>13</sup> C NMR spectrum (125 MHz) of <i>N</i> -(9 $\alpha$ -bromoclovan-2 $\beta$ -yl)acetamide (20) in CDCl <sub>3</sub> .....                                                                                                                                                                           | 35 |
| Figure S13c. <sup>1</sup> H, <sup>1</sup> H-COSY spectrum of <i>N</i> -(9 $\alpha$ -bromoclovan-2 $\beta$ -yl)acetamide (20) in CDCl <sub>3</sub> . ....                                                                                                                                                                    | 36 |
| Figure S13d. HSQC spectrum of <i>N</i> -(9 $\alpha$ -bromoclovan-2 $\beta$ -yl)acetamide (20) in CDCl <sub>3</sub> . ....                                                                                                                                                                                                   | 37 |
| Figure S13e. HMBC spectrum of <i>N</i> -(9 $\alpha$ -bromoclovan-2 $\beta$ -yl)acetamide (20) in CDCl <sub>3</sub> . ....                                                                                                                                                                                                   | 38 |
| Figure S13f. NOESY2D spectrum of <i>N</i> -(9 $\alpha$ -bromoclovan-2 $\beta$ -yl)acetamide (20) in CDCl <sub>3</sub> . Selected NOESY2D correlations for compound 20 .....                                                                                                                                                 | 39 |
| Table S1. <sup>1</sup> H-NMR spectroscopic data of compounds 8-13.....                                                                                                                                                                                                                                                      | 40 |
| Table S2. <sup>13</sup> C-NMR spectroscopic data of compounds 8-13. ....                                                                                                                                                                                                                                                    | 41 |
| Table S3. <sup>1</sup> H-NMR spectroscopic data of compounds 14-19.....                                                                                                                                                                                                                                                     | 42 |
| Table S4. <sup>13</sup> C-NMR spectroscopic data of compounds 14-19. ....                                                                                                                                                                                                                                                   | 43 |
| Table S5. Microwave methods for amide preparation. ....                                                                                                                                                                                                                                                                     | 44 |
| COMPUTATIONAL SECTION.....                                                                                                                                                                                                                                                                                                  | 46 |
| Table S6. Results of the functional, basis set, and solvent tests on the relative free energy (kcal mol <sup>-1</sup> ) of the possible isomers of compound 20. ....                                                                                                                                                        | 46 |
| Table S7. Computational analysis of the solvent effects on the relative free energy (kcal mol <sup>-1</sup> ) of the ion pair formed between 22 <sup>+</sup> and Br <sup>-</sup> .....                                                                                                                                      | 47 |
| Table S8. QTAIM topological properties of selected bond critical points (bcp) of TS <sub>d<sub>yo</sub></sub> <sup>a</sup> .....                                                                                                                                                                                            | 47 |
| Figure S14. Optimisation (M06-2X/6-311g(d,p), SMD(acetone)) trajectory from the secondary carbocation guess structure labelled as 21 <sup>+</sup> in Scheme 3, into the optimised structure of the tertiary carbocation 22 <sup>+</sup> . For simplicity, some of the substituents were removed in the representations..... | 48 |

## Supporting Information

|                                                                                                                                                                                                                                                                                                                                                              |    |
|--------------------------------------------------------------------------------------------------------------------------------------------------------------------------------------------------------------------------------------------------------------------------------------------------------------------------------------------------------------|----|
| Figure S15. Relaxed scan (M06-2X/6-311g(d,p), SMD(acetone)) along the C7-C9 coordinate in carbocation 22 <sup>+</sup> . This graph is analogous to that included in Figure 2 of the manuscript, but herein absolute energies were employed. For simplicity, some of the substituents were removed in the representations. ....                               | 55 |
| Figure S16. For transition state TS <sub>dyo</sub> (reaction coordinate = 0) and the 9 previous and subsequent steps along the intrinsic reaction coordinate, evolution of (a) C7-C8 and C7-C9 distances, (b) Br-C8 and Br-C9 distances, (c) relative energy with respect to that of TS <sub>dyo</sub> , (d) computed NBO charge of the bromide center. .... | 60 |
| Figure S17. Optimized structure of the exocyclic isomer of 14. ....                                                                                                                                                                                                                                                                                          | 61 |
| Cartesian coordinates and energetic data (a.u.) of the optimized species. ....                                                                                                                                                                                                                                                                               | 62 |

## Supporting Information

### EXPERIMENTAL SECTION

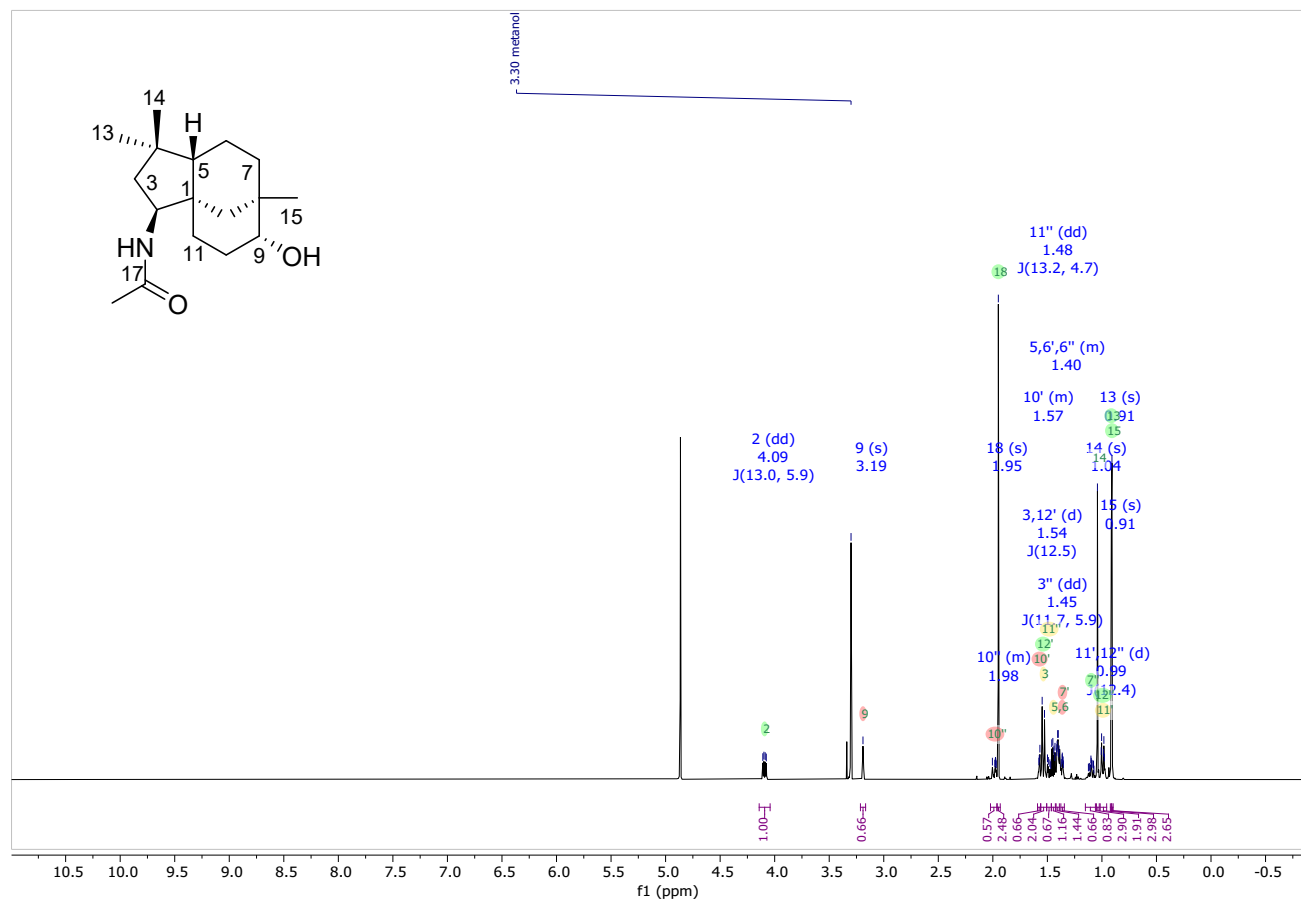

Figure S1a. <sup>1</sup>H NMR spectrum (600 MHz) of N-(9α-hydroxycyclovan-2β-yl)acetamide (8) in CD<sub>3</sub>OD.

## Supporting Information

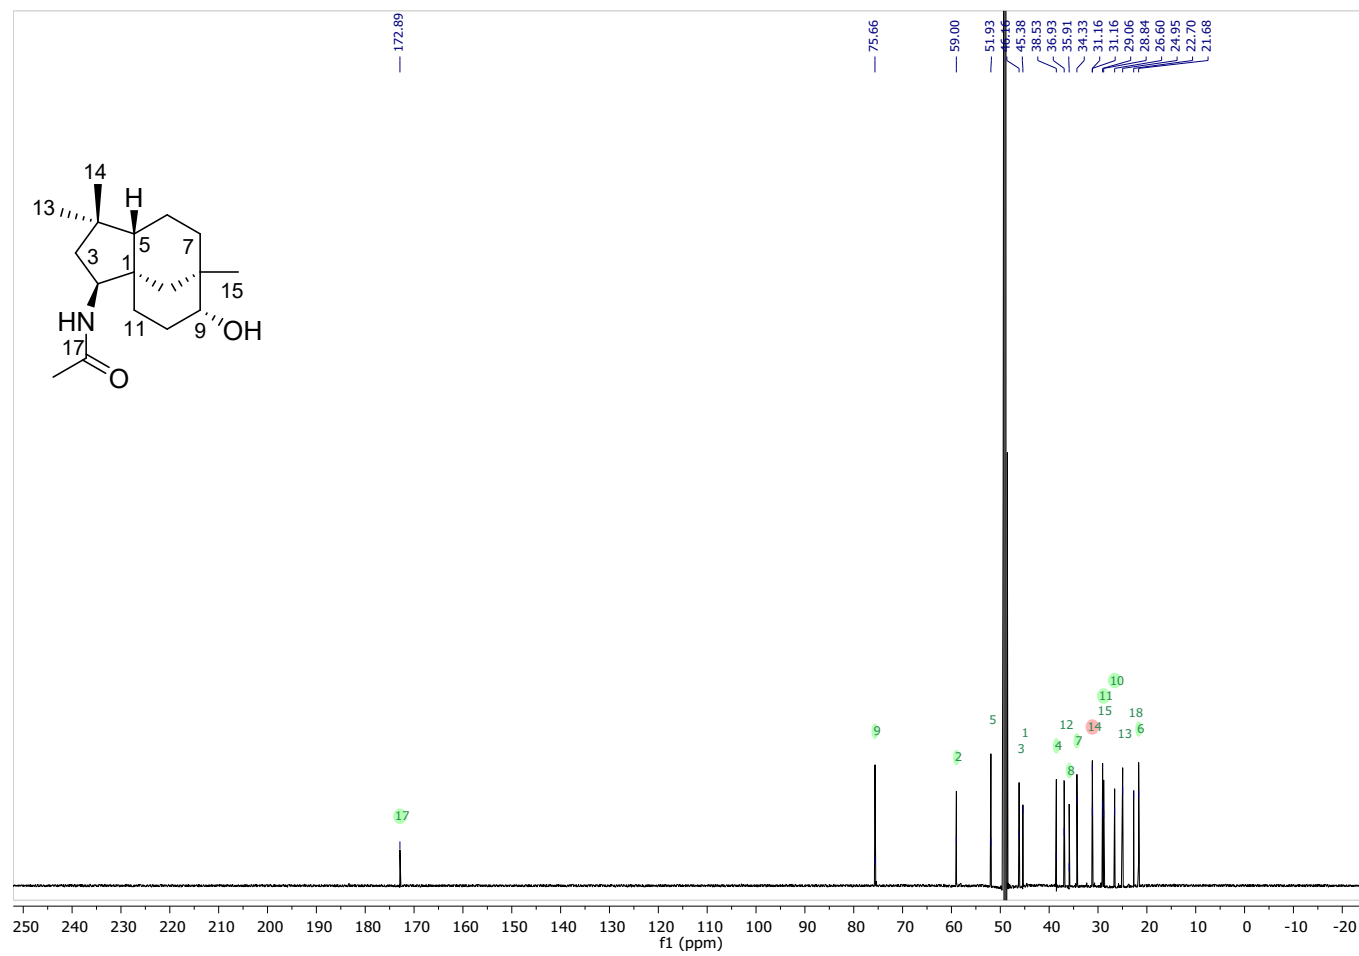

Figure S1b. <sup>13</sup>C NMR spectrum (150 MHz) of N-(9α-hydroxycyclovan-2β-yl)acetamide (8) in CD<sub>3</sub>OD.

## Supporting Information

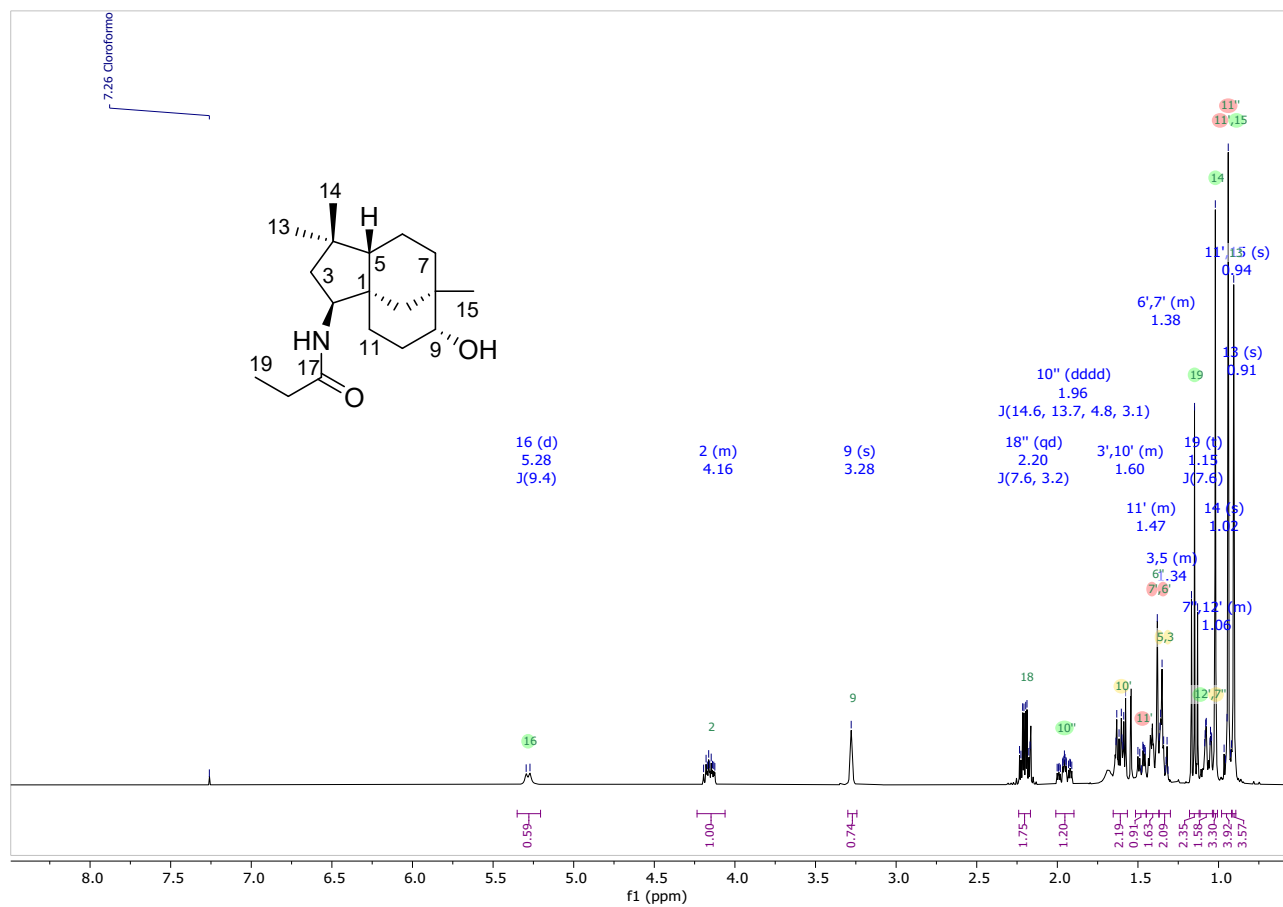

**Figure S2a.** <sup>1</sup>H-NMR spectrum (400 MHz) of N-(9α-hydroxycyclovan-2β-yl)propionamide (9) in CDCl<sub>3</sub>.

## Supporting Information

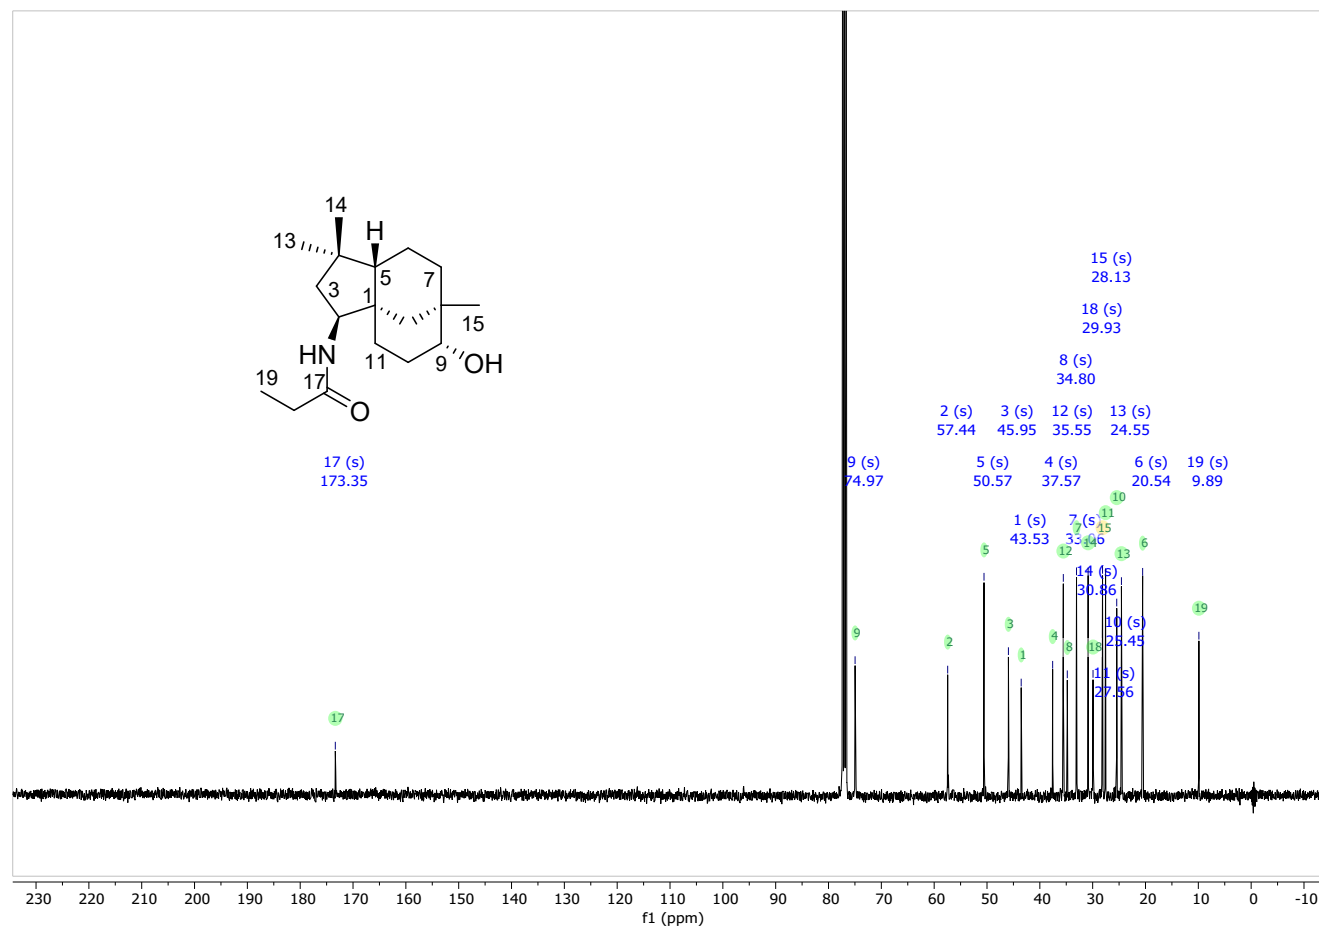

**Figure S2b.** <sup>13</sup>C-NMR spectrum (100 MHz) of N-(9a-hydroxycyclovan-2β-yl)propionamide (9) in CDCl<sub>3</sub>.

## Supporting Information

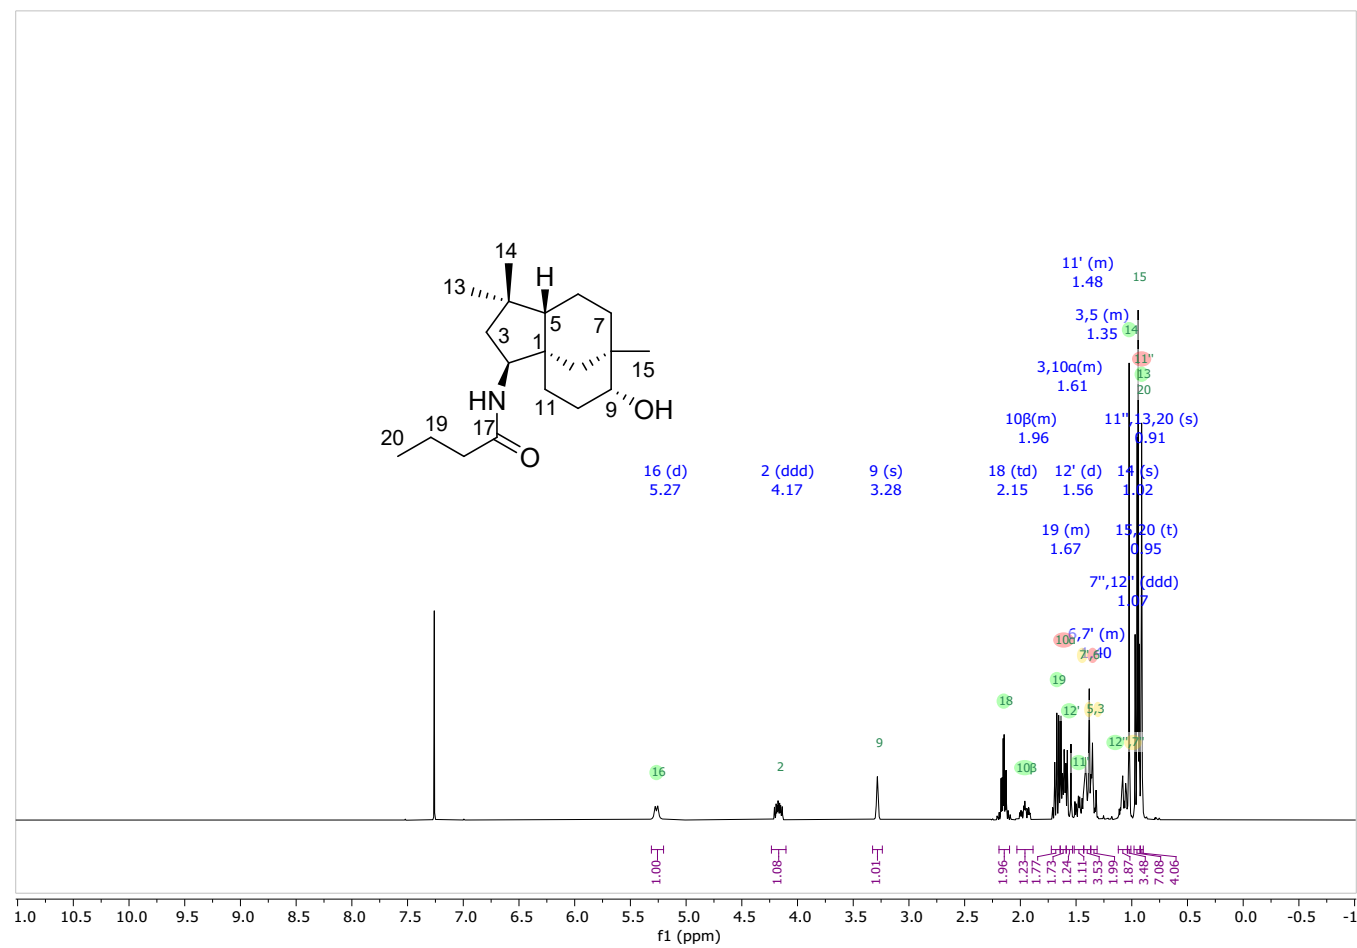

**Figure S3a.** <sup>1</sup>H-NMR spectrum (400 MHz) of *N*-(9 $\alpha$ -hydroyclovan-2 $\beta$ -yl)butyroamide (10) in CDCl<sub>3</sub>.

## Supporting Information

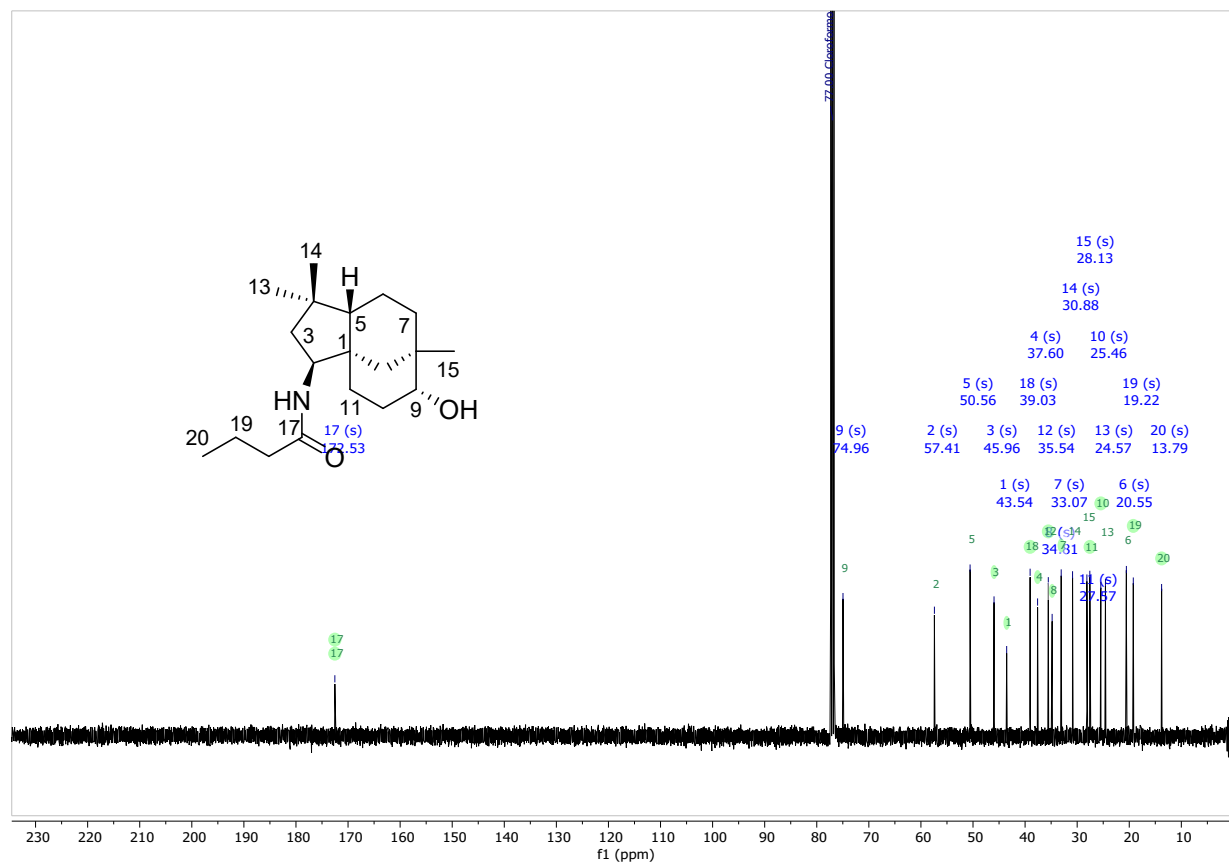

**Figure S3b.** <sup>13</sup>C-NMR spectrum (100 MHz) of N-(9α-hydroxycyclovan-2β-yl)butyramide (10) in CDCl<sub>3</sub>.

## Supporting Information

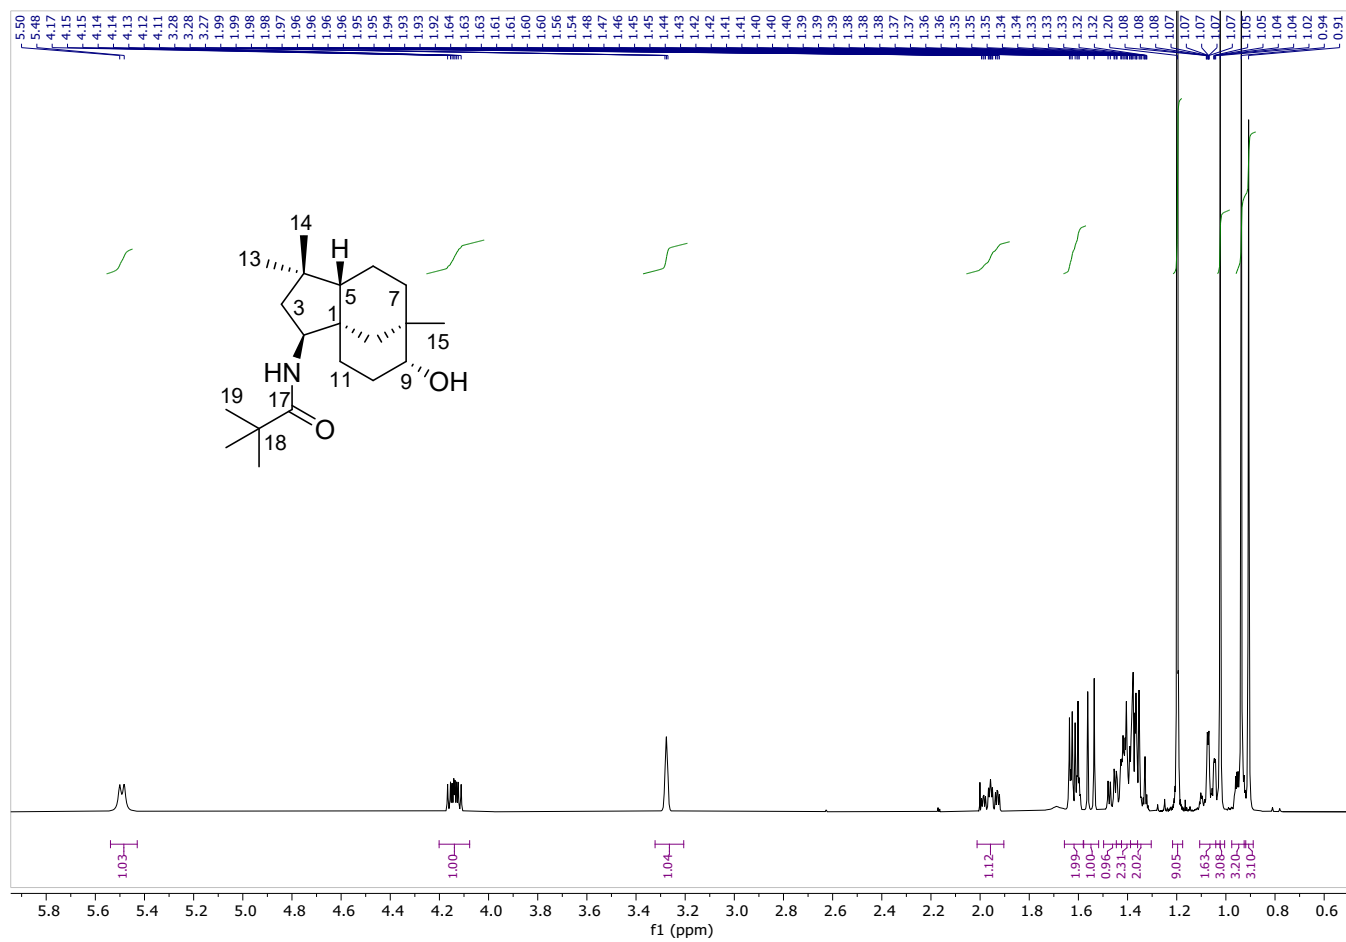

Figure S4a. <sup>1</sup>H NMR spectrum (500 MHz) of 2,2-dimethyl-N-(9α-hydroxycyclovan-2β-yl)propionamide (11) in CDCl<sub>3</sub>.

## Supporting Information

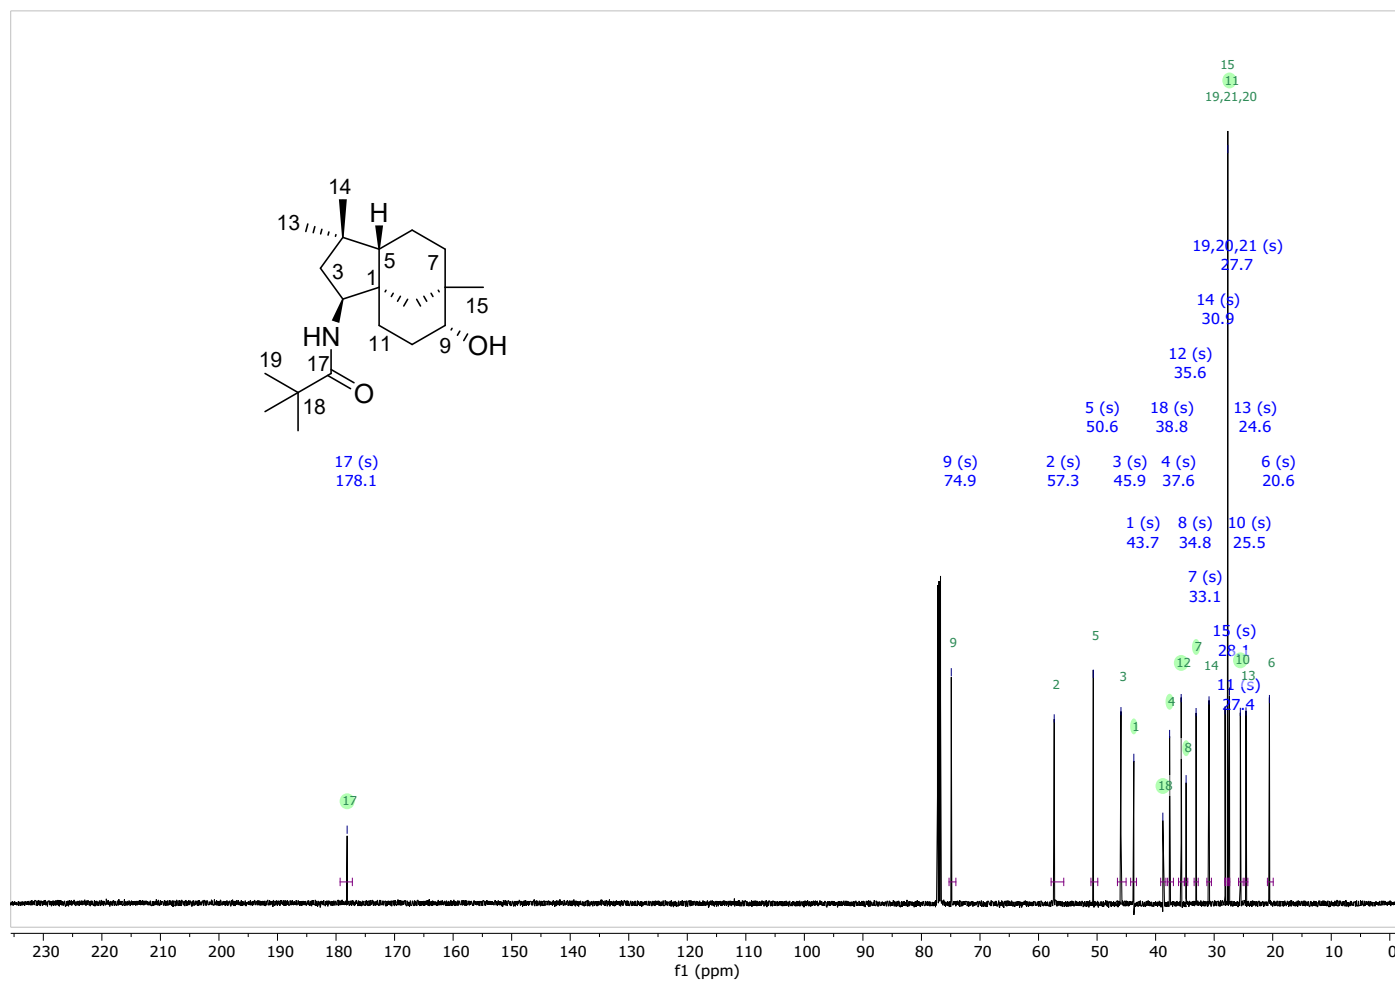

Figure S4b.  $^{13}\text{C}$  NMR spectrum (125MHz) of 2,2-dimethyl-N-(9 $\alpha$ -hydroxycyclovan-2 $\beta$ -yl)propionamide (11) in  $\text{CDCl}_3$ .

## Supporting Information

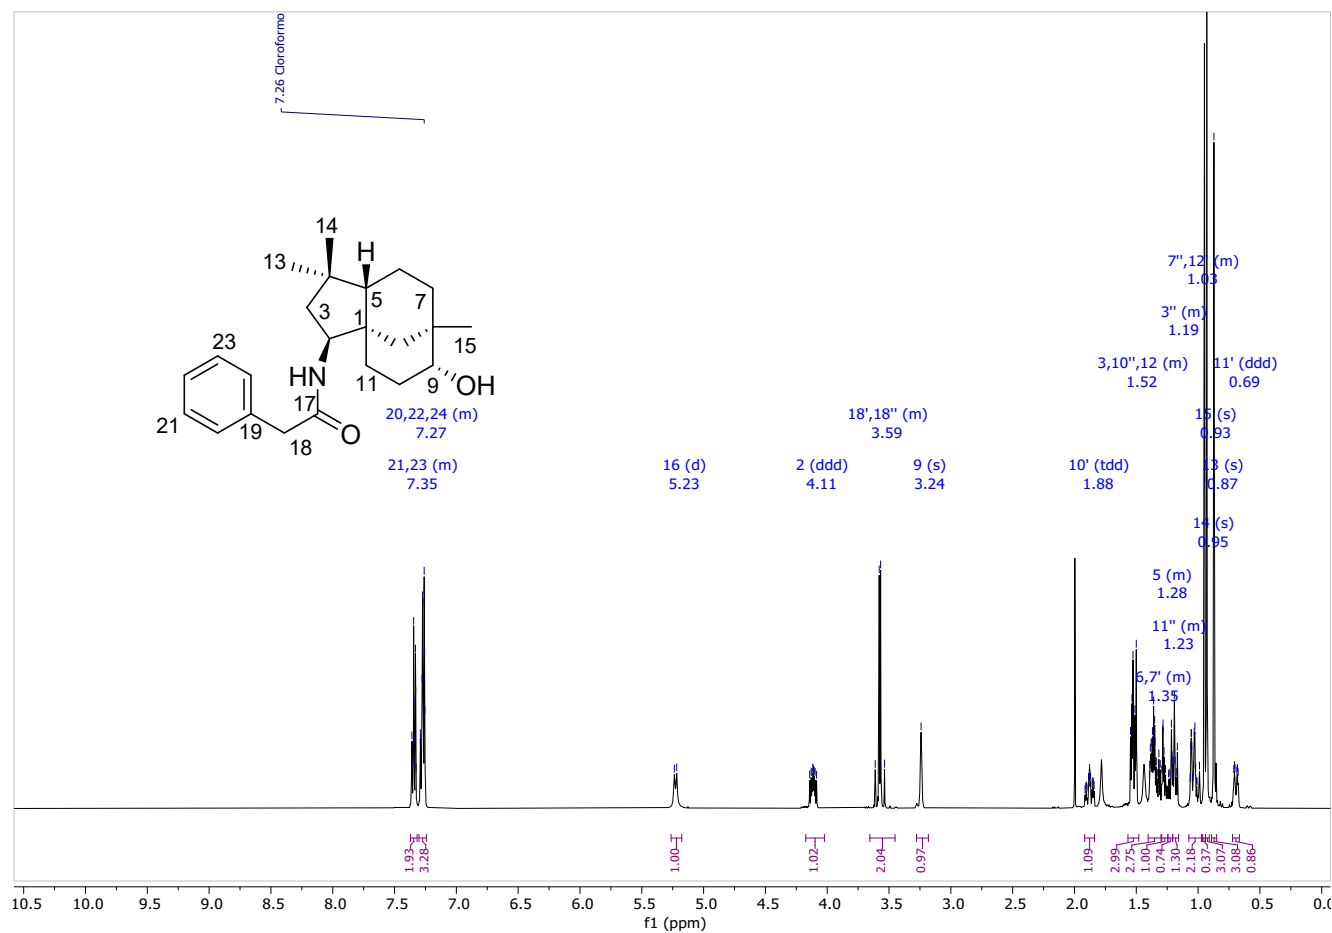

Figure S5a.  $^1\text{H}$  NMR spectrum (500 MHz) of 2-phenyl-N-(9 $\alpha$ -hydroxycyclovan-2 $\beta$ -yl)acetamide (12) in  $\text{CDCl}_3$ .

## Supporting Information

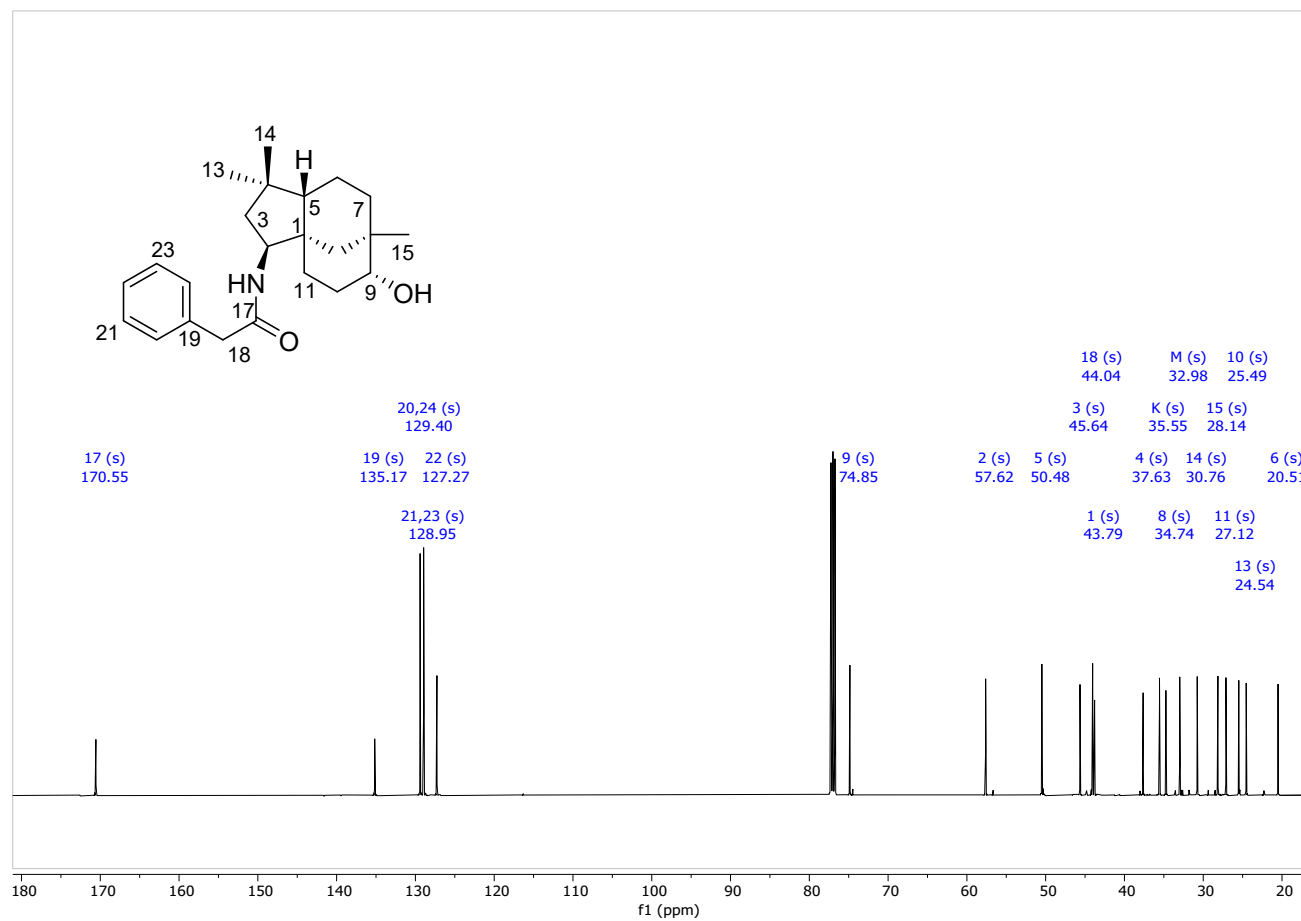

Figure S5b.  $^{13}\text{C}$  NMR spectrum (125 MHz) of 2-phenyl-N-(9 $\alpha$ -hydroxycyclovan-2 $\beta$ -yl)acetamide (12) in  $\text{CDCl}_3$ .

## Supporting Information

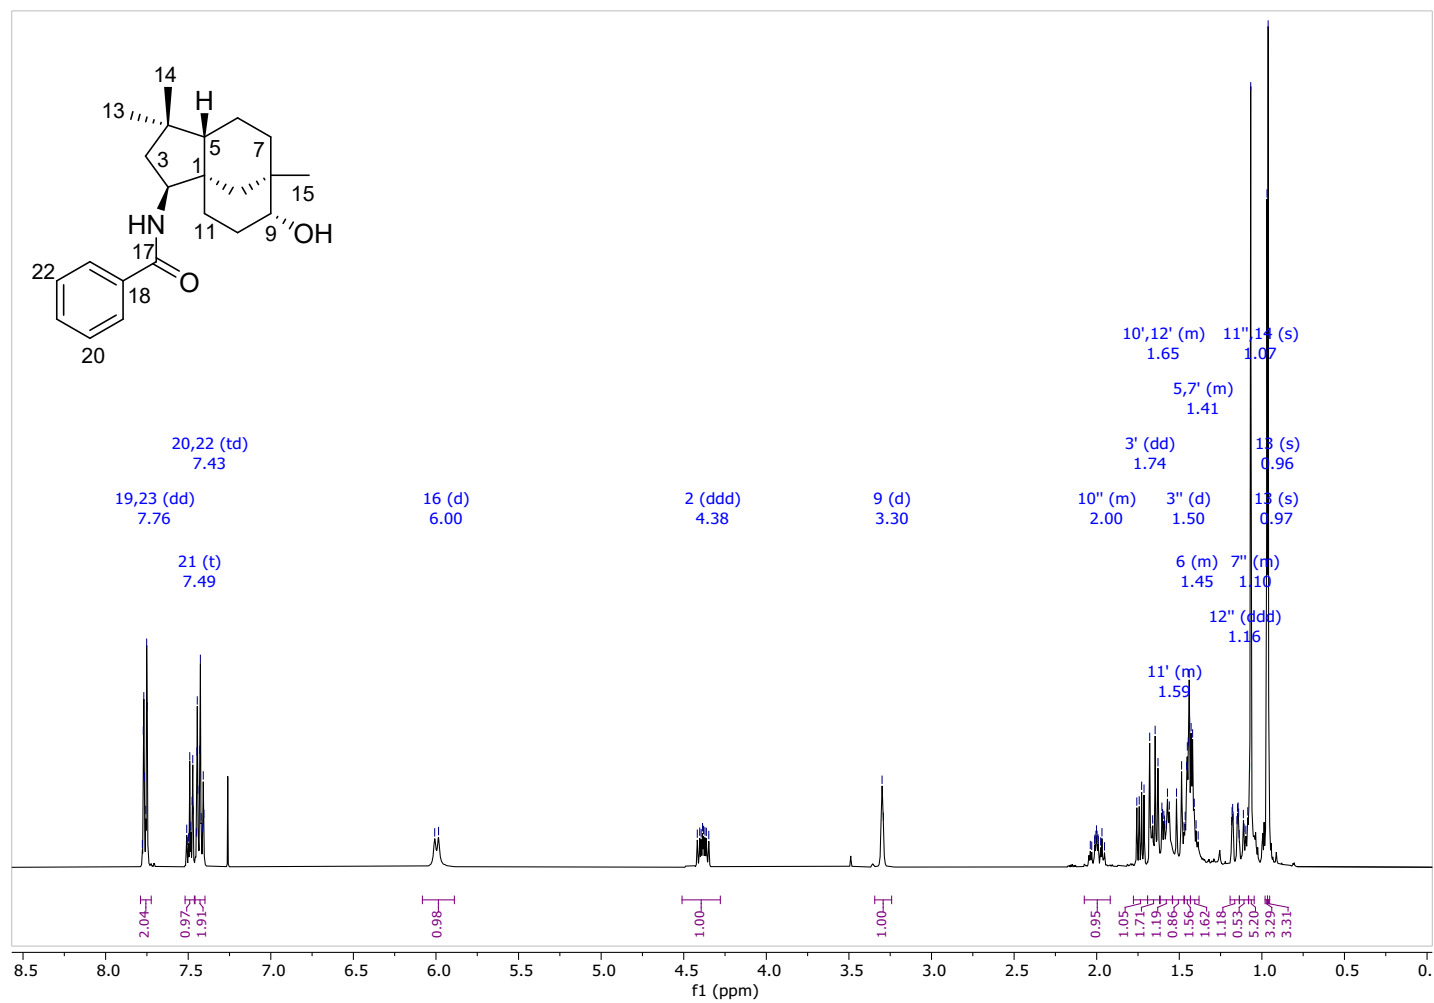

**Figure S6a.** <sup>1</sup>H NMR spectrum (400 MHz) of *N*-(9 $\alpha$ -hydroxyclovan-2 $\beta$ -yl)benzamide (13) in CDCl<sub>3</sub>.

## Supporting Information

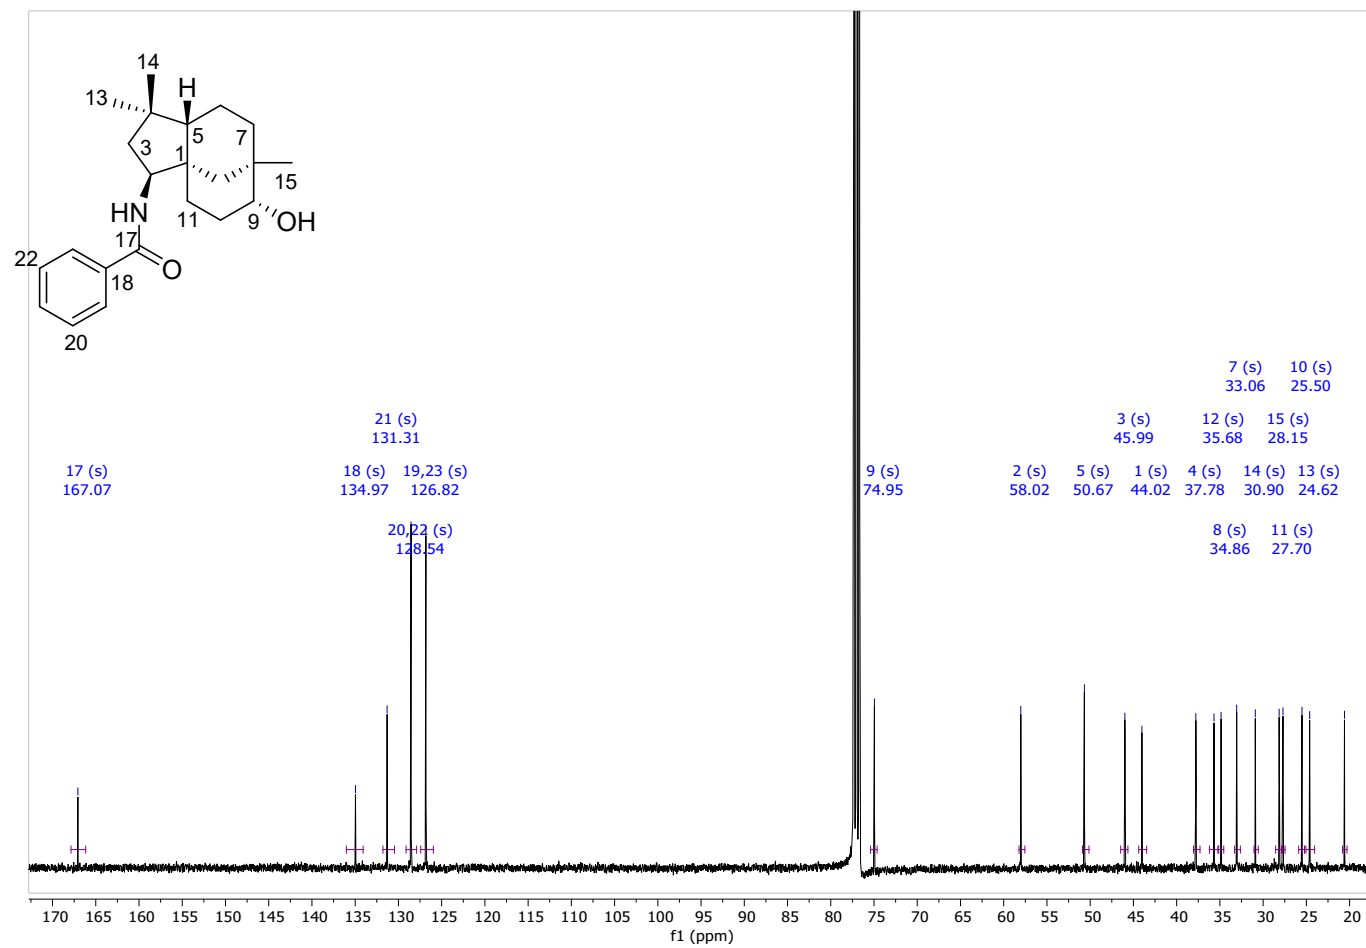

Figure S6b.  $^{13}\text{C}$  NMR spectrum (100 MHz) of *N*-(9 $\alpha$ -hydroxycyclovan-2 $\beta$ -yl)benzamide (13) in  $\text{CDCl}_3$ .

## Supporting Information

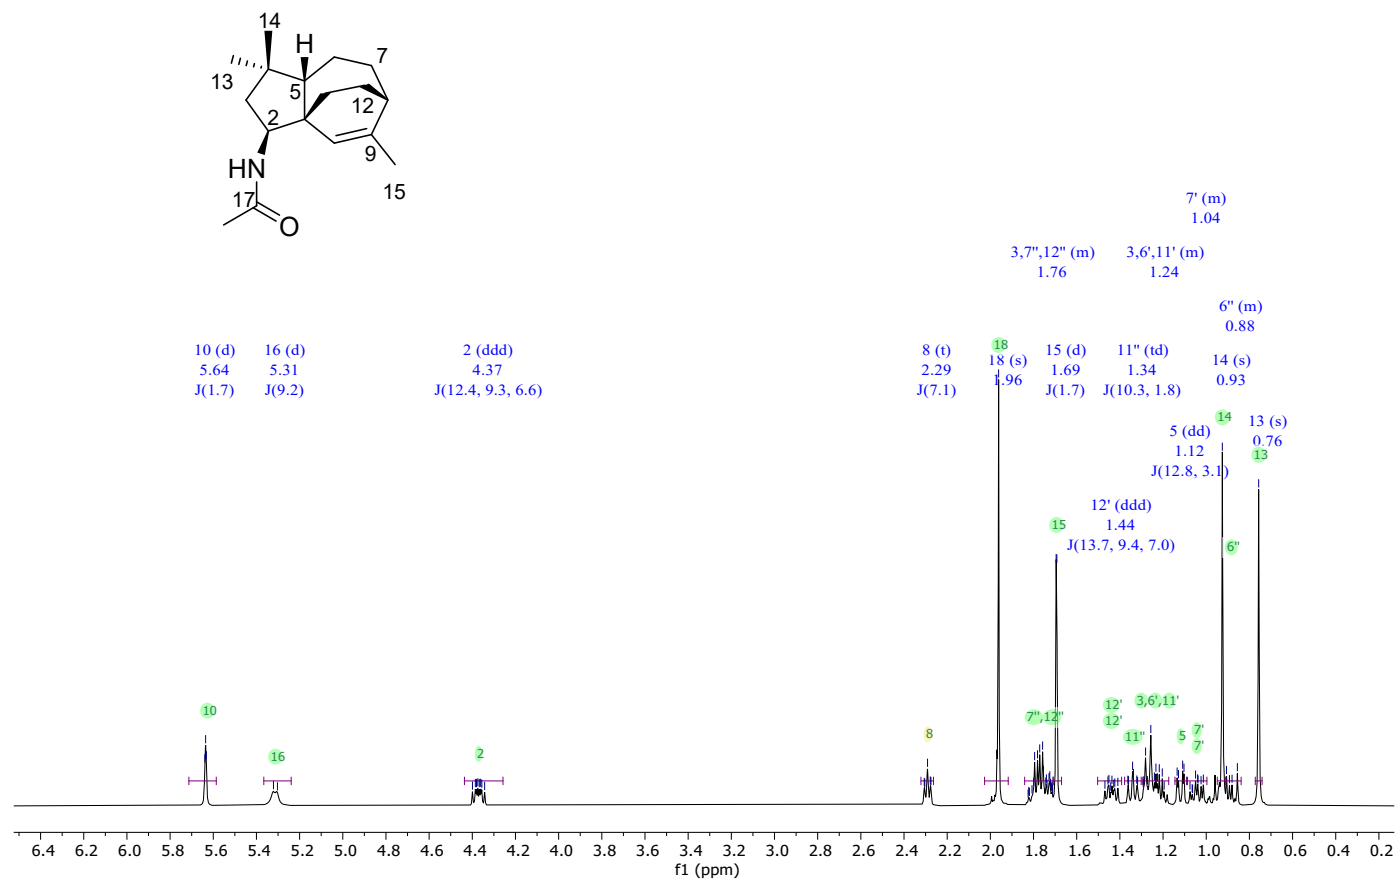

Figure S7a. <sup>1</sup>H NMR spectrum (500 MHz) of *N*-((1*S*,2*S*,5*S*,8*S*)-4,4,9-trimethyltricyclo(6.2.2.0<sup>1,5</sup>)dodec-9-en-2-yl)acetamide (14) in CDCl<sub>3</sub>.

## Supporting Information

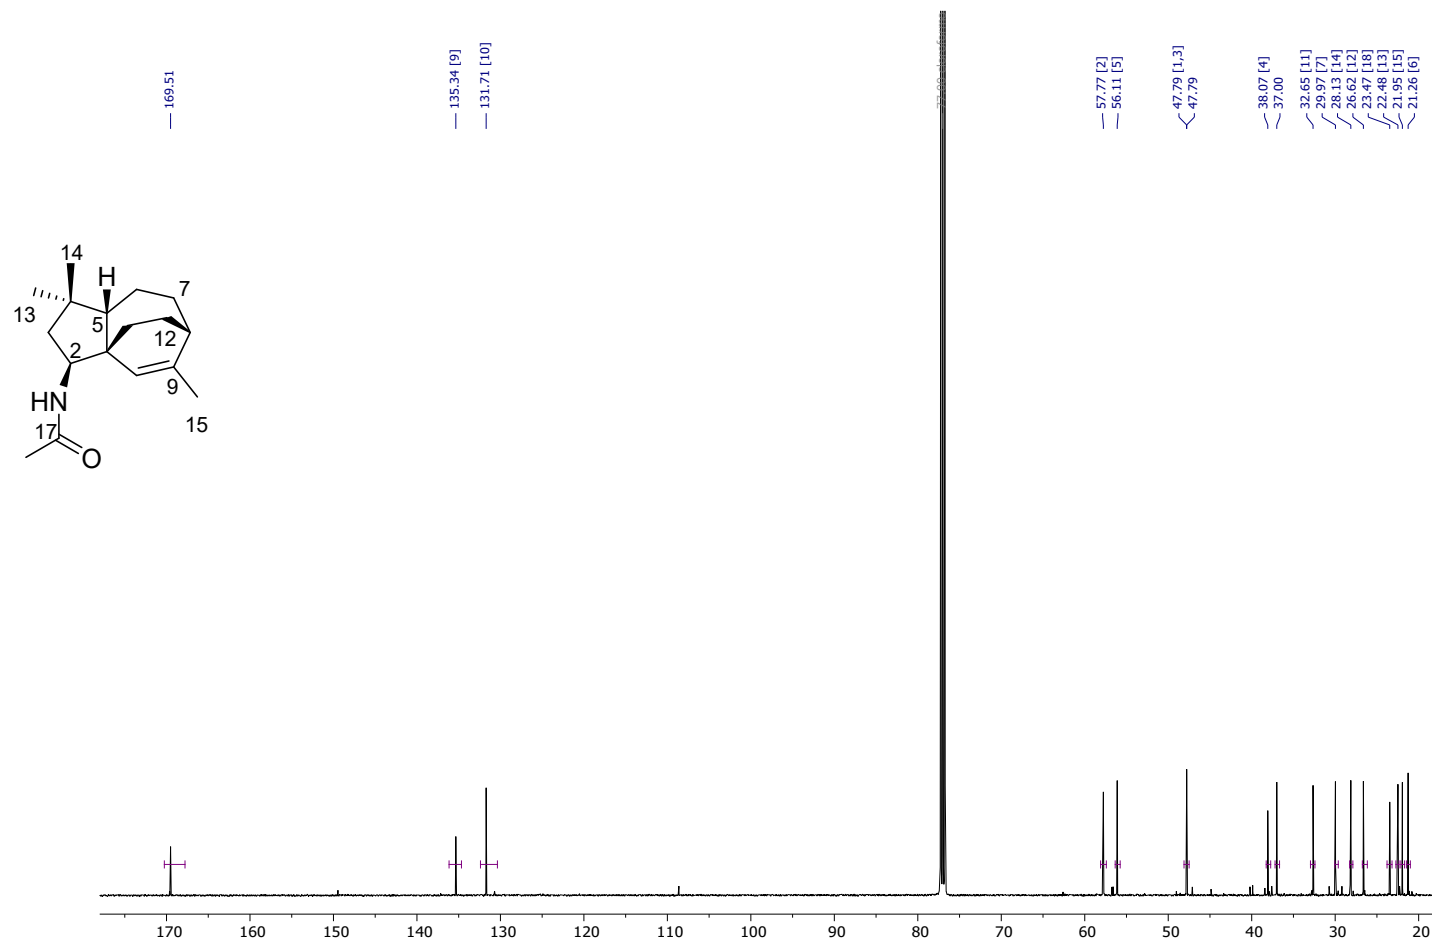

Figure S7b. <sup>13</sup>C NMR spectrum (125 MHz) of *N*-((1*S*,2*S*,5*S*,8*S*)-4,4,9-trimethyltricyclo(6.2.2.0<sup>1,5</sup>)dodec-9-en-2-yl)acetamide (14) in CDCl<sub>3</sub>.



## Supporting Information

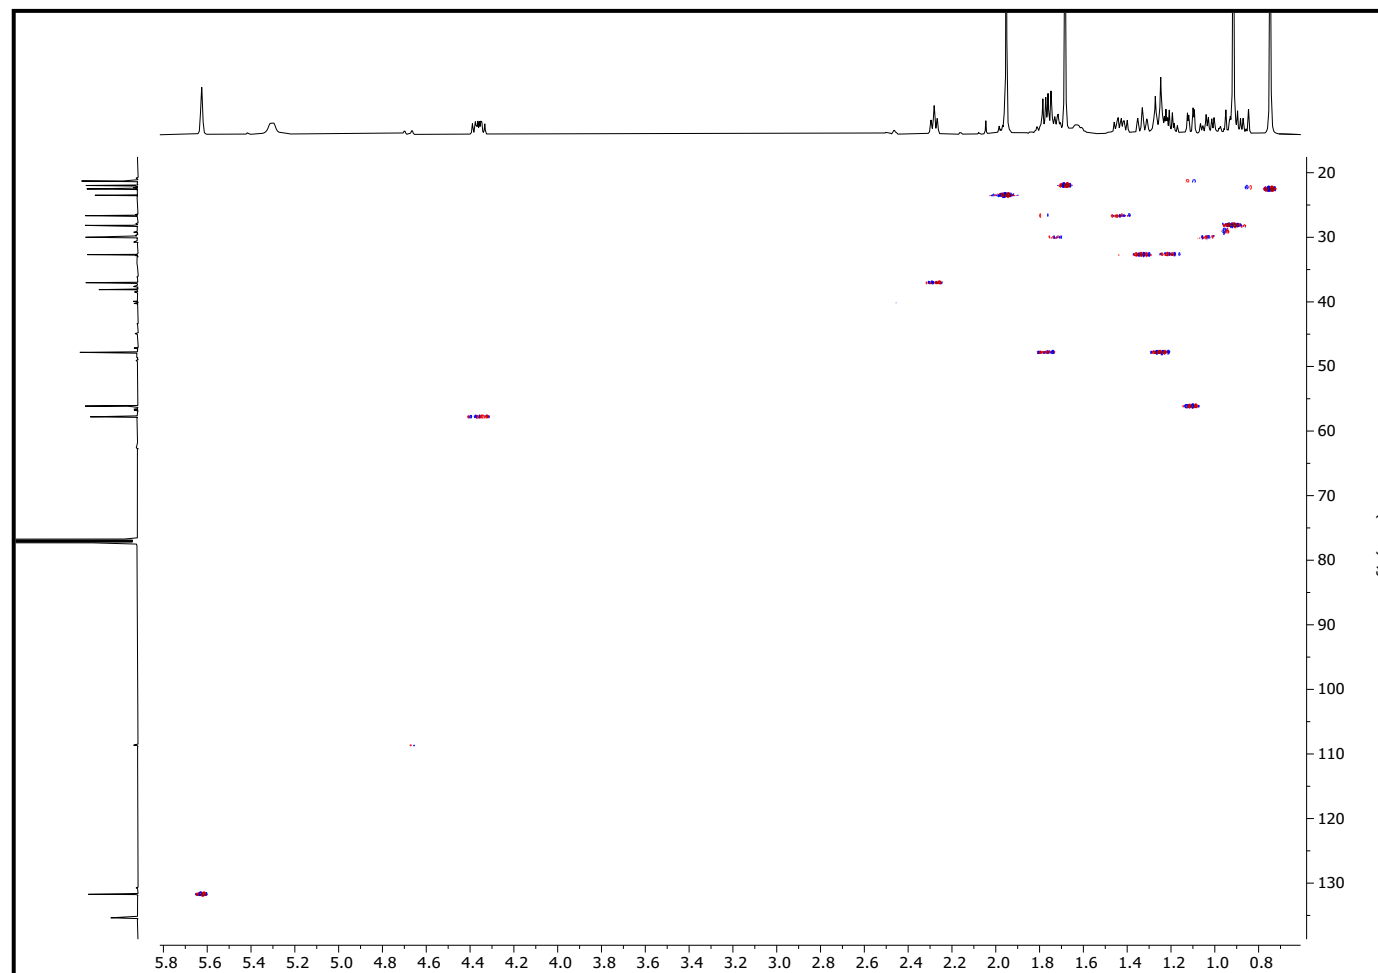

Figure S7d. HSQC spectrum of *N*-((1*S*,2*S*,5*S*,8*S*)-4,4,9-trimethyltricyclo(6.2.2.0<sup>1,5</sup>)dodec-9-en-2-yl)acetamide (**14**) CDCl<sub>3</sub>.

## Supporting Information

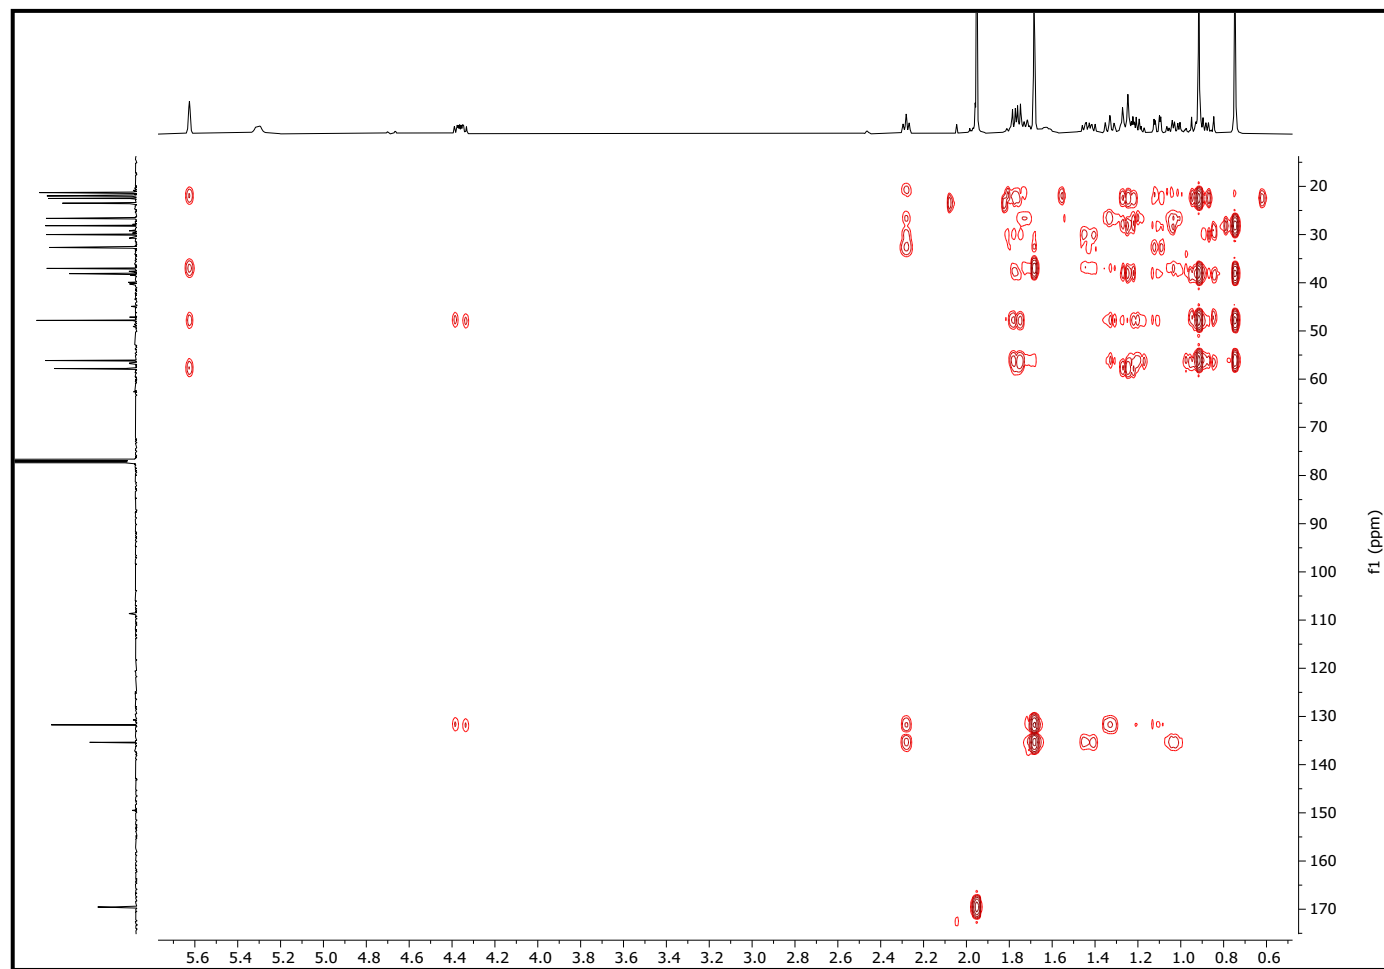

Figure S7e. HMBC spectrum of *N*-((1*S*,2*S*,5*S*,8*S*)-4,4,9-trimethyltricyclo(6.2.2.0<sup>1,5</sup>)dodec-9-en-2-yl)acetamide (**14**) in  $\text{CDCl}_3$ .

## Supporting Information

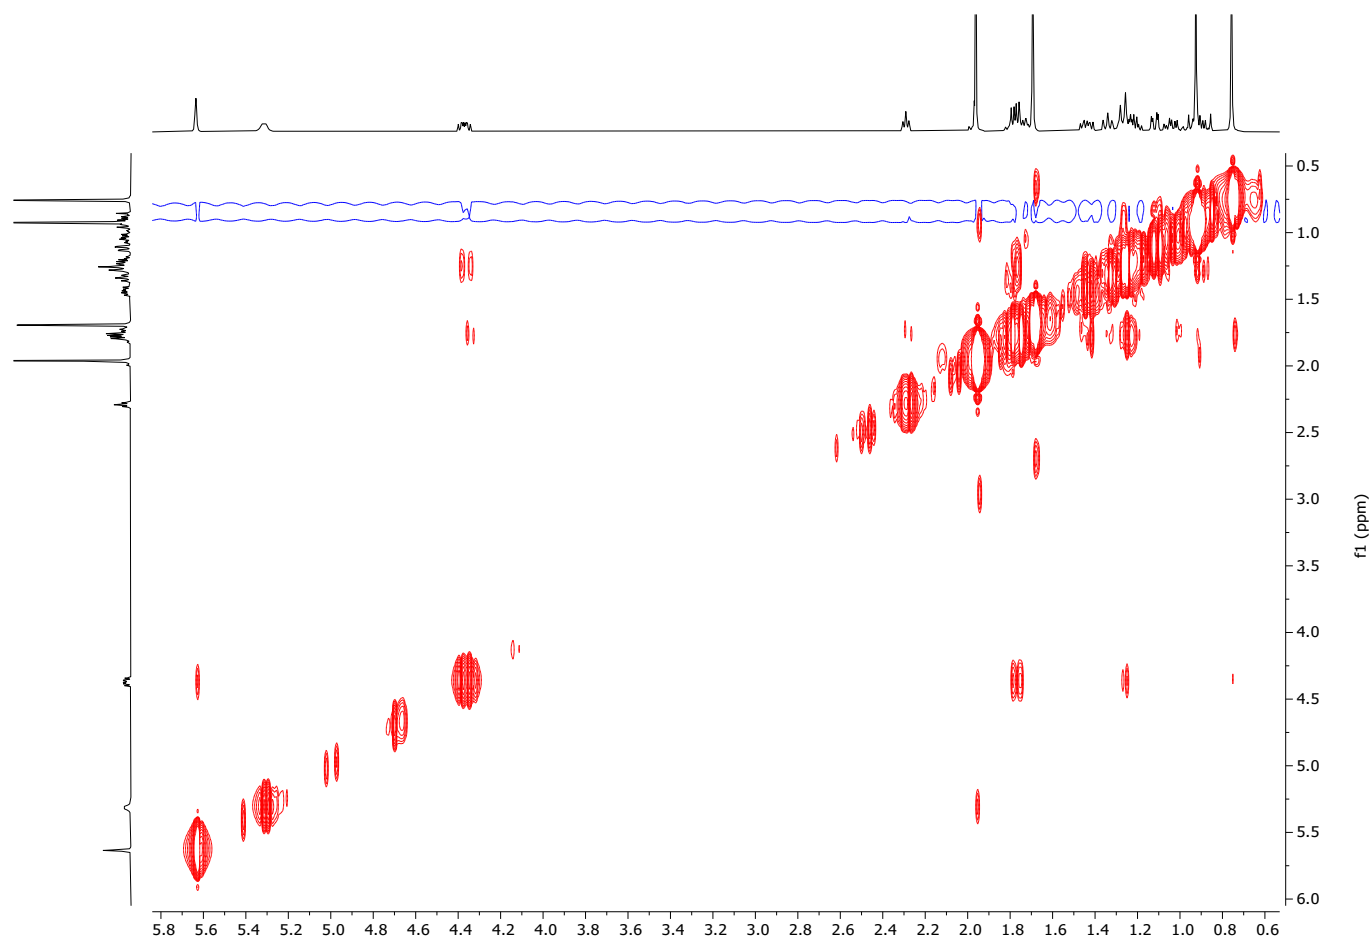

Figure S7f. NOESY2D spectrum of *N*-((1*S*,2*S*,5*S*,8*S*)-4,4,9-trimethyltricyclo(6.2.2.0<sup>1,5</sup>)dodec-9-en-2-yl)acetamide (**14**) in CDCl<sub>3</sub>.

## Supporting Information

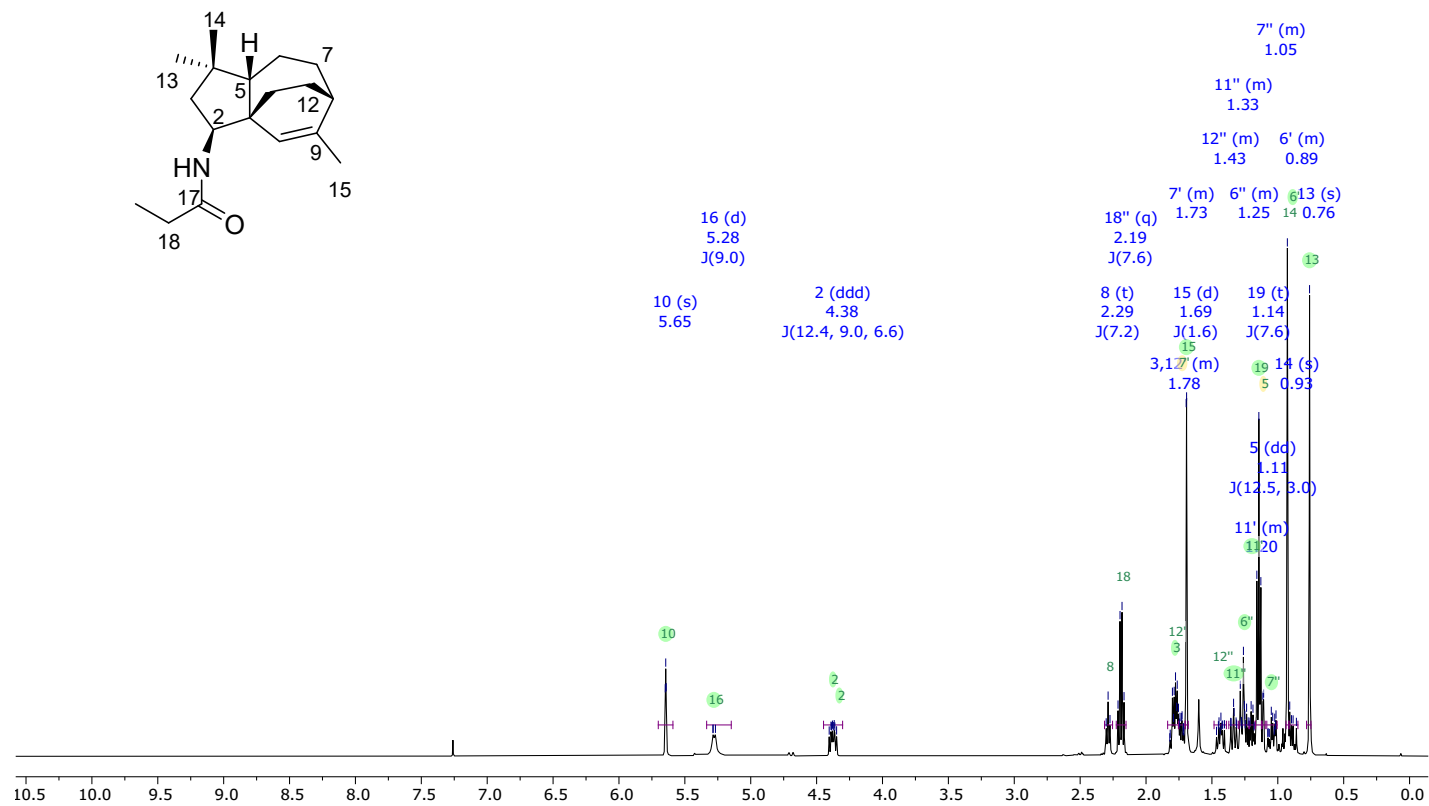

Figure S8a. <sup>1</sup>H-NMR spectrum (400 MHz) of *N*-((1*S*,2*S*,5*S*,8*S*)-4,4,9-trimethyltricyclo(6.2.2.0<sup>1,5</sup>)dodec-9-en-2-yl)propionamide (15) in CDCl<sub>3</sub>.

## Supporting Information

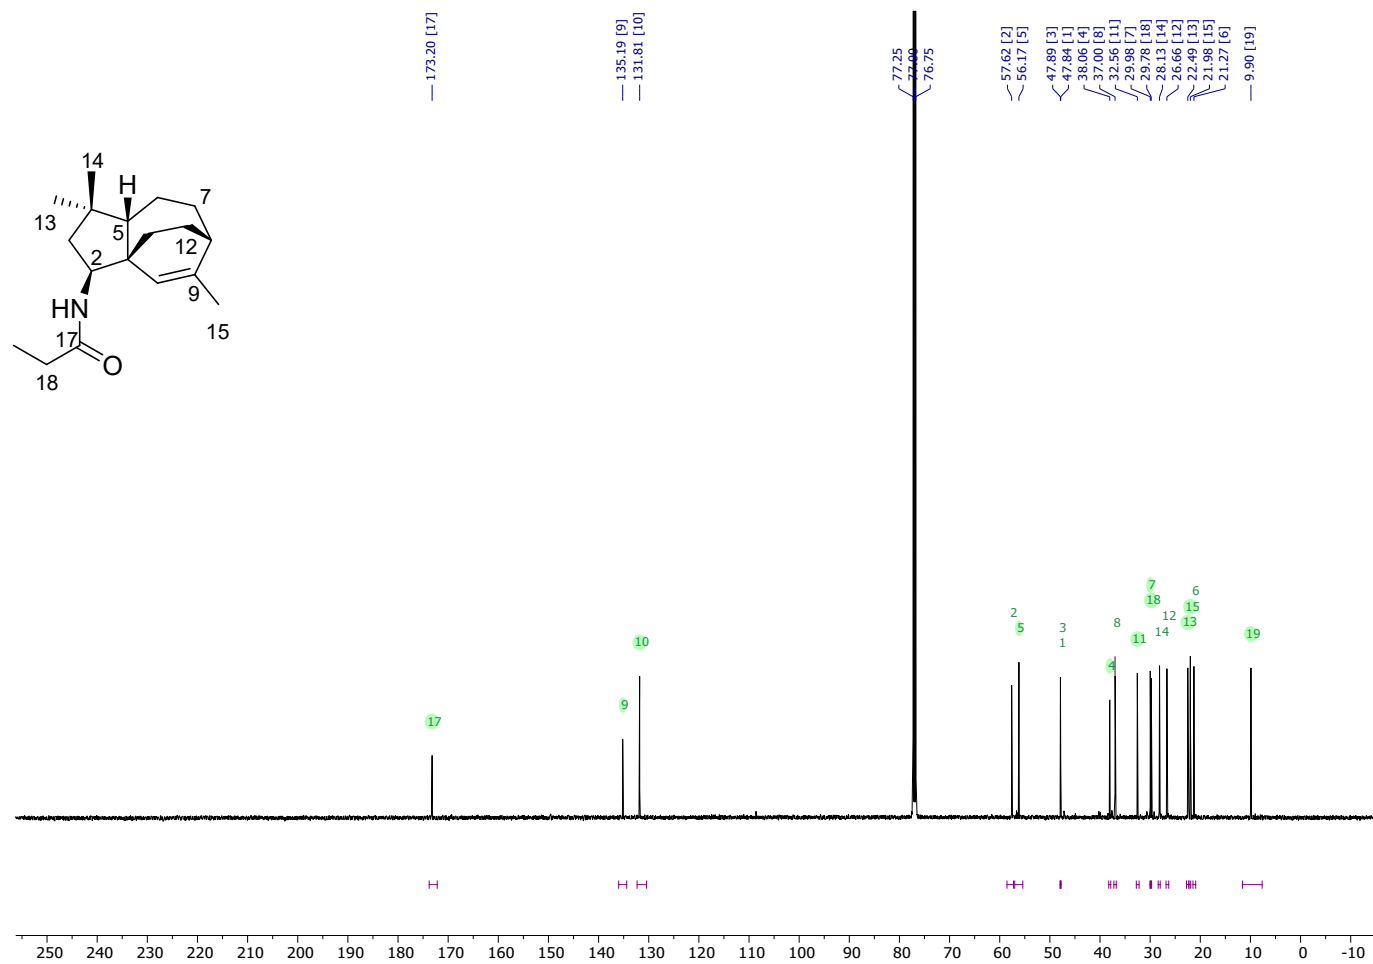

**Figure S8b.** <sup>13</sup>C-NMR spectrum (100 MHz) of *N*-((1*S*,2*S*,5*S*,8*S*)-4,4,9-trimethyltricyclo(6.2.2.0<sup>1,5</sup>)dodec-9-en-2-yl)propionamida (15) in CDCl<sub>3</sub>.

## Supporting Information

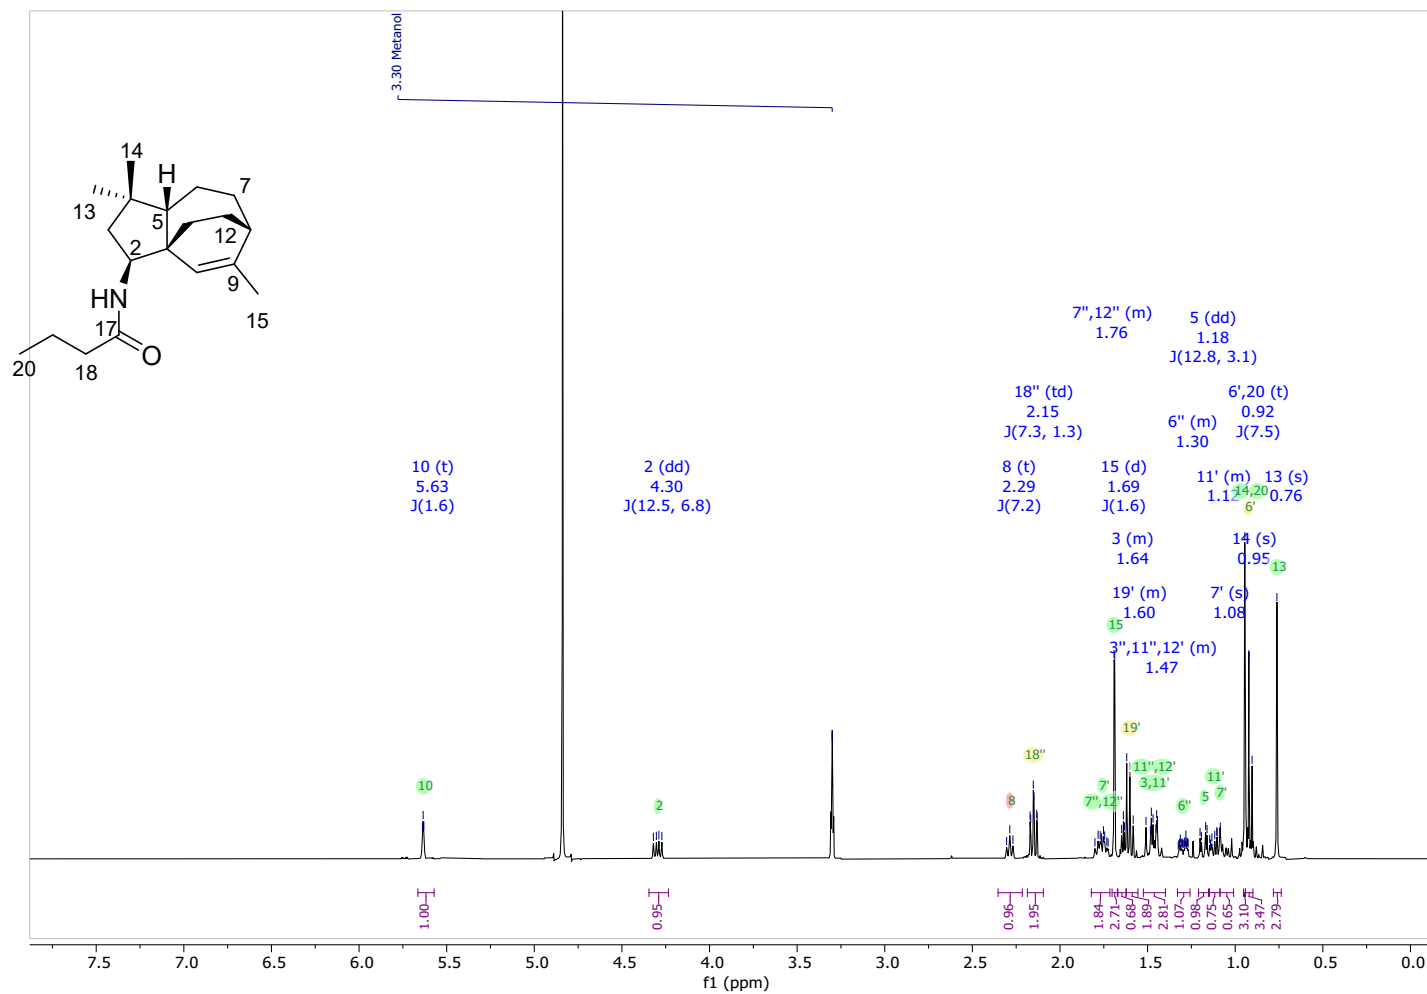

Figure S9a. <sup>1</sup>H-NMR spectrum (500 MHz) of *N*-((1*S*,2*S*,5*S*,8*S*)-4,4,9-trimethyltricyclo(6.2.2.0<sup>1,5</sup>)dodec-9-en-2-yl)butyroamide (16) in CD<sub>3</sub>OD.

## Supporting Information

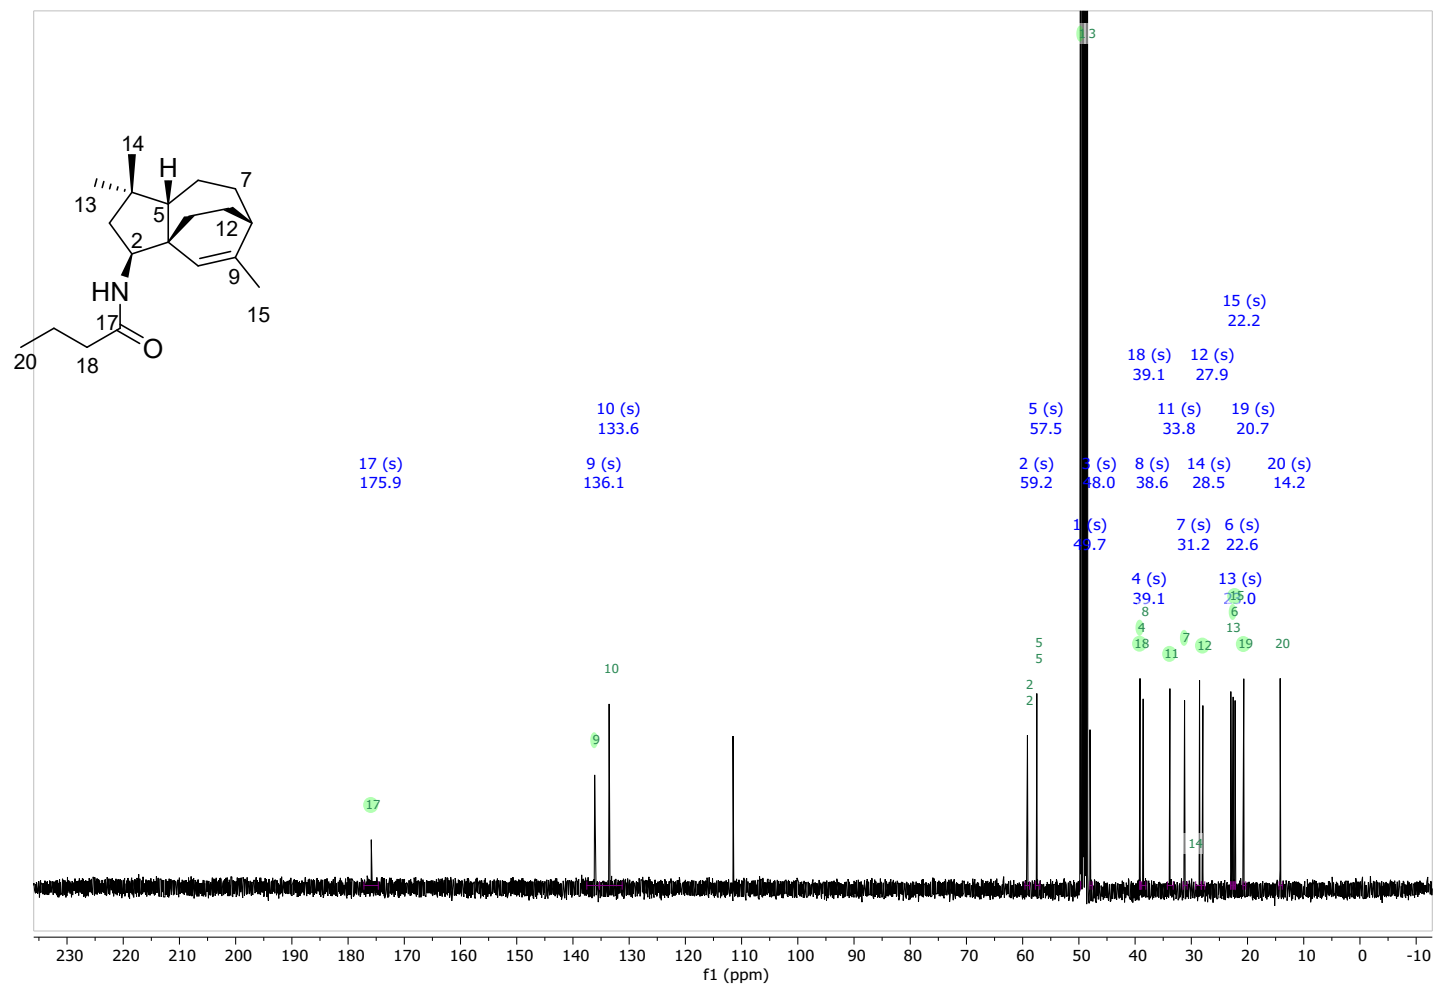

**Figure S9b.** <sup>13</sup>C-NMR spectrum (125 MHz) of N-((1S,2S,5S,8S)-4,4,9-trimethyltricyclo(6.2.2.0<sup>1,5</sup>)dodec-9-en-2-yl)butiromide (16) in CD<sub>3</sub>OD.

## Supporting Information

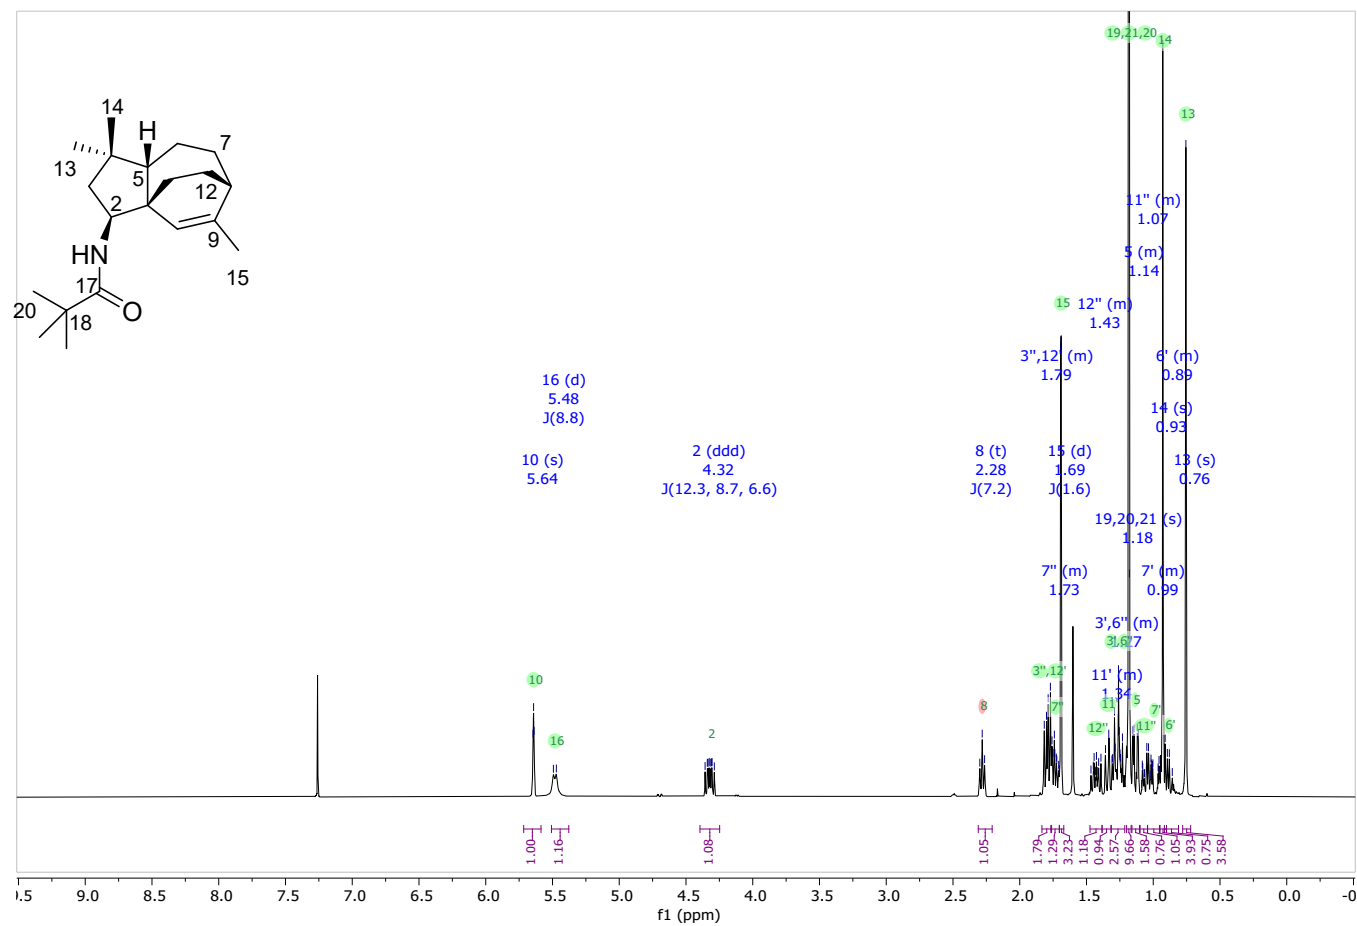

**Figure S10a.** <sup>1</sup>H-NMR spectrum (400 MHz) of 2,2-dimethyl-N-((1S,2S,5S,8S)-4,4,9-trimethyltricyclo(6.2.2.0<sup>1,5</sup>)dodec-9-en-2-yl)propionamide (17) in CDCl<sub>3</sub>.

## Supporting Information

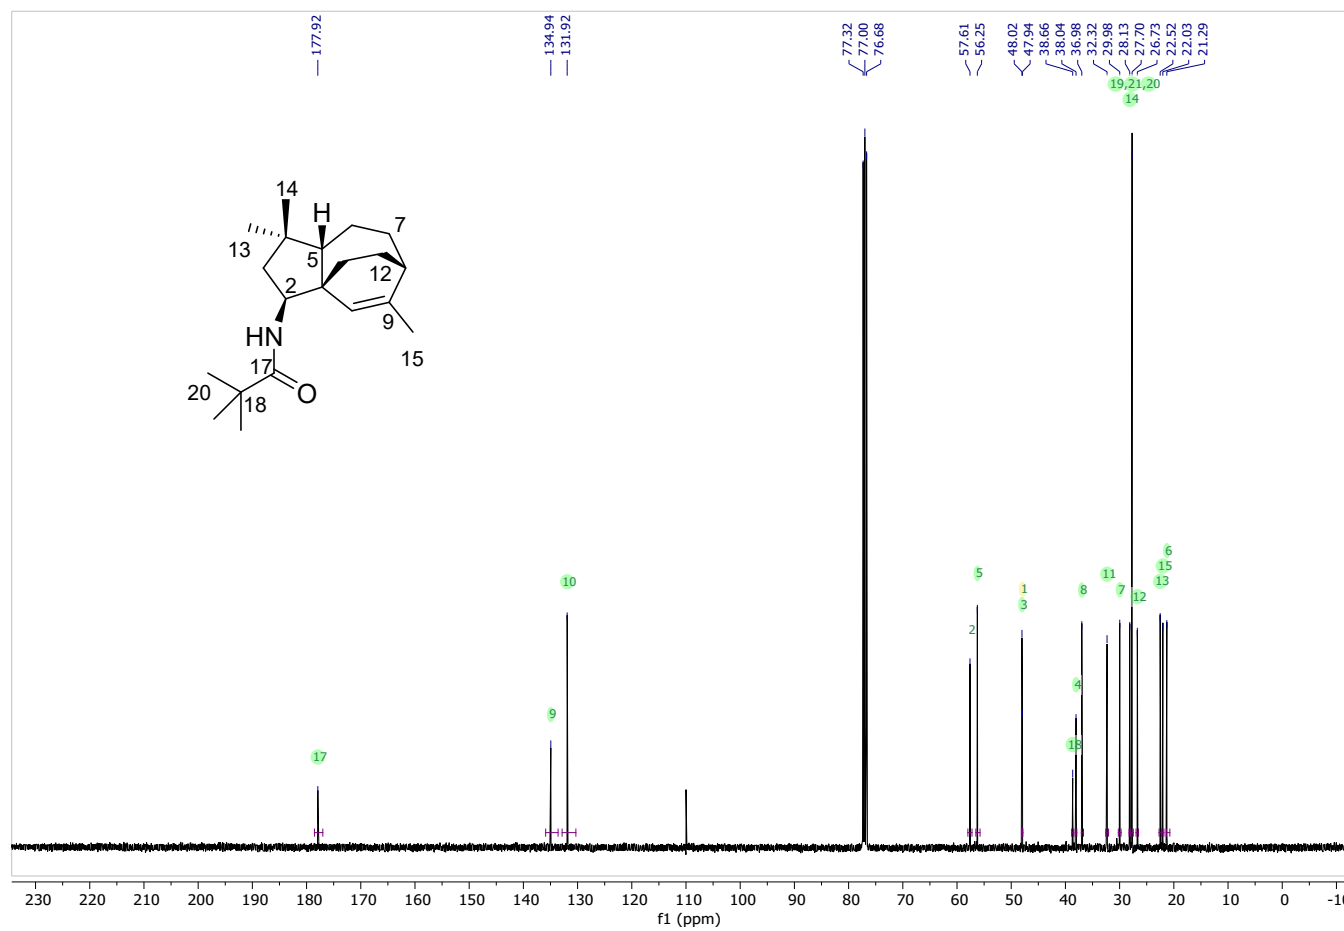

Figure S10b. <sup>13</sup>C-NMR spectrum (100 MHz) of 2,2-dimethyl-N-((1S,2S,5S,8S)-4,4,9-trimethyltricyclo(6.2.2.0<sup>1,5</sup>)dodec-9-en-2-yl)propionamide (17) in CDCl<sub>3</sub>.

## Supporting Information

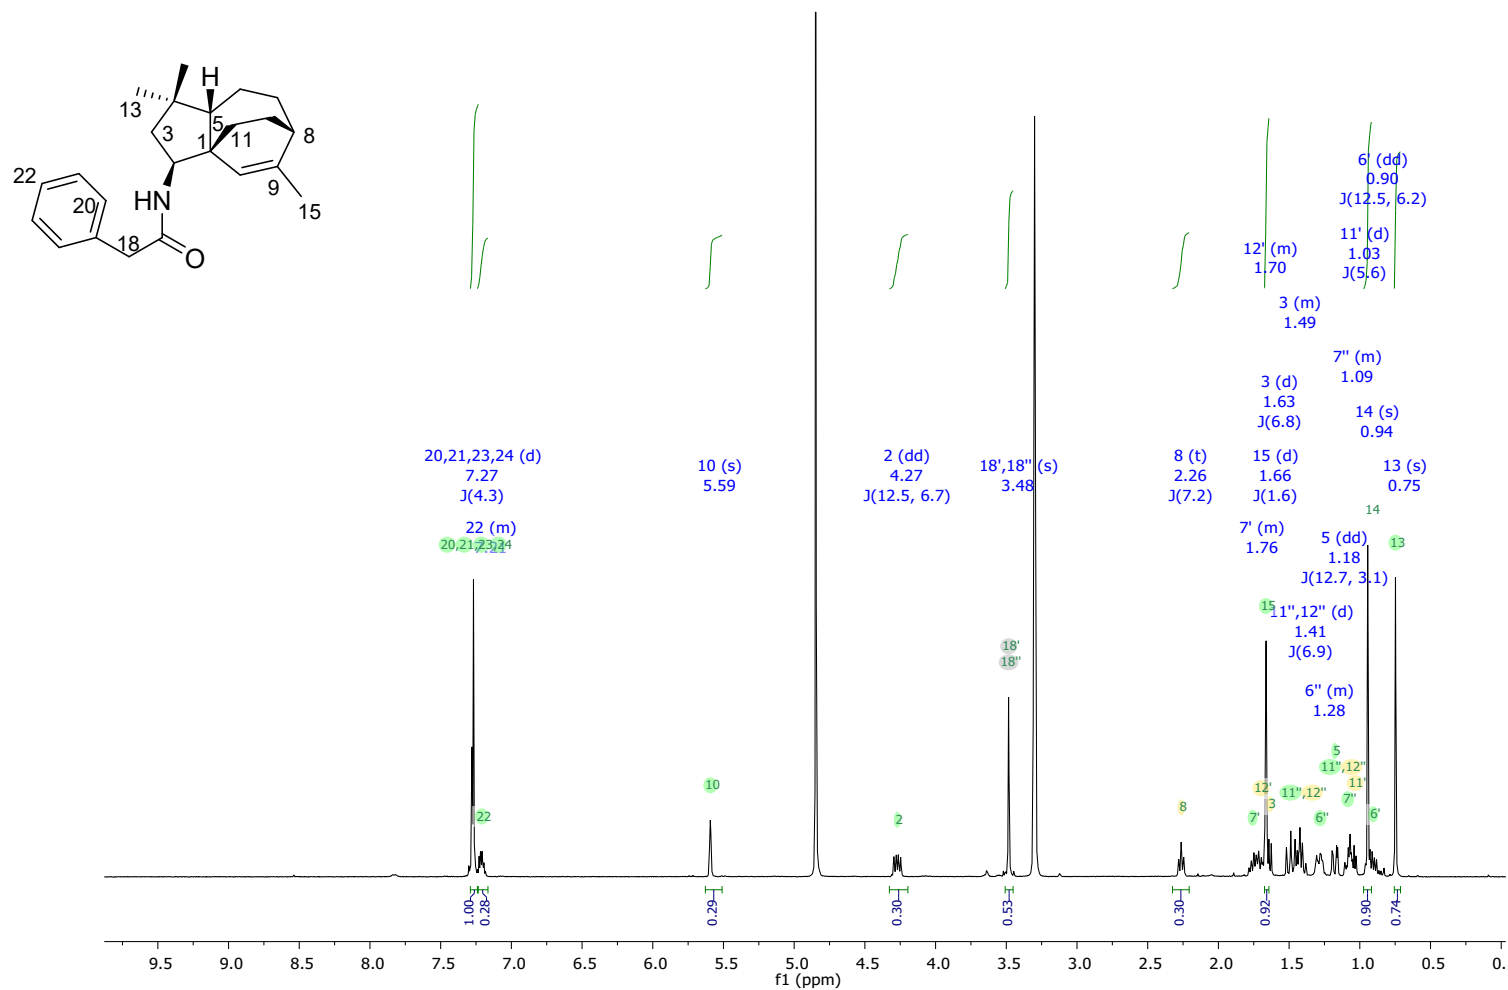

Figure S11a. <sup>1</sup>H-NMR spectrum (400 MHz) of 2-phenyl-N-((1S,2S,5S,8S)-4,4,9-trimethyltricyclo(6.2.2.0<sup>1,5</sup>)dodec-9-en-2-yl)acetamide (18) in CD<sub>3</sub>OD.

## Supporting Information

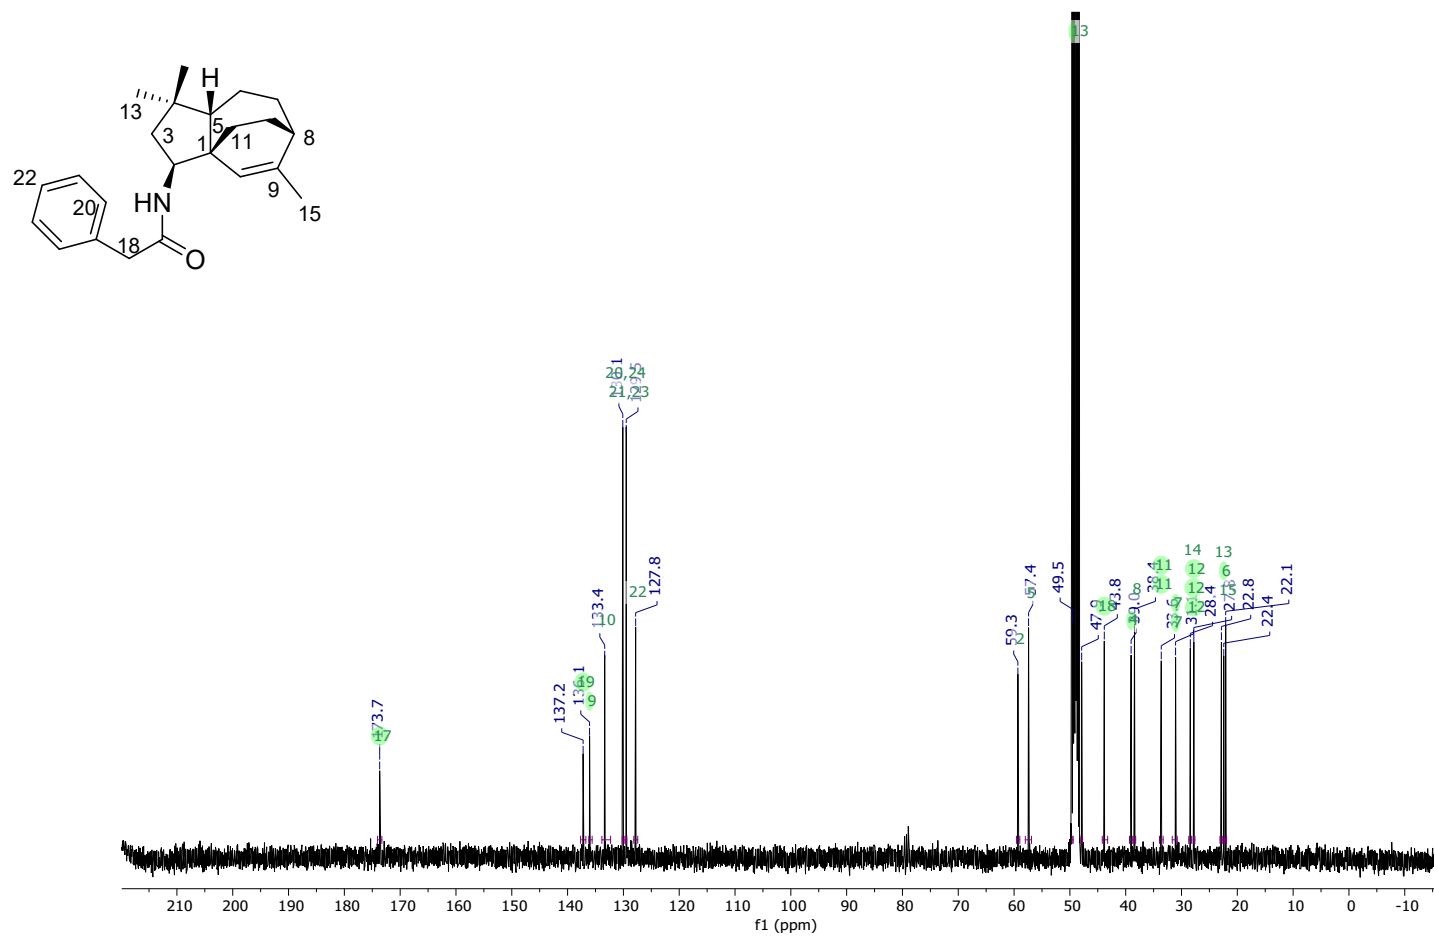

Figure S11b.  $^{13}\text{C}$ -NMR spectrum (100 MHz) of 2-phenyl-N-((1S,2S,5S,8S)-4,4,9-trimethyltricyclo(6.2.2.0<sup>1,5</sup>)dodec-9-en-2-yl)acetamide (18) in  $\text{CD}_3\text{OD}$ .

## Supporting Information

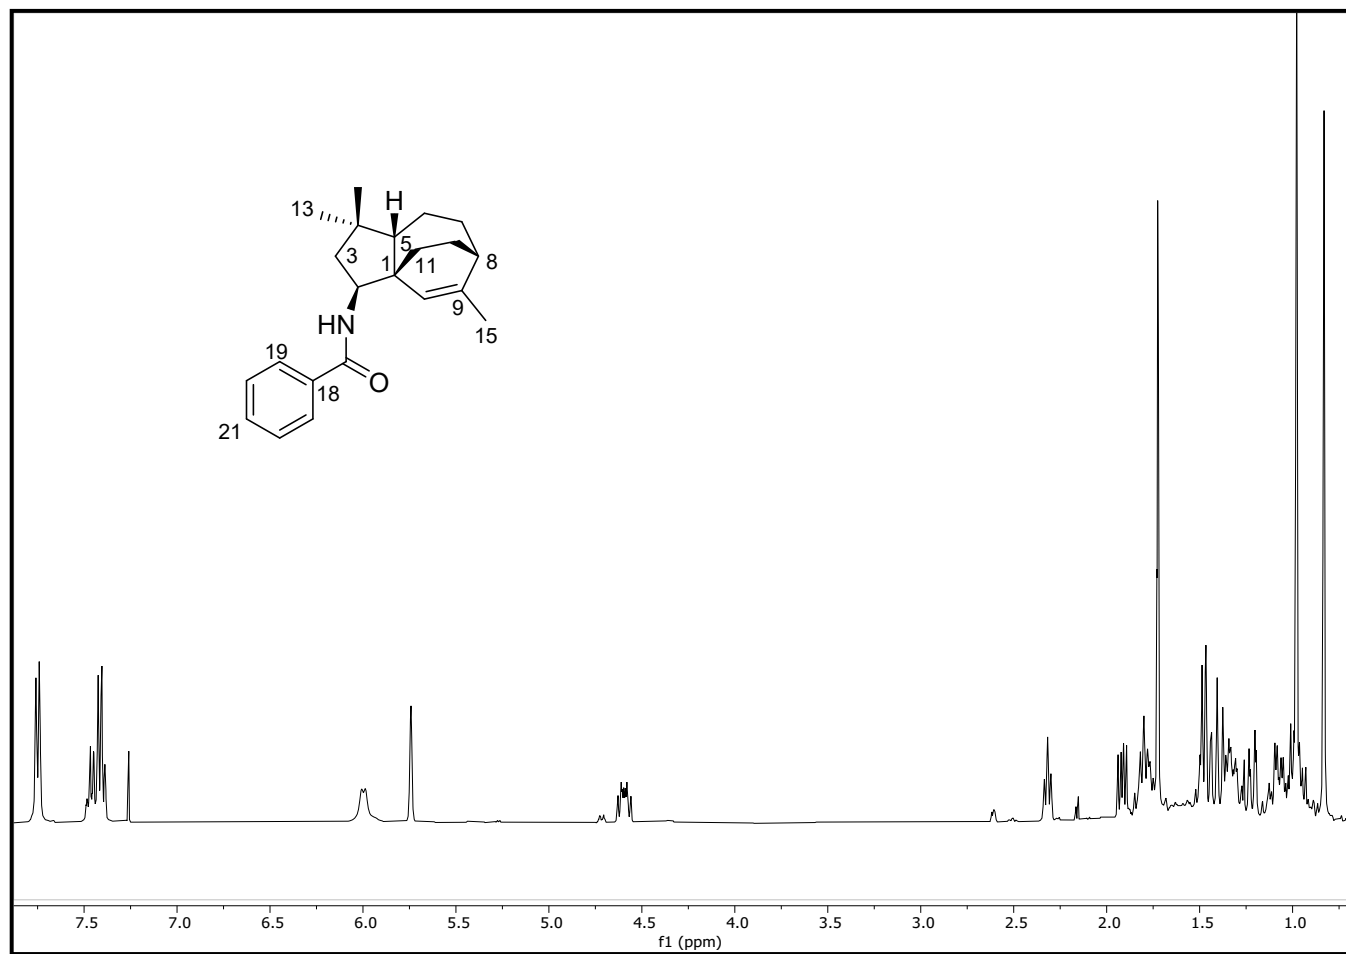

Figure S12a. <sup>1</sup>H-NMR spectrum (500 MHz) of N-((1S,2S,5S,8S)-4,4,9-trimethyltricyclo(6.2.2.0<sup>1,5</sup>)dodec-9-en-2-yl)benzamide (19) in CDCl<sub>3</sub>.

## Supporting Information

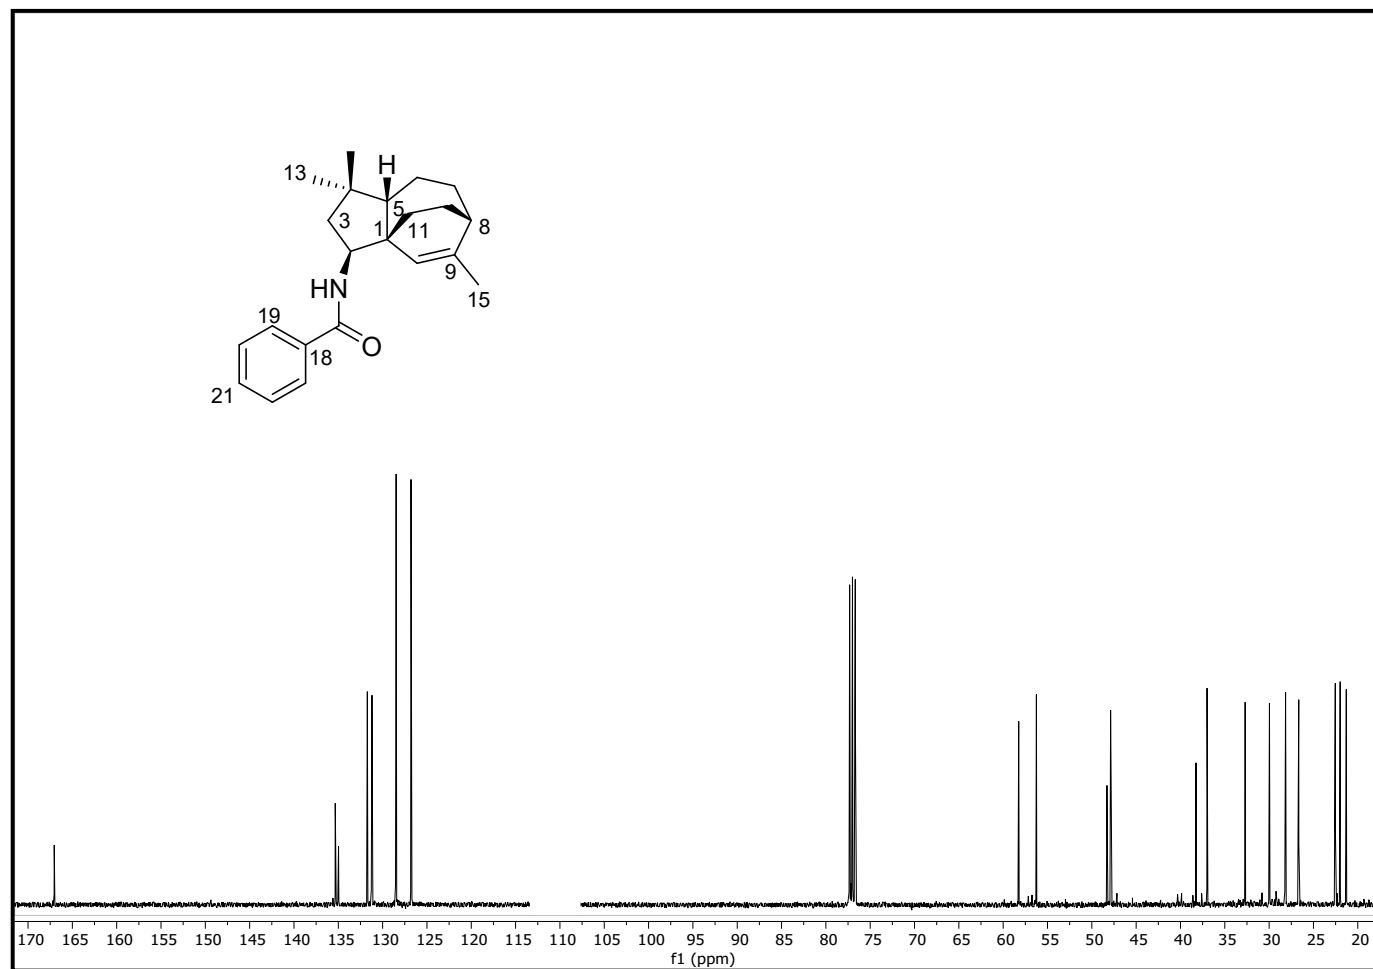

Figure S12b. <sup>13</sup>C-NMR spectrum (100 MHz) of *N*-((1*S*,2*S*,5*S*,8*S*)-4,4,9-trimethyltricyclo(6.2.2.0<sup>1,5</sup>)dodec-9-en-2-yl)benzamide (19) in CDCl<sub>3</sub>.

## Supporting Information

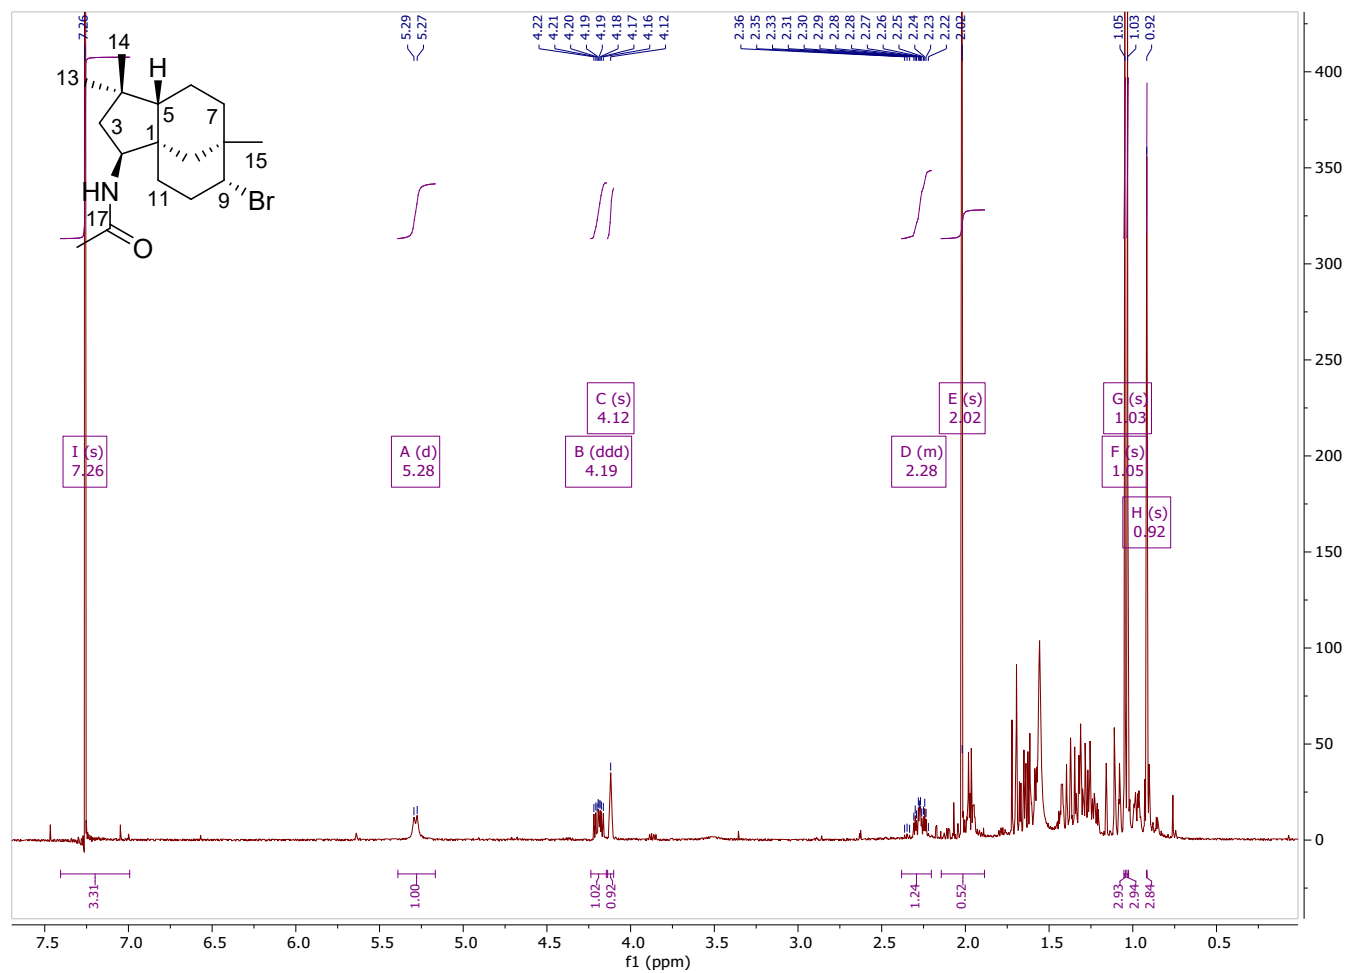

Figure S13a. <sup>1</sup>H NMR spectrum (500 MHz) of N-(9α-bromoclovan-2β-yl)acetamide (20) in CDCl<sub>3</sub>.

## Supporting Information

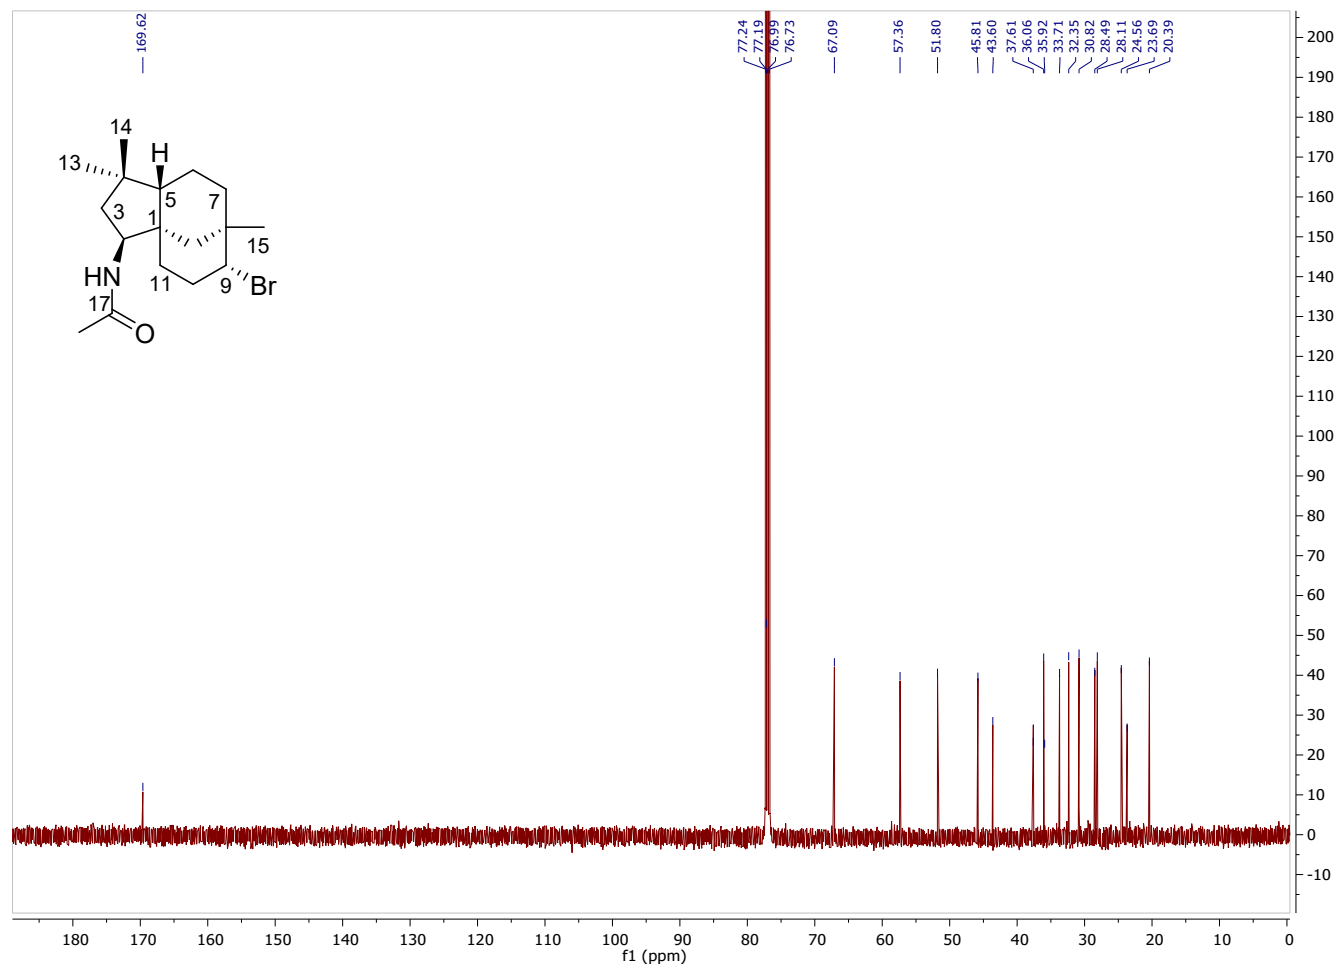

Figure S13b. <sup>13</sup>C NMR spectrum (125 MHz) of N-(9α-bromoclovan-2β-yl)acetamide (20) in CDCl<sub>3</sub>.

## Supporting Information

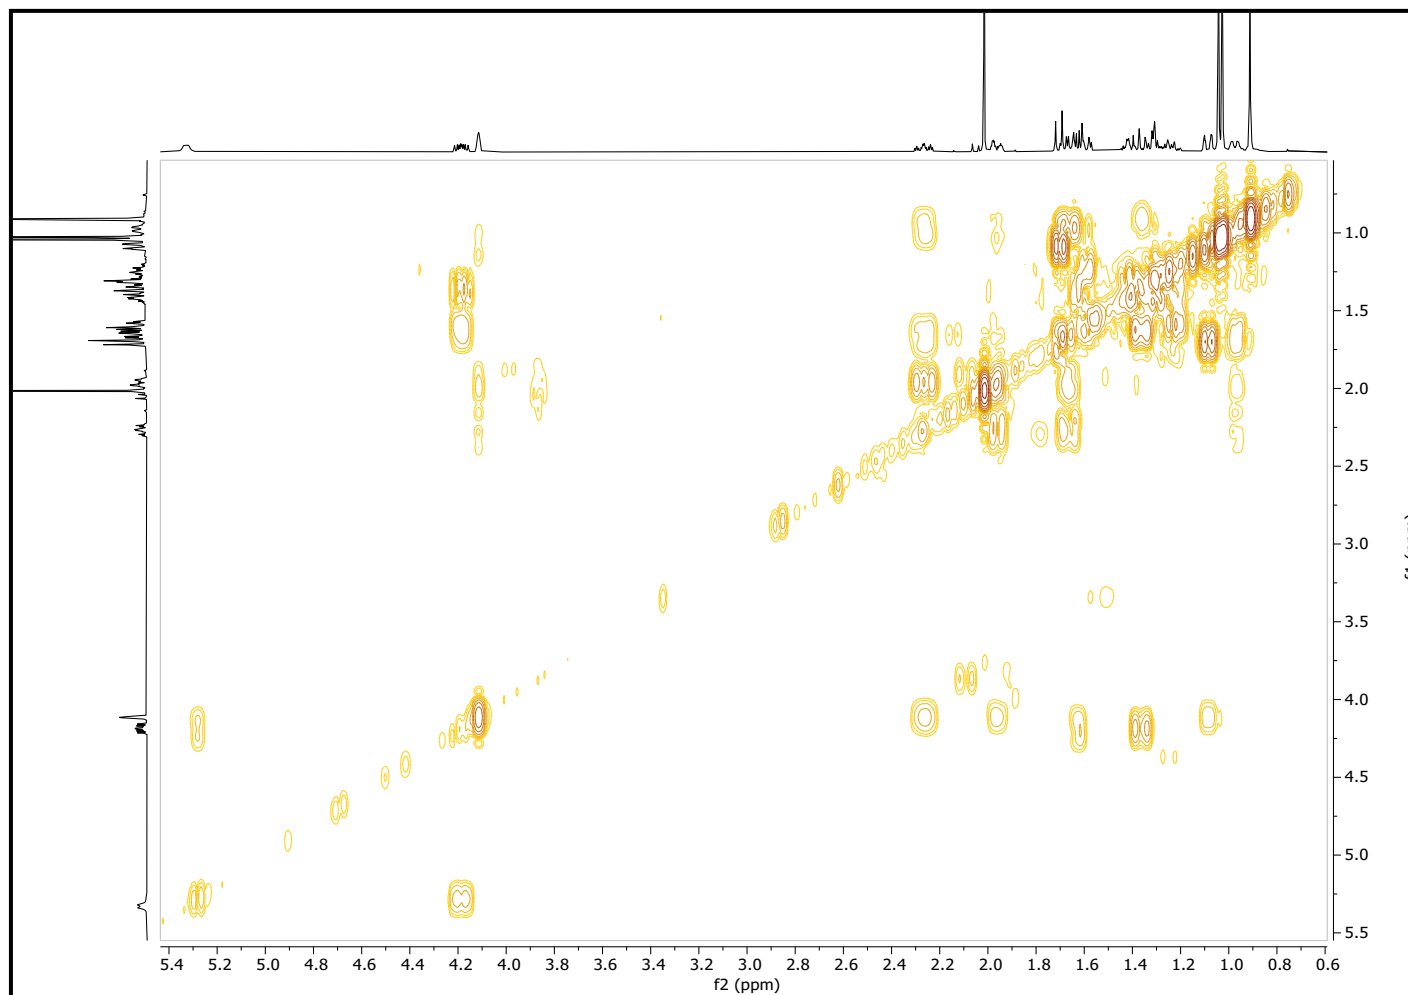

*Figure S13c.  $^1\text{H}$ ,  $^1\text{H}$ -COSY spectrum of  $N$ -(9 $\alpha$ -bromoclovan-2 $\beta$ -yl)acetamide (20) in  $\text{CDCl}_3$ .*

## Supporting Information

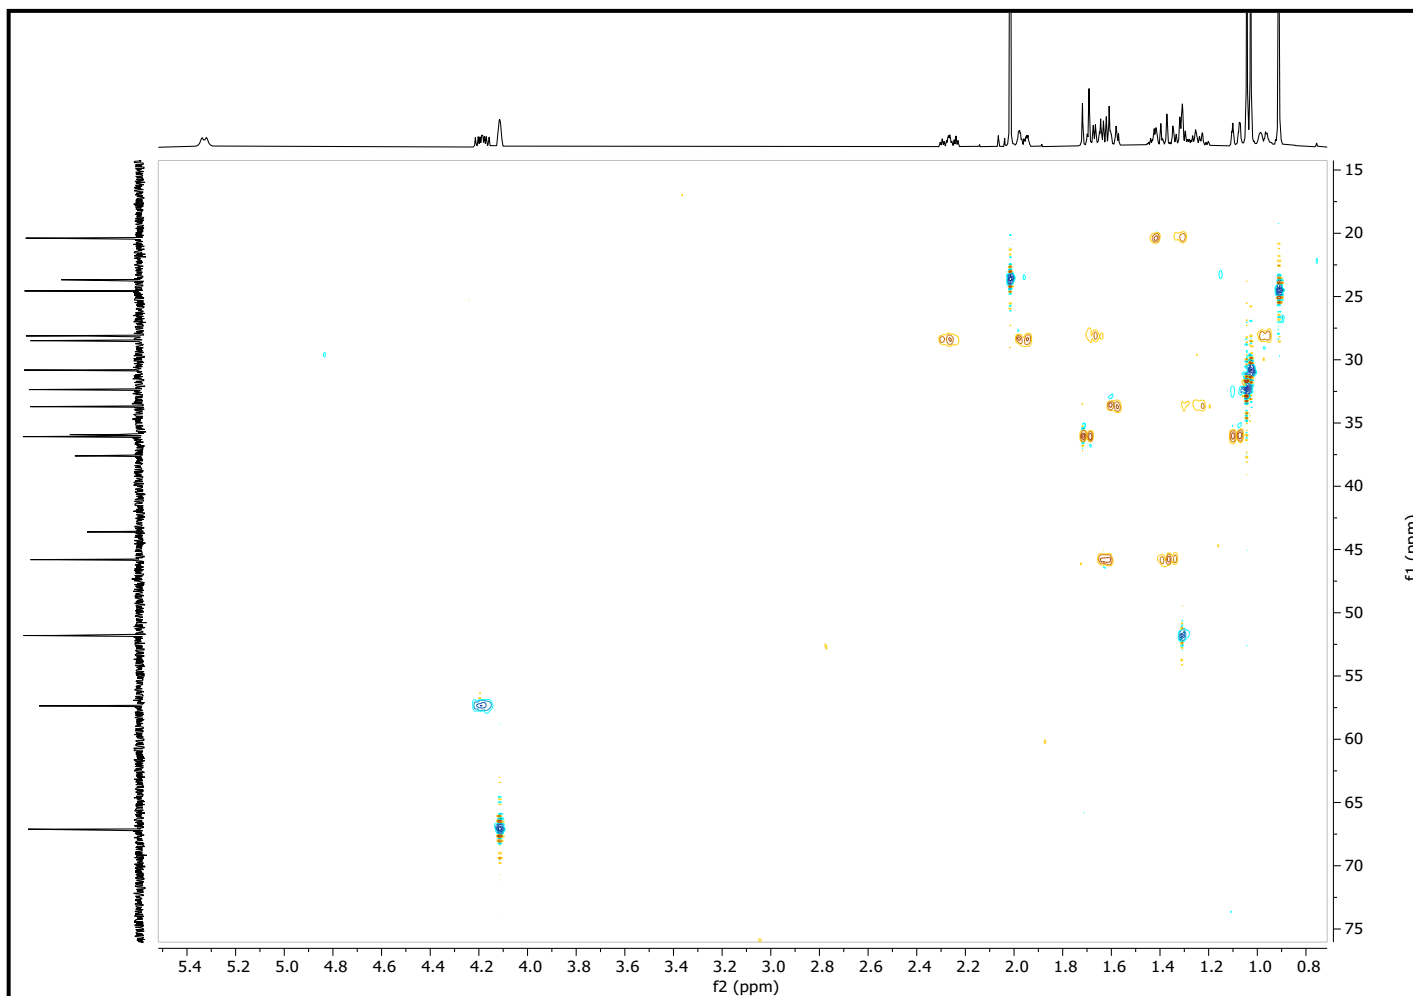

Figure S13d. HSQC spectrum of *N*-(9 $\alpha$ -bromoclovan-2 $\beta$ -yl)acetamide (**20**) in  $CDCl_3$ .

## Supporting Information

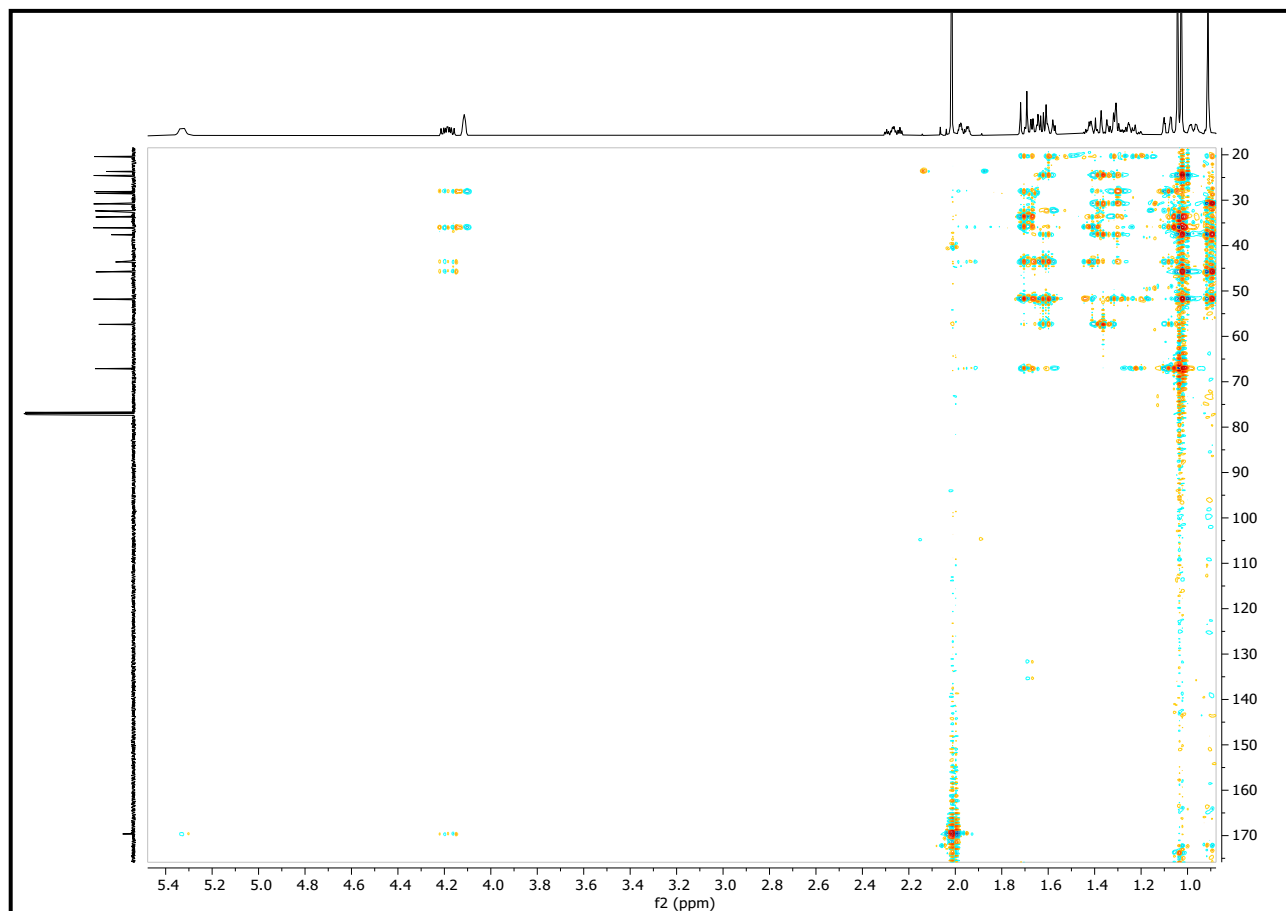

Figure S13e. HMBC spectrum of *N*-(9 $\alpha$ -bromoclovan-2 $\beta$ -yl)acetamide (20) in  $CDCl_3$ .

## Supporting Information

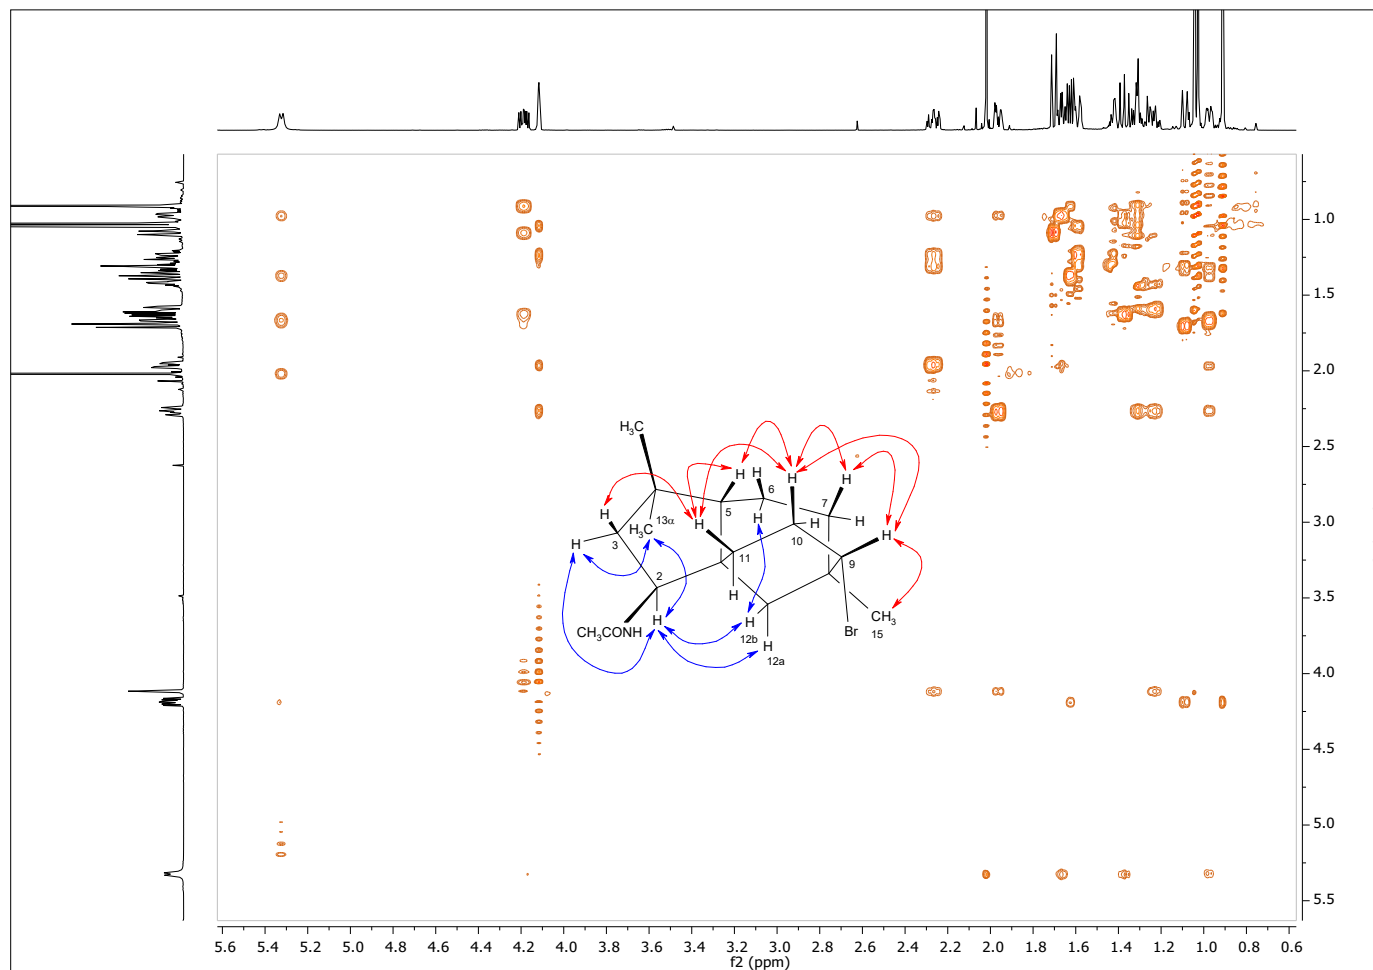

Figure S13f. NOESY2D spectrum of *N*-(9 $\alpha$ -bromoclovan-2 $\beta$ -yl)acetamide (20) in CDCl<sub>3</sub>. Selected NOESY2D correlations for compound 20.

**Table S1. <sup>1</sup>H-NMR spectroscopic data of compounds 8-13.**

|           | <b>8</b>                                                | <b>9</b>                                                   | <b>10</b>                                               | <b>11</b>                                               | <b>12</b>                                                  | <b>13</b>                                                |
|-----------|---------------------------------------------------------|------------------------------------------------------------|---------------------------------------------------------|---------------------------------------------------------|------------------------------------------------------------|----------------------------------------------------------|
| Position  | $\delta_{\text{H}}^{\text{a}}$ , Mult.<br><i>J</i> (Hz) | $\delta_{\text{H}}^{\text{b}}$ , Mult.<br><i>J</i> (Hz)    | $\delta_{\text{H}}^{\text{b}}$ , Mult.<br><i>J</i> (Hz) | $\delta_{\text{H}}^{\text{c}}$ , Mult.<br><i>J</i> (Hz) | $\delta_{\text{H}}^{\text{c}}$ , Mult.<br><i>J</i> (Hz)    | $\delta_{\text{H}}^{\text{b}}$ , Mult.<br><i>J</i> (Hz)  |
| <b>1</b>  | -                                                       | -                                                          | -                                                       | -                                                       | -                                                          | -                                                        |
| <b>2</b>  | $\alpha$ : 4.09, dd (13.0, 6.0)                         | $\alpha$ : 4.16, m                                         | $\alpha$ : 4.17, ddd (12.6, 9.4, 6.0)                   | $\alpha$ : 4.14, ddd (12.5, 9.2, 6.0)                   | $\alpha$ : 4.11, ddd (12.4, 9.4, 6.0)                      | $\alpha$ : 4.38, ddd (12.6, 9.3, 6.0)                    |
| <b>3</b>  | $\alpha$ : 1.45, dd (11.8, 6.0)<br>$\beta$ : 1.53, m    | $\alpha$ : 1.32, m<br>$\beta$ : 1.61, m                    | a: 1.35, m<br>b: 1.61, m                                | $\alpha$ : 1.35, m<br>$\beta$ : 1.62, m                 | $\alpha$ : 1.52, m<br>$\beta$ : 1.19, m                    | $\alpha$ : 1.74, dd (11.6, 6.0)<br>m<br>$\beta$ : 1.5, m |
| <b>4</b>  | -                                                       | -                                                          | -                                                       | -                                                       | -                                                          | -                                                        |
| <b>5</b>  | $\beta$ : 1.43, m                                       | $\beta$ : 1.34, m                                          | $\beta$ : 1.35, m                                       | $\beta$ : 1.35, m                                       | $\beta$ : 1.28, m                                          | $\beta$ : 1.41, m                                        |
| <b>6</b>  | a, b: 1.46, m                                           | a, b: 1.35, m                                              | a, b: 1.40, m                                           | a, b: 1.40, m                                           | a, b: 1.35, m                                              | a, b: 1.45, m                                            |
| <b>7</b>  | $\alpha$ : 1.36, m<br>$\beta$ : 1.10, m                 | a: 1.40, m<br>b: 1.06, m                                   | a: 1.40, m<br>b: 1.07, m                                | a: 1.40, m<br>b: 1.06, m                                | a: 1.35, m<br>b: 1.03, m                                   | a: 1.41, m<br>b: 1.10, m                                 |
| <b>8</b>  | -                                                       | -                                                          | -                                                       | -                                                       | -                                                          | -                                                        |
| <b>9</b>  | $\beta$ : 3.20, s                                       | $\beta$ : 3.28, s                                          | $\beta$ : 3.28, s                                       | $\beta$ : 3.28, d (3.1)                                 | $\beta$ : 3.24, s                                          | $\beta$ : 3.30, d (3.3)                                  |
| <b>10</b> | $\alpha$ : 1.57, m<br>$\beta$ : 1.98, m                 | $\alpha$ : 1.61, m<br>$\beta$ : 1.96, tdd (14.6, 5.0, 3.0) | a: 1.60, m<br>b: 1.96, m                                | a: 1.62, m<br>b: 1.96, tdd (14.6, 5.0, 3.1)             | $\alpha$ : 1.52, m<br>$\beta$ : 1.88, tdd (14.3, 5.0, 3.2) | $\alpha$ : 1.65, m<br>$\beta$ : 2.00, m                  |
| <b>11</b> | a: 1.50, m<br>b: 1.00, m                                | a: 1.47, m<br>b: 0.94, m                                   | a: 1.48, m<br>b: 0.91, m                                | a: 1.46, m<br>b: 0.94, m                                | a: 1.23, m<br>b: 0.69, ddd (10.0, 4.7, 2.4)                | a: 1.59, m<br>b: 1.07, m                                 |
| <b>12</b> | a: 1.54, d (12,4)<br>b: 0.99, d (12,4)                  | a: 1.58, d (12.6)<br>b: 1.06, m                            | a: 1.56, d (13.2)<br>b: 1.07, m                         | a: 1.55, m<br>b: 1.06, m                                | a: 1.52, m<br>b: 1.03, m                                   | a: 1.65, m<br>b: 1.16, m                                 |
| <b>13</b> | $\alpha$ : 0.91, s                                      | $\alpha$ : 0.91, s                                         | $\alpha$ : 0.91, s                                      | $\alpha$ : 0.91, s                                      | $\alpha$ : 0.87, s                                         | $\alpha$ : 0.97, s                                       |
| <b>14</b> | $\beta$ : 1.04, s                                       | $\beta$ : 1.02, s                                          | $\beta$ : 1.02, s                                       | $\beta$ : 1.02, s                                       | $\beta$ : 0.95, s                                          | $\beta$ : 1.07, s                                        |
| <b>15</b> | 0.90, s                                                 | 0.94, s                                                    | 0.94, s                                                 | 0.94, s                                                 | 0.93, s                                                    | 0.96, s                                                  |
| <b>16</b> | -                                                       | 5.3, d (9.4)                                               | 5.3, d (9.4)                                            | 5.5, d (9.0)                                            | 5.23, d (9.4)                                              | 6.00, d (9.3)                                            |
| <b>17</b> | -                                                       | -                                                          | -                                                       | -                                                       | -                                                          | -                                                        |
| <b>18</b> | 1.95, s                                                 | a y b: 2.20, m                                             | a y b: 2.15, m                                          | -                                                       | 3.59, m                                                    | -                                                        |
| <b>19</b> | -                                                       | 1.15, t (7.6)                                              | a y b: 1.67, m                                          | 1.20, s                                                 | -                                                          | 7.76, dd (6.7, 2.8)                                      |
| <b>20</b> | -                                                       | -                                                          | 0.95, t (7.5)                                           | 1.20, s                                                 | 7.27, m                                                    | 7.43, td (6.8, 2.9)                                      |
| <b>21</b> | -                                                       | -                                                          | -                                                       | 1.20, s                                                 | 7.35, m                                                    | 7.49, t (6.8)                                            |
| <b>22</b> | -                                                       | -                                                          | -                                                       | -                                                       | 7.27, m                                                    | 7.43, td (6.8, 2.9)                                      |
| <b>23</b> | -                                                       | -                                                          | -                                                       | -                                                       | 7.35, m                                                    | 7.76, dd (6.7, 2.8)                                      |
| <b>24</b> | -                                                       | -                                                          | -                                                       | -                                                       | 7.27, m                                                    | -                                                        |

<sup>a</sup> CD<sub>3</sub>OD (600 MHz); <sup>b</sup> CDCl<sub>3</sub> (400 MHz); <sup>c</sup> CDCl<sub>3</sub> (500 MHz).

## Supporting Information

**Table S2. <sup>13</sup>C-NMR spectroscopic data of compounds 8-13.**

|           | <b>8</b>              | <b>9</b>              | <b>10</b>             | <b>11</b>             | <b>12</b>             | <b>13</b>             |
|-----------|-----------------------|-----------------------|-----------------------|-----------------------|-----------------------|-----------------------|
| Position  | $\delta_C^a$          | $\delta_C^b$          | $\delta_C^b$          | $\delta_C^c$          | $\delta_C^c$          | $\delta_C^b$          |
| <b>1</b>  | 45.4, C               | 43.5, C               | 43.5, C               | 43.7, C               | 43.8, C               | 44.0, C               |
| <b>2</b>  | 59.0, CH              | 57.4, CH              | 57.4, CH              | 57.3, CH              | 57.6, CH              | 58.0, CH              |
| <b>3</b>  | 46.2, CH <sub>2</sub> | 45.9, CH <sub>2</sub> | 46.0, CH <sub>2</sub> | 45.9, CH <sub>2</sub> | 45.6, CH <sub>2</sub> | 46.0, CH <sub>2</sub> |
| <b>4</b>  | 38.5, C               | 37.6, C               | 37.6, C               | 37.6, C               | 37.6, C               | 37.8, C               |
| <b>5</b>  | 51.9, CH              | 50.6, CH              | 50.6, CH              | 50.6, CH              | 50.5, CH              | 50.7, CH              |
| <b>6</b>  | 21.7, CH <sub>2</sub> | 20.5, CH <sub>2</sub> | 20.6, CH <sub>2</sub> | 20.6, CH <sub>2</sub> | 20.5, CH <sub>2</sub> | 20.6, CH <sub>2</sub> |
| <b>7</b>  | 34.3, CH <sub>2</sub> | 33.1, CH <sub>2</sub> | 33.1, CH <sub>2</sub> | 33.1, CH <sub>2</sub> | 33.0, CH <sub>2</sub> | 33.1, CH <sub>2</sub> |
| <b>8</b>  | 35.9, C               | 34.8, C               | 34.8, C               | 34.8, C               | 34.7, C               | 34.9, C               |
| <b>9</b>  | 75.7, CH              | 75.0, CH              | 75.0, CH              | 74.9, CH              | 74.8, CH              | 75.0, CH              |
| <b>10</b> | 26.6, CH <sub>2</sub> | 25.4, CH <sub>2</sub> | 25.5, CH <sub>2</sub> | 25.5, CH <sub>2</sub> | 25.5, CH <sub>2</sub> | 25.5, CH <sub>2</sub> |
| <b>11</b> | 28.8, CH <sub>2</sub> | 27.6, CH <sub>2</sub> | 27.6, CH <sub>2</sub> | 27.4, CH <sub>2</sub> | 27.1, CH <sub>2</sub> | 27.7, CH <sub>2</sub> |
| <b>12</b> | 37.0, CH <sub>2</sub> | 35.6, CH <sub>2</sub> | 35.5, CH <sub>2</sub> | 35.6, CH <sub>2</sub> | 35.6, CH <sub>2</sub> | 35.7, CH <sub>2</sub> |
| <b>13</b> | 25.0, CH <sub>3</sub> | 24.6, CH <sub>3</sub> | 24.6, CH <sub>3</sub> | 24.6, CH <sub>3</sub> | 24.5, CH <sub>3</sub> | 24.6, CH <sub>3</sub> |
| <b>14</b> | 31.2, CH <sub>3</sub> | 30.9, CH <sub>3</sub> | 30.9, CH <sub>3</sub> | 30.9, CH <sub>3</sub> | 30.8, CH <sub>3</sub> | 30.9, CH <sub>3</sub> |
| <b>15</b> | 29.1, CH <sub>3</sub> | 28.1, CH <sub>3</sub> |
| <b>16</b> | -                     | -                     | -                     | -                     | -                     | -                     |
| <b>17</b> | 172.9, C              | 173.4, C              | 172.5, C              | 178.1, C              | 170.6, C              | 167.1, C              |
| <b>18</b> | 22.7, CH <sub>3</sub> | 29.9, CH <sub>2</sub> | 39.0, CH <sub>2</sub> | 38.8, C               | 44.0, CH <sub>2</sub> | 135.0, C              |
| <b>19</b> | -                     | 9.9, CH <sub>3</sub>  | 19.2, CH <sub>2</sub> | 27.7, CH <sub>3</sub> | 135.2, C              | 126.8, CH             |
| <b>20</b> | -                     | -                     | 13.8, CH <sub>3</sub> | 27.7, CH <sub>3</sub> | 129.4, CH             | 128.5, CH             |
| <b>21</b> | -                     | -                     | -                     | 27.7, CH <sub>3</sub> | 129.0, CH             | 131.3, CH             |
| <b>22</b> |                       |                       |                       |                       | 127.3, C              | 128.5, CH             |
| <b>23</b> |                       |                       |                       |                       | 129.0, C              | 126.8, CH             |
| <b>24</b> |                       |                       |                       |                       | 129.4, CH             |                       |

<sup>a</sup> CD<sub>3</sub>OD (150 MHz); <sup>b</sup> CDCl<sub>3</sub> (100 MHz); <sup>c</sup> CDCl<sub>3</sub> (125 MHz).

## Supporting Information

**Table S3. <sup>1</sup>H-NMR spectroscopic data of compounds 14-19.**

|           | <b>14</b>                                               | <b>15</b>                                               | <b>16</b>                                               | <b>17</b>                                               | <b>18</b>                                               | <b>19</b>                                               |
|-----------|---------------------------------------------------------|---------------------------------------------------------|---------------------------------------------------------|---------------------------------------------------------|---------------------------------------------------------|---------------------------------------------------------|
| Position  | $\delta_{\text{H}}^{\text{a}}$ , Mult.<br><i>J</i> (Hz) | $\delta_{\text{H}}^{\text{b}}$ , Mult.<br><i>J</i> (Hz) | $\delta_{\text{H}}^{\text{c}}$ , Mult.<br><i>J</i> (Hz) | $\delta_{\text{H}}^{\text{b}}$ , Mult.<br><i>J</i> (Hz) | $\delta_{\text{H}}^{\text{d}}$ , Mult.<br><i>J</i> (Hz) | $\delta_{\text{H}}^{\text{b}}$ , Mult.<br><i>J</i> (Hz) |
| <b>1</b>  | -                                                       | -                                                       | -                                                       | -                                                       | -                                                       | -                                                       |
| <b>2</b>  | $\alpha$ : 4.37, ddd (12.4, 9.2, 6.6)                   | $\alpha$ : 4.38, ddd (12.4, 9.0, 6.6)                   | $\alpha$ : 4.,30, dd (12.5, 6.8)                        | $\alpha$ : 4.32, ddd (12.3, 8.8, 6.6)                   | $\alpha$ : 4.27, dd (12.5, 6.7)                         | $\alpha$ : 4.59, ddd (12.1, 8.0, 6.7)                   |
| <b>3</b>  | $\alpha$ :1.76 , m<br>$\beta$ : 1.24, m                 | $\alpha$ : 1.78, m<br>$\beta$ : 1.25, m                 | $\alpha$ : 1.64, m<br>$\beta$ : 1.47, m                 | $\alpha$ : 1.79, m<br>$\beta$ : 1.27, m                 | $\alpha$ : 1.63, m<br>$\beta$ : 1.49, m                 | $\alpha$ : 1.92, dd (11.7, 6.7)<br>$\beta$ : 1.36, m    |
| <b>4</b>  | -                                                       | -                                                       | -                                                       | -                                                       | -                                                       | -                                                       |
| <b>5</b>  | $\beta$ : 1.12, dd (12.8, 3.1)                          | $\beta$ : 1.11, dd (12.5, 3.0)                          | $\beta$ : 1.18 dd (12.8, 3.1)                           | $\beta$ : 1.14, m                                       | $\beta$ : 1.18, dd (12.7, 3.1)                          | $\alpha$ : 1.21, dd (12.5, 2.9)                         |
| <b>6</b>  | a: 1.24, m<br>b: 0.88, m                                | a: 1.25, m<br>b: 0.89, m                                | a: 1.30, m<br>b: 0.92, m                                | a: 1.27, m<br>b: 0.89, m                                | a: 1.28, m<br>b: 0.90, m                                | a: 1.27, m<br>b: 0.94, m                                |
| <b>7</b>  | a: 1.76, m<br>b: 1.04, m                                | a: 1.73, m<br>b: 1.05, m                                | a: 1.76, m<br>b: 1.08, m                                | a: 1.73, m<br>b: 0.99, m                                | a: 1.76, m<br>b: 1.09, m                                | a: 1.77, m<br>b: 1.06, m                                |
| <b>8</b>  | 2.29, t (7.,1)                                          | 2.29, t (7.2)                                           | 2.29, t (7.2)                                           | 2.28, t (7.2)                                           | 2.26, t (7.2)                                           | 2.32, t (7.2)                                           |
| <b>9</b>  | ,                                                       | -                                                       | -                                                       | -                                                       | -                                                       | -                                                       |
| <b>10</b> | 5.64, s                                                 | 5.65, s                                                 | 5.63, t (1.6)                                           | 5.64, s                                                 | 5.59, s                                                 | 5.74, s                                                 |
| <b>11</b> | a: 1.34, m<br>b: 1.24, m                                | a: 1.33, m<br>b: 1.20, m                                | a: 1.,47, m<br>b: 1.12, m                               | a: 1.34, m<br>b: 1.07, m                                | a: 1.41, m<br>b: 1.03, m                                | a: 1.48, d (8.4)<br>b: 1.31, m                          |
| <b>12</b> | a: 1.,76, m<br>b: 1.44, m                               | a: 1.78, m<br>b: 1.43, m                                | a: 1.76, m<br>b: 1.47, m                                | a: 1.79, m<br>b: 1.43, m                                | a: 1.70, m<br>b: 1.41, m                                | a: 1.82, m<br>b: 1.42, m                                |
| <b>13</b> | $\alpha$ : 0.76, s                                      | $\alpha$ : 0.75, s                                      | $\alpha$ : 0.83, s                                      |
| <b>14</b> | $\beta$ : 0.93, s                                       | $\beta$ : 0.93, s                                       | $\beta$ : 0.95, s                                       | $\beta$ : 0.93, s                                       | $\beta$ : 0.94, s                                       | $\beta$ : 0.98, s                                       |
| <b>15</b> | 1.69, d (1.7)                                           | 1.69, d (1.,6)                                          | 1.69, d (1.,6)                                          | 1.69, d (1.6)                                           | 1.66, d (1.6)                                           | 1.73, s                                                 |
| <b>16</b> | 5.31, d (9.2)                                           | 5.28, d (9.0)                                           | -                                                       | 5.48, d (8.8)                                           | -                                                       | 6.00, d (8.0)                                           |
| <b>17</b> | -                                                       | -                                                       | -                                                       | -                                                       | -                                                       | -                                                       |
| <b>18</b> | 1.96, s                                                 | a, b: 2.19, q (7.6)                                     | a, b: 2.15, td (7.3, 1.3)                               | -                                                       | a, b: 3.48, s                                           | -                                                       |
| <b>19</b> | -                                                       | 1.14, t (7.6)                                           | a, b: 1.60, m                                           | 1.18, s                                                 | -                                                       | 7.75, m                                                 |
| <b>20</b> | -                                                       | -                                                       | 0.92, t (7.5)                                           | 1.18, s                                                 | 7.27, m                                                 | 7.40, m                                                 |
| <b>21</b> | -                                                       | -                                                       | -                                                       | 1.18, s                                                 | 7.27, m                                                 | 7.46, m                                                 |
| <b>22</b> | -                                                       | -                                                       | -                                                       | -                                                       | 7.21, m                                                 | 7.40, m                                                 |
| <b>23</b> | -                                                       | -                                                       | -                                                       | -                                                       | 7.27, m                                                 | 7.75, m                                                 |
| <b>24</b> | -                                                       | -                                                       | -                                                       | -                                                       | 7.27, m                                                 | -                                                       |

<sup>a</sup> CDCl<sub>3</sub> (500 MHz); <sup>b</sup> CDCl<sub>3</sub> (400 MHz); <sup>c</sup> CD<sub>3</sub>OD (500 MHz); <sup>d</sup> CD<sub>3</sub>OD (400 MHz)

## Supporting Information

**Table S4. <sup>13</sup>C-NMR spectroscopic data of compounds 14-19.**

|           | <b>14</b>             | <b>15</b>             | <b>16</b>             | <b>17</b>             | <b>18</b>             | <b>19</b>             |
|-----------|-----------------------|-----------------------|-----------------------|-----------------------|-----------------------|-----------------------|
| Position  | $\delta_C^a$ ,        | $\delta_C^b$ ,        | $\delta_C^d$ ,        | $\delta_C^b$ ,        | $\delta_C^d$ ,        | $\delta_C^b$ ,        |
| <b>1</b>  | 47.8, C               | 47.8, C               | 49.7, C               | 47.9, C               | 49.5, C               | 48.3, C               |
| <b>2</b>  | 57.8, CH              | 57.6, CH              | 59.2, CH              | 57.6, CH              | 59.3, CH              | 58.3, CH              |
| <b>3</b>  | 47.8, CH <sub>2</sub> | 47.9, CH <sub>2</sub> | 48.0, CH <sub>2</sub> | 48.0, CH <sub>2</sub> | 47.9, CH <sub>2</sub> | 47.9, CH <sub>2</sub> |
| <b>4</b>  | 38.1, C               | 38.1, C               | 39.1, C               | 38.7, C               | 39.0, C               | 38.3, C               |
| <b>5</b>  | 56.1, CH              | 56.2, CH              | 57.5, CH              | 56.2, CH              | 57.4, CH              | 56.3, CH              |
| <b>6</b>  | 21.3, CH <sub>2</sub> | 21.3, CH <sub>2</sub> | 22.6, CH <sub>2</sub> | 21.3, CH <sub>2</sub> | 22.4, CH <sub>2</sub> | 21.3, CH <sub>2</sub> |
| <b>7</b>  | 30.0, CH <sub>2</sub> | 30.0, CH <sub>2</sub> | 31.2, CH <sub>2</sub> | 30.0, CH <sub>2</sub> | 31.1, CH <sub>2</sub> | 30.0, CH <sub>2</sub> |
| <b>8</b>  | 37.0, CH              | 37.0, CH              | 38.6, CH              | 37.0, CH              | 38.4, CH              | 37.0, CH              |
| <b>9</b>  | 135.3, C              | 135.2, C              | 136.1, C              | 134.9, C              | 136.1, C              | 135.3, C              |
| <b>10</b> | 131.7, CH             | 131.8, CH             | 133.6, CH             | 131.9, CH             | 133.4, CH             | 131.7, CH             |
| <b>11</b> | 32.7, CH <sub>2</sub> | 32.6, CH <sub>2</sub> | 33.8, CH <sub>2</sub> | 32.3, CH <sub>2</sub> | 33.6, CH <sub>2</sub> | 32.7, CH <sub>2</sub> |
| <b>12</b> | 26.6, CH <sub>2</sub> | 26.7, CH <sub>2</sub> | 27.9, CH <sub>2</sub> | 26.7, CH <sub>2</sub> | 27.8, CH <sub>2</sub> | 26.7, CH <sub>2</sub> |
| <b>13</b> | 22.5, CH <sub>3</sub> | 22.5, CH <sub>3</sub> | 23.0, CH <sub>3</sub> | 22.5, CH <sub>3</sub> | 22.8, CH <sub>3</sub> | 22.5, CH <sub>3</sub> |
| <b>14</b> | 28.1, CH <sub>3</sub> | 28.1, CH <sub>3</sub> | 28.5, CH <sub>3</sub> | 28.1, CH <sub>3</sub> | 28.4, CH <sub>3</sub> | 28.1, CH <sub>3</sub> |
| <b>15</b> | 21.9, CH <sub>3</sub> | 22.0, CH <sub>3</sub> | 22.2, CH <sub>3</sub> | 22.0, CH <sub>3</sub> | 22.1, CH <sub>3</sub> | 22.0, CH <sub>3</sub> |
| <b>16</b> | -                     | -                     | -                     | -                     | -                     | -                     |
| <b>17</b> | 169.5, C              | 173.2, C              | 175.9, C              | 177.9, C              | 173.7, C              | 167.0, C              |
| <b>18</b> | 23.5, CH <sub>3</sub> | 29.8, CH <sub>2</sub> | 39.1, CH <sub>2</sub> | 38.7, CH <sub>2</sub> | 43.8, CH <sub>2</sub> | 135.0, C              |
| <b>19</b> | -                     | 9.9, CH <sub>3</sub>  | 20.7, CH <sub>2</sub> | 27.7, CH <sub>3</sub> | 137.2, C              | 126.8, CH             |
| <b>20</b> | -                     | -                     | 14.2, CH <sub>3</sub> | 27.7, CH <sub>3</sub> | 130.1, CH             | 128.5, CH             |
| <b>21</b> | -                     | -                     | -                     | 27.7, CH <sub>3</sub> | 129.5, CH             | 131.2, CH             |
|           |                       |                       |                       |                       | 127.8, C              | 128.5, CH             |
|           |                       |                       |                       |                       | 129.5, CH             | 126.8, CH             |
|           |                       |                       |                       |                       | 130.1, CH             | -                     |

<sup>a</sup> CDCl<sub>3</sub> (125 MHz); <sup>b</sup> CDCl<sub>3</sub> (100 MHz); <sup>c</sup> CD<sub>3</sub>OD (125 MHz); <sup>d</sup> CD<sub>3</sub>OD (100 MHz)

## Supporting Information

**Table S5. Microwave methods for amide preparation.****Table S5.1. Method A**

| <b>N°</b> | <b>t</b> | <b>T1-vessel<br/>(°C)</b> | <b>T2-vessel<br/>(°C)</b> | <b>P (bar)</b> | <b>E (W)</b> |
|-----------|----------|---------------------------|---------------------------|----------------|--------------|
| 1         | 0:00:10  | 60                        | 50                        | 30             | 1000         |
| 2         | 0:01:00  | 60                        | 50                        | 35             | 1000         |
| 3         | 0:00:20  | 60                        | 50                        | 40             | 1000         |

**Table S5.2. Method B**

| <b>N°</b> | <b>t</b> | <b>T1-vessel<br/>(°C)</b> | <b>T2-vessel<br/>(°C)</b> | <b>P (bar)</b> | <b>E (W)</b> |
|-----------|----------|---------------------------|---------------------------|----------------|--------------|
| 1         | 0:00:10  | 80                        | 50                        | 30             | 1000         |
| 2         | 0:01:00  | 80                        | 50                        | 35             | 1000         |
| 3         | 0:00:20  | 80                        | 50                        | 40             | 1000         |

**Table S5.3. Method C**

| <b>N°</b> | <b>t</b> | <b>T1-vessel<br/>(°C)</b> | <b>T2-vessel<br/>(°C)</b> | <b>P (bar)</b> | <b>E (W)</b> |
|-----------|----------|---------------------------|---------------------------|----------------|--------------|
| 1         | 0:00:10  | 120                       | 50                        | 30             | 1000         |
| 2         | 0:01:00  | 120                       | 50                        | 35             | 1000         |
| 3         | 0:00:20  | 120                       | 50                        | 40             | 1000         |

**Table S5.4. Method D**

| <b>N°</b> | <b>t</b> | <b>T1-vessel<br/>(°C)</b> | <b>T2-vessel<br/>(°C)</b> | <b>P (bar)</b> | <b>E (W)</b> |
|-----------|----------|---------------------------|---------------------------|----------------|--------------|
| 1         | 0:00:10  | 100                       | 50                        | 30             | 1000         |
| 2         | 0:01:00  | 120                       | 50                        | 35             | 1000         |
| 3         | 0:02:00  | 140                       | 50                        | 40             | 1000         |
| 4         | 0:00:20  | 140                       | 50                        | 45             | 1000         |

## Supporting Information

**Table S5.5.** Method E

| <b>N°</b> | <b>t</b> | <b>T1-vessel<br/>(°C)</b> | <b>T2-vessel<br/>(°C)</b> | <b>P (bar)</b> | <b>E (W)</b> |
|-----------|----------|---------------------------|---------------------------|----------------|--------------|
| 1         | 0:00:10  | 100                       | 50                        | 30             | 1000         |
| 2         | 0:01:00  | 120                       | 50                        | 35             | 1000         |
| 3         | 0:02:00  | 140                       | 50                        | 40             | 1000         |
| 4         | 0:01:10  | 140                       | 50                        | 45             | 1000         |

**Table S5.6.** Method F

| <b>N°</b> | <b>t</b> | <b>T1-vessel<br/>(°C)</b> | <b>T2-vessel<br/>(°C)</b> | <b>P (bar)</b> | <b>E (W)</b> |
|-----------|----------|---------------------------|---------------------------|----------------|--------------|
| 1         | 0:00:10  | 100                       | 50                        | 30             | 1000         |
| 2         | 0:01:00  | 120                       | 50                        | 35             | 1000         |
| 3         | 0:02:00  | 140                       | 50                        | 40             | 1000         |
| 4         | 0:00:50  | 160                       | 50                        | 45             | 1000         |

**COMPUTATIONAL SECTION****Table S6. Results of the functional, basis set, and solvent tests on the relative free energy (kcal mol<sup>-1</sup>) of the possible isomers of compound **20**.**

| Entry | Functional <sup>a</sup> | Basis set system | Solvent model     | $\Delta G^b$ |            |            |            |
|-------|-------------------------|------------------|-------------------|--------------|------------|------------|------------|
|       |                         |                  |                   | <b>20</b>    | <b>20a</b> | <b>20b</b> | <b>20c</b> |
| 1     | M06-2X (D3)             | 6-311g(d,p)      | SMD(acetone)      | 0.0          | -0.9       | 3.2        | 3.9        |
| 2     | M06-2X (D3)             | 6-311g(d,p)      | PCM(acetone)      | 0.0          | -1.0       | 3.3        | 3.8        |
| 3     | M06-2X (D3)             | 6-311g(d,p)      | SMD(acetonitrile) | 0.0          | -1.0       | 3.2        | 3.9        |
| 4     | M06-2X (D3)             | 6-311g(d,p)      | None              | 0.0          | -1.0       | 3.4        | 3.4        |
| 5     | M06-2X (D3)             | Def2TZVPP        | SMD(acetone)      | 0.0          | -1.2       | 3.6        | 4.1        |
| 6     | wB97XD                  | 6-311g(d,p)      | SMD(acetone)      | 0.0          | -1.6       | 3.0        | 3.9        |
| 7     | PBE0 (D3)               | 6-311g(d,p)      | SMD(acetone)      | 0.0          | -1.0       | 3.8        | 4.1        |
| 8     | B3LYP (D3)              | 6-311g(d,p)      | SMD(acetone)      | 0.0          | -1.3       | 3.1        | 4.1        |

<sup>a</sup> For those functionals including the label "(D3)", Grimme's D3 dispersion correction term was computed by means of a single-point calculation on the optimized species obtained at each level of theory. <sup>b</sup> The structures of the four isomers of **20** were fully optimized using the different methodologies described in the text. Relative free energies were obtained by combining the computed electronic energy, thermal and entropic corrections (298 K), and Grimme's D3 dispersion correction.

Table S6 summarizes the results of a number of tests on the effects of the functional, basis set system, and solvent model, on the relative free energies of the isomers of **20**. It shows that the stability of these species does not vary significantly when other functionals, basis sets, or solvent models are employed. Specifically, entries 1, 6, 7 and 8 of the table shows that changes on the functional only lead to minor energy changes. The effect of the basis set system, ie. 6-311g(d,p) vs. Def2-TZVPP, which can be analyzed by comparing entry 1 (level of theory used in the manuscript) with entry 5, again shows only minor energy differences. Finally, in relation to the solvent model and selected solvent, comparison of entries 1-4 shows that none of them leads to major energy changes. All in all, the computations suggest that **20a** is ca. 1 kcal/mol more stable than **20**, whereas isomer **20b** and **20c** are ca. 3-4 kcal/mol less stable than **20**.

**Table S7. Computational analysis of the solvent effects on the relative free energy (kcal mol<sup>-1</sup>) of the ion pair formed between 22<sup>+</sup> and Br<sup>-</sup>.**

| Entry | Functional  | Basis set system | Solvent model                         | $\Delta G^a$ |
|-------|-------------|------------------|---------------------------------------|--------------|
| 1     | M06-2X (D3) | 6-311g(d,p)      | SMD(acetone, $\epsilon=20.493$ )      | +19.5        |
| 2     | M06-2X (D3) | 6-311g(d,p)      | SMD(acetonitrile, $\epsilon=35.688$ ) | +18.9        |
| 3     | M06-2X (D3) | 6-311g(d,p)      | SMD(water, $\epsilon=78.3553$ )       | +19.2        |

<sup>a</sup> The structures were fully optimized using the different methodologies shown in the table. Free energy values are given with respect to compound **20**.

Table S7 shows that the relative stability of the ion pair formed between **22<sup>+</sup>** and Br<sup>-</sup> does not change significantly in solvents such as acetone, acetonitrile, and water.

**Table S8. QTAIM topological properties of selected bond critical points (bcp) of TS<sub>dvo</sub>.<sup>a</sup>**

| bcp   | Label | $\rho(r)$ | $\nabla^2\rho(r)$ | $H(r)$  | $G(r)$ |
|-------|-------|-----------|-------------------|---------|--------|
| Br-C9 | bcp1  | 0.0102    | 0.0297            | 0.0012  | 0.0062 |
| C8-C9 | bcp2  | 0.3151    | -0.9071           | -0.3304 | 0.1037 |
| C7-C8 | bcp3  | 0.1238    | 0.0107            | -0.0507 | 0.0534 |
| C7-H  | bcp4  | 0.2750    | -0.9259           | -0.2708 | 0.0393 |

<sup>a</sup> ( $\rho(r)$  = electron density,  $\nabla^2\rho(r)$  = Laplacian of electron density;  $H(r)$  local energy density;  $G(r)$  = local kinetic (Lagrangian) energy).

## Supporting Information

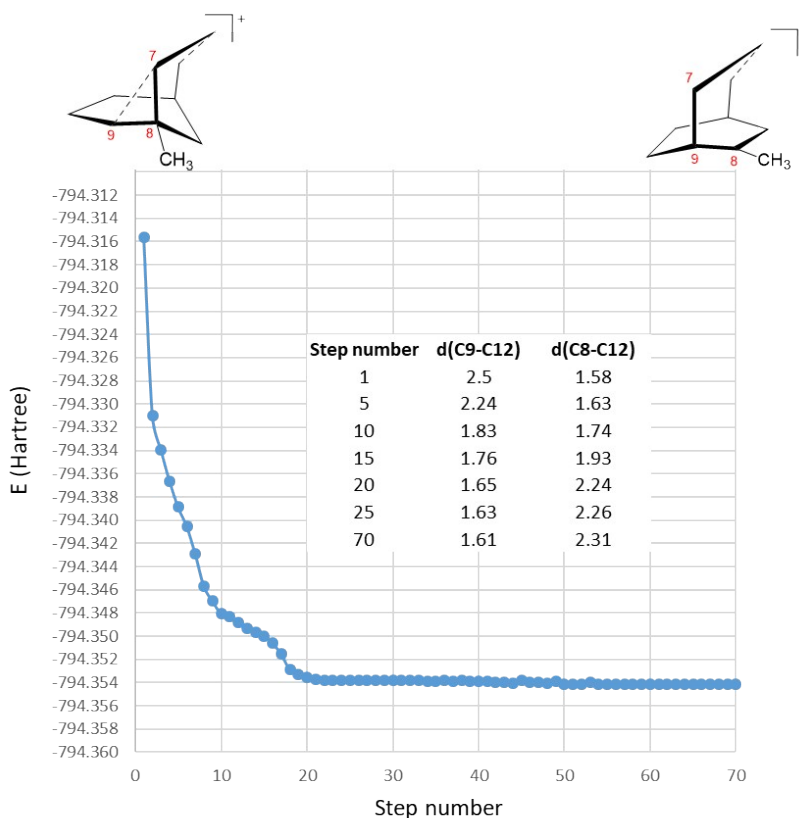

**Figure S14. Optimisation (M06-2X/6-311g(d,p), SMD(acetone)) trajectory from the secondary carbocation guess structure labelled as  $21^+$  in Scheme 3, into the optimised structure of the tertiary carbocation  $22^+$ . For simplicity, some of the substituents were removed in the representations.**

The graph shows how the optimisation of an initial guess structure of the secondary carbocation evolves into  $22^+$  without any barrier. It is worth noting that our initial guess geometry was obtained by optimizing the structure resulting after removing the bromide atom in **20**, while keeping the  $C7\cdots C9$  distance fixed at a distance long enough (2.50 Å) to avoid bonding interactions between those centers. As expected, once such constraint is eliminated, the optimization trajectory in Figure S14 shows the cleavage of the  $C7-C8$  bond and the formation of a new  $C7\cdots C9$  bond in the final structure. While the optimized structure of  $22^+$  is included in the Cartesian Coordinates section, those of the initial guess (step number 1) together with step numbers 5, 10, 15, 20 and 25 are included below.

*Cartesian coordinates of the initial guess structure (step 1):*

```

C      -0.24402200  -1.11563500   1.09769200
C       0.11163200  -0.17949700  -0.07021700
C       1.04935600  -0.93631000  -1.01472100
C       2.36004400  -1.30965900  -0.30230000
C       2.04525200  -2.21258800   0.90295300
C       0.99548500  -1.61973200   1.83619400
C       0.78557200   1.13926200   0.44430300
C      -0.14764500   2.32699700   0.04710000
C      -1.51407300   1.63728200  -0.10577400
C      -1.16218100   0.32360700  -0.80471400
C       3.04183400  -0.00710400   0.27632700

```

## Supporting Information

|   |             |             |             |
|---|-------------|-------------|-------------|
| C | 2.24182300  | 1.26034400  | -0.01108600 |
| C | 0.26017600  | 3.00123200  | -1.27003700 |
| C | -0.17840800 | 3.39115100  | 1.14382400  |
| C | 3.32305600  | -1.97432900 | -1.28478800 |
| H | 1.47137200  | -0.79186900 | 2.37097000  |
| H | 0.71742300  | -2.35337200 | 2.59473900  |
| H | -0.79626900 | -1.97482700 | 0.70248100  |
| H | -0.90896200 | -0.60556200 | 1.79885300  |
| H | 2.70848900  | -3.01166400 | 1.23360900  |
| H | 3.18821500  | -0.10255700 | 1.35593100  |
| H | 4.04151900  | 0.08702700  | -0.15504600 |
| H | 1.27943900  | -0.32607200 | -1.89429200 |
| H | 4.22368000  | -2.32649400 | -0.77150300 |
| H | 2.86132400  | -2.82382600 | -1.79129200 |
| H | 3.62729800  | -1.24790200 | -2.04368700 |
| H | 2.72175700  | 2.10999800  | 0.48509700  |
| H | 2.28449100  | 1.46258200  | -1.08440000 |
| H | -0.86453300 | 0.56429400  | -1.82904400 |
| H | -2.22890900 | 2.23633700  | -0.67782500 |
| H | -1.94480300 | 1.43143800  | 0.87478200  |
| H | 1.21187400  | 3.52895300  | -1.16473700 |
| H | 0.36573500  | 2.29308900  | -2.09597500 |
| H | -0.49799500 | 3.73765500  | -1.55301200 |
| H | -0.51811400 | 2.96428800  | 2.09176200  |
| H | 0.81664800  | 3.82068800  | 1.29960100  |
| H | -0.85635900 | 4.20788300  | 0.87586900  |
| H | 0.78873800  | 1.10200900  | 1.54018300  |
| H | 0.55716700  | -1.84601200 | -1.37767300 |
| N | -2.23826700 | -0.64819000 | -0.96695600 |
| H | -2.22686100 | -1.17413400 | -1.82815500 |
| C | -3.21440900 | -0.96649800 | -0.08179300 |
| O | -3.35156900 | -0.44384700 | 1.01468000  |
| C | -4.15035800 | -2.06578200 | -0.54077900 |
| H | -4.07683000 | -2.28045100 | -1.60685700 |
| H | -3.91188400 | -2.97248000 | 0.02089100  |
| H | -5.17202900 | -1.77736000 | -0.29315400 |

*Cartesian coordinates at step 5:*

|   |             |             |             |
|---|-------------|-------------|-------------|
| C | -0.25199200 | -1.10022000 | 1.09811900  |
| C | 0.10225100  | -0.19420700 | -0.08681700 |
| C | 1.01270100  | -0.98111000 | -1.02998600 |
| C | 2.34908900  | -1.32404500 | -0.33485400 |
| C | 2.17274000  | -1.83825900 | 0.99506100  |
| C | 1.00715900  | -1.60379000 | 1.81933400  |
| C | 0.79026200  | 1.12770200  | 0.39994300  |
| C | -0.16604600 | 2.31331000  | 0.04383100  |
| C | -1.52789700 | 1.61202000  | -0.09251100 |
| C | -1.17882300 | 0.30671000  | -0.80986900 |
| C | 3.07844900  | 0.04124400  | 0.17607900  |
| C | 2.21623000  | 1.26151900  | -0.13224900 |
| C | 0.20200500  | 3.01952700  | -1.26869400 |
| C | -0.17854500 | 3.35265600  | 1.16420500  |
| C | 3.30363900  | -2.13865200 | -1.20126500 |
| H | 1.41416200  | -0.79932200 | 2.47822900  |
| H | 0.85296900  | -2.43022800 | 2.51507500  |

## Supporting Information

|   |             |             |             |
|---|-------------|-------------|-------------|
| H | -0.80487200 | -1.97056400 | 0.73382400  |
| H | -0.89295200 | -0.58274500 | 1.81118700  |
| H | 3.01751300  | -2.36192400 | 1.44931000  |
| H | 3.32316800  | 0.01130800  | 1.24378000  |
| H | 4.02716800  | 0.05260900  | -0.36110800 |
| H | 1.22818700  | -0.42069400 | -1.94253000 |
| H | 4.23459900  | -2.34391700 | -0.66833800 |
| H | 2.84014600  | -3.08450100 | -1.48762200 |
| H | 3.53368400  | -1.57367500 | -2.10662600 |
| H | 2.70622300  | 2.13053600  | 0.31783200  |
| H | 2.20652600  | 1.42046700  | -1.21103300 |
| H | -0.88237100 | 0.55683800  | -1.83141000 |
| H | -2.25571300 | 2.20873900  | -0.64922300 |
| H | -1.94187500 | 1.39366200  | 0.89279000  |
| H | 1.15794900  | 3.54282300  | -1.18228100 |
| H | 0.27344100  | 2.33491800  | -2.11740300 |
| H | -0.56365200 | 3.76470700  | -1.50246900 |
| H | -0.49184000 | 2.90276000  | 2.11040900  |
| H | 0.81644300  | 3.78750800  | 1.30387500  |
| H | -0.86967700 | 4.16773500  | 0.92860800  |
| H | 0.84748900  | 1.09051600  | 1.49447600  |
| H | 0.53739900  | -1.92135700 | -1.32595500 |
| N | -2.25031300 | -0.66608200 | -0.96581000 |
| H | -2.29535300 | -1.13720600 | -1.85721300 |
| C | -3.20107200 | -0.99428100 | -0.05435500 |
| O | -3.26130100 | -0.52067800 | 1.07023900  |
| C | -4.19991300 | -2.03160600 | -0.52112100 |
| H | -4.18295800 | -2.19461400 | -1.59840000 |
| H | -3.97855600 | -2.97425500 | -0.01467100 |
| H | -5.19605600 | -1.71322400 | -0.21347000 |

*Cartesian coordinates at step 10:*

|   |             |             |             |
|---|-------------|-------------|-------------|
| C | -0.25210900 | -1.21565900 | 0.99708500  |
| C | 0.07733500  | -0.20805900 | -0.11466600 |
| C | 1.01200400  | -0.90112100 | -1.10999100 |
| C | 2.28860400  | -1.39212600 | -0.44471600 |
| C | 2.23578500  | -1.75016700 | 0.90871100  |
| C | 1.00604200  | -1.69079600 | 1.74672400  |
| C | 0.74520400  | 1.07807000  | 0.47520600  |
| C | -0.10894600 | 2.29573600  | 0.01523900  |
| C | -1.49985400 | 1.65953600  | -0.14178500 |
| C | -1.20192100 | 0.32140600  | -0.82428500 |
| C | 2.97266900  | -0.11777700 | 0.51991800  |
| C | 2.23159800  | 1.15953000  | 0.13564400  |
| C | 0.37075600  | 2.89387500  | -1.31394100 |
| C | -0.11301100 | 3.39672200  | 1.07481900  |
| C | 3.34332900  | -1.94988900 | -1.36115400 |
| H | 1.20553000  | -1.09363700 | 2.63880300  |
| H | 0.87141100  | -2.71770000 | 2.10871900  |
| H | -0.74233400 | -2.08234700 | 0.54468600  |
| H | -0.95942800 | -0.77956600 | 1.70256000  |
| H | 3.10324800  | -2.25249400 | 1.33263100  |
| H | 3.00695900  | -0.18088400 | 1.61616400  |
| H | 4.01063900  | -0.18682800 | 0.20430300  |
| H | 1.27508500  | -0.24458300 | -1.94418500 |

## Supporting Information

|   |             |             |             |
|---|-------------|-------------|-------------|
| H | 4.23041700  | -2.26069100 | -0.80793100 |
| H | 2.92027100  | -2.81675800 | -1.87348400 |
| H | 3.62043400  | -1.20628800 | -2.11024300 |
| H | 2.70923400  | 1.97606000  | 0.68366900  |
| H | 2.38541600  | 1.34319100  | -0.92805300 |
| H | -0.92739700 | 0.53882300  | -1.85925100 |
| H | -2.18169200 | 2.27986500  | -0.73014700 |
| H | -1.94444400 | 1.48834600  | 0.83897400  |
| H | 1.34062800  | 3.38456100  | -1.19579400 |
| H | 0.47202300  | 2.14702500  | -2.10594200 |
| H | -0.34328800 | 3.64981200  | -1.65264100 |
| H | -0.48997300 | 3.01859200  | 2.02904400  |
| H | 0.89633200  | 3.78892500  | 1.23532000  |
| H | -0.74927700 | 4.23036700  | 0.76259900  |
| H | 0.65843800  | 1.02658100  | 1.56709400  |
| H | 0.52288700  | -1.78215300 | -1.53951900 |
| N | -2.30579900 | -0.62414100 | -0.94184500 |
| H | -2.40870400 | -1.07084200 | -1.84085700 |
| C | -3.24963900 | -0.91847300 | -0.01160600 |
| O | -3.26932300 | -0.45695700 | 1.12006200  |
| C | -4.28357700 | -1.93005400 | -0.45622200 |
| H | -4.27735900 | -2.11126200 | -1.53062800 |
| H | -4.08816800 | -2.87046000 | 0.06480400  |
| H | -5.26732900 | -1.57555000 | -0.14814600 |

*Cartesian coordinates at step 15:*

|   |             |             |             |
|---|-------------|-------------|-------------|
| C | -0.28964600 | -1.28284000 | 0.92520300  |
| C | 0.05641500  | -0.22799900 | -0.12838600 |
| C | 0.99562500  | -0.87740400 | -1.14318500 |
| C | 2.22155200  | -1.46147900 | -0.51625300 |
| C | 2.21119600  | -1.80244400 | 0.82509400  |
| C | 0.94421400  | -1.79587800 | 1.66767900  |
| C | 0.73999800  | 1.01943800  | 0.51964000  |
| C | -0.03423200 | 2.27165300  | 0.02190200  |
| C | -1.44927500 | 1.70062400  | -0.15676400 |
| C | -1.20940300 | 0.35217300  | -0.84178900 |
| C | 2.94524400  | -0.21380700 | 0.77424500  |
| C | 2.24568600  | 1.04835200  | 0.26970000  |
| C | 0.50329000  | 2.80646100  | -1.31354600 |
| C | -0.00322900 | 3.39571500  | 1.05374100  |
| C | 3.35251000  | -1.78019300 | -1.43774400 |
| H | 1.14208300  | -1.22220700 | 2.57618600  |
| H | 0.79040600  | -2.82974100 | 1.97435600  |
| H | -0.78590400 | -2.11696200 | 0.42221900  |
| H | -1.00087600 | -0.86920700 | 1.64125300  |
| H | 3.03226100  | -2.40857800 | 1.19103700  |
| H | 2.92290000  | -0.20437400 | 1.86786900  |
| H | 3.97848000  | -0.31364300 | 0.46303300  |
| H | 1.28218600  | -0.18880400 | -1.94228900 |
| H | 4.18332700  | -2.26140400 | -0.92342700 |
| H | 2.95773800  | -2.46253000 | -2.19662500 |
| H | 3.69486100  | -0.88049300 | -1.95432800 |
| H | 2.70526400  | 1.88156000  | 0.80756100  |
| H | 2.46517300  | 1.19414800  | -0.78953900 |
| H | -0.93136900 | 0.54535100  | -1.88065200 |

## Supporting Information

|   |             |             |             |
|---|-------------|-------------|-------------|
| H | -2.10041800 | 2.35229800  | -0.74529100 |
| H | -1.90911100 | 1.53619500  | 0.81859900  |
| H | 1.46839500  | 3.30279200  | -1.17895400 |
| H | 0.63780800  | 2.01884900  | -2.05844900 |
| H | -0.19520900 | 3.54232000  | -1.72220700 |
| H | -0.43911700 | 3.06917700  | 2.00212100  |
| H | 1.02232500  | 3.72791800  | 1.24168600  |
| H | -0.57247300 | 4.25976000  | 0.69711400  |
| H | 0.57745800  | 0.96276100  | 1.60341700  |
| H | 0.49430600  | -1.72909400 | -1.62439500 |
| N | -2.35651800 | -0.54102600 | -0.94480200 |
| H | -2.46940700 | -1.01209500 | -1.83011200 |
| C | -3.28758500 | -0.82222100 | 0.00161900  |
| O | -3.28103300 | -0.36512900 | 1.13528000  |
| C | -4.34046000 | -1.82323300 | -0.42505500 |
| H | -4.33136100 | -2.03296500 | -1.49427200 |
| H | -4.16802800 | -2.75293400 | 0.12226100  |
| H | -5.31922500 | -1.44138800 | -0.13342600 |

*Cartesian coordinates at step 20:*

|   |             |             |             |
|---|-------------|-------------|-------------|
| C | -0.27085600 | -1.29928100 | 0.92747500  |
| C | 0.04538300  | -0.25119000 | -0.14541700 |
| C | 0.93917600  | -0.95377800 | -1.18101900 |
| C | 2.15627600  | -1.53698400 | -0.59880200 |
| C | 2.28385100  | -1.60984200 | 0.82773500  |
| C | 1.01040600  | -1.73551200 | 1.66182300  |
| C | 0.73474200  | 0.99991900  | 0.49467200  |
| C | -0.01817900 | 2.24725800  | -0.04443700 |
| C | -1.44288000 | 1.69592200  | -0.21480400 |
| C | -1.22044200 | 0.32177300  | -0.85088300 |
| C | 2.97423000  | -0.13755500 | 0.98805700  |
| C | 2.25518000  | 1.03777500  | 0.32540800  |
| C | 0.54825800  | 2.74217500  | -1.38151300 |
| C | 0.01617200  | 3.39553200  | 0.96251800  |
| C | 3.28625500  | -1.87028600 | -1.47186900 |
| H | 1.13580500  | -1.15325700 | 2.57568700  |
| H | 0.91409700  | -2.77898700 | 1.97263400  |
| H | -0.73398000 | -2.16434000 | 0.44309800  |
| H | -0.99500800 | -0.90226500 | 1.63880700  |
| H | 3.07321900  | -2.29280700 | 1.13928200  |
| H | 2.96059300  | -0.04140000 | 2.07372700  |
| H | 4.00327200  | -0.21838300 | 0.63942900  |
| H | 1.20219600  | -0.33738000 | -2.04693400 |
| H | 4.12776700  | -2.29912000 | -0.93328300 |
| H | 2.92079000  | -2.56639600 | -2.23700600 |
| H | 3.58508800  | -0.96658900 | -2.01670700 |
| H | 2.64946800  | 1.95377900  | 0.77567100  |
| H | 2.51541100  | 1.08046300  | -0.73608000 |
| H | -0.96002000 | 0.48976300  | -1.89852000 |
| H | -2.07431100 | 2.33678500  | -0.83645800 |
| H | -1.91396600 | 1.58408000  | 0.76235700  |
| H | 1.53315800  | 3.19582100  | -1.24250700 |
| H | 0.65492700  | 1.94289800  | -2.12034600 |
| H | -0.11154200 | 3.50627500  | -1.80248700 |
| H | -0.41846400 | 3.08865000  | 1.91791000  |

## Supporting Information

|   |             |             |             |
|---|-------------|-------------|-------------|
| H | 1.04267100  | 3.72961600  | 1.14341000  |
| H | -0.55196200 | 4.25290900  | 0.58917000  |
| H | 0.52487400  | 0.95637500  | 1.57088100  |
| H | 0.39898200  | -1.82887600 | -1.58813500 |
| N | -2.37029500 | -0.57031900 | -0.91141100 |
| H | -2.48916400 | -1.08199000 | -1.77303900 |
| C | -3.29027300 | -0.80182300 | 0.05892000  |
| O | -3.28275600 | -0.26321200 | 1.15617700  |
| C | -4.37326300 | -1.79027900 | -0.31534000 |
| H | -4.35338900 | -2.08130900 | -1.36520400 |
| H | -4.24918200 | -2.68017800 | 0.30582700  |
| H | -5.34143900 | -1.34916300 | -0.07586900 |

*Cartesian coordinates at step 25:*

|   |             |             |             |
|---|-------------|-------------|-------------|
| C | -0.26183800 | -1.29506900 | 0.93198800  |
| C | 0.05119100  | -0.24735800 | -0.14040300 |
| C | 0.95433400  | -0.93717400 | -1.17252700 |
| C | 2.17597000  | -1.52033700 | -0.60014400 |
| C | 2.30086200  | -1.60235000 | 0.82680000  |
| C | 1.01672600  | -1.75338800 | 1.65254900  |
| C | 0.72633400  | 1.01049100  | 0.50103900  |
| C | -0.03140800 | 2.25121100  | -0.04388700 |
| C | -1.45125200 | 1.69029000  | -0.21913300 |
| C | -1.21939200 | 0.31571100  | -0.85181400 |
| C | 2.96398100  | -0.12354200 | 0.99480400  |
| C | 2.24454200  | 1.05415200  | 0.33362800  |
| C | 0.53521100  | 2.74318100  | -1.38242900 |
| C | -0.00584600 | 3.40371400  | 0.95775200  |
| C | 3.28769600  | -1.87852900 | -1.48726100 |
| H | 1.15383600  | -1.20015600 | 2.58322300  |
| H | 0.92607900  | -2.80642100 | 1.92417400  |
| H | -0.74333200 | -2.15121400 | 0.45051400  |
| H | -0.97296900 | -0.88857100 | 1.65086400  |
| H | 3.08896700  | -2.28675600 | 1.13676900  |
| H | 2.94503700  | -0.02037500 | 2.08191400  |
| H | 4.00130300  | -0.18162700 | 0.66600700  |
| H | 1.21194300  | -0.31748400 | -2.03775500 |
| H | 4.14034800  | -2.29308300 | -0.95490900 |
| H | 2.90027600  | -2.60656600 | -2.21209100 |
| H | 3.57550900  | -1.00092700 | -2.07732300 |
| H | 2.63857600  | 1.96851300  | 0.78618000  |
| H | 2.50495300  | 1.10122300  | -0.72806900 |
| H | -0.95588100 | 0.47786500  | -1.89953100 |
| H | -2.08512200 | 2.32578700  | -0.84355700 |
| H | -1.92537400 | 1.57396800  | 0.75629100  |
| H | 1.51771000  | 3.20275100  | -1.24488700 |
| H | 0.64608800  | 1.94138400  | -2.11761500 |
| H | -0.12886500 | 3.50115700  | -1.80785100 |
| H | -0.44178400 | 3.09966900  | 1.91351200  |
| H | 1.01810500  | 3.74459400  | 1.13955800  |
| H | -0.57781200 | 4.25596000  | 0.57826600  |
| H | 0.51207600  | 0.96808400  | 1.57662900  |
| H | 0.42063900  | -1.81282600 | -1.58837800 |
| N | -2.36766300 | -0.57884900 | -0.91189100 |
| H | -2.50929800 | -1.06011600 | -1.78724500 |

## Supporting Information

|   |             |             |             |
|---|-------------|-------------|-------------|
| C | -3.28655900 | -0.81270700 | 0.05902200  |
| O | -3.25681300 | -0.30408900 | 1.17007200  |
| C | -4.37842100 | -1.78976900 | -0.32080800 |
| H | -4.37289300 | -2.05898200 | -1.37667100 |
| H | -4.25137700 | -2.69319500 | 0.27985800  |
| H | -5.34137300 | -1.34916700 | -0.06026900 |

## Supporting Information

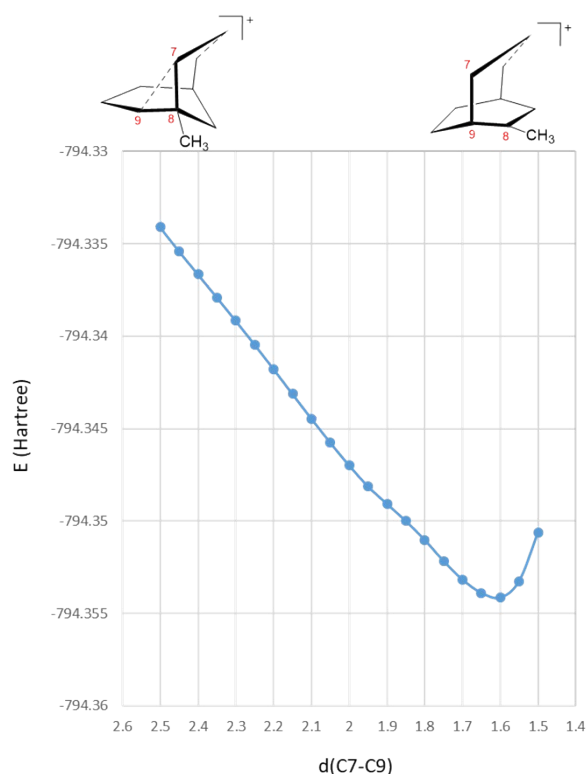

**Figure S15. Relaxed scan (M06-2X/6-311g(d,p), SMD(acetone)) along the C7-C9 coordinate in carbocation 22<sup>+</sup>. This graph is analogous to that included in Figure 2 of the manuscript, but herein absolute energies were employed. For simplicity, some of the substituents were removed in the representations.**

Specifically, the graph shows how a relaxed scan along the C7-C9 coordinate, with distances shown in reverse order between 2.50 Å and 1.50 Å, in steps of 0.05 Å. This graph is also complementary to that in Figure S14, all in all showing that the hypothetical secondary carbocation 21<sup>+</sup> is not a stable structure that can be optimized, as it collapses into 22<sup>+</sup>, with a C9-C12 distance of ca. 1.6 Å.

The Cartesian coordinates of a number of points along this relaxed scan, specifically those with d(C7-C9) distances of 2.40, 2.20, 2.00 and 1.80 Å are included below.

*Cartesian coordinates of the optimized structure with C9-C12 distance constrained at 2.40 Å:*

|   |             |             |             |
|---|-------------|-------------|-------------|
| C | -0.23021900 | -1.03708600 | 1.17125000  |
| C | 0.11476800  | -0.19019800 | -0.06122000 |
| C | 1.00184100  | -1.03478600 | -0.97875900 |
| C | 2.34801500  | -1.32728800 | -0.30134600 |
| C | 2.16975400  | -1.83992800 | 1.04307400  |
| C | 1.01845100  | -1.57322900 | 1.86789900  |
| C | 0.82709400  | 1.14353600  | 0.35394800  |
| C | -0.17166900 | 2.31704600  | 0.06806700  |
| C | -1.52711400 | 1.59940300  | -0.06421000 |
| C | -1.16320000 | 0.30164400  | -0.78643300 |
| C | 3.11316900  | 0.10652400  | 0.00322700  |
| C | 2.19852700  | 1.28389500  | -0.30594000 |
| C | 0.14451600  | 3.07877100  | -1.22638200 |
| C | -0.17636100 | 3.31299500  | 1.22742500  |

## Supporting Information

|   |             |             |             |
|---|-------------|-------------|-------------|
| C | 3.27567100  | -2.20859400 | -1.13890300 |
| H | 1.45950800  | -0.83602400 | 2.57876700  |
| H | 0.84410600  | -2.42947800 | 2.53031600  |
| H | -0.83722000 | -1.89066300 | 0.85928800  |
| H | -0.82578600 | -0.46547400 | 1.88361600  |
| H | 3.00766300  | -2.36907400 | 1.49839100  |
| H | 3.46171900  | 0.15499400  | 1.03925500  |
| H | 3.99480800  | 0.07774300  | -0.63656100 |
| H | 1.19245200  | -0.52410500 | -1.92573700 |
| H | 4.22963900  | -2.36456900 | -0.63070400 |
| H | 2.81307900  | -3.17852600 | -1.33226500 |
| H | 3.46419300  | -1.71552800 | -2.09465200 |
| H | 2.69661500  | 2.19044200  | 0.05195600  |
| H | 2.09379400  | 1.38402400  | -1.38759900 |
| H | -0.86033800 | 0.56487400  | -1.80352700 |
| H | -2.25964200 | 2.19024200  | -0.62097300 |
| H | -1.94142500 | 1.37659700  | 0.91923400  |
| H | 1.11044800  | 3.58678700  | -1.16463500 |
| H | 0.16445400  | 2.42962700  | -2.10558000 |
| H | -0.62175200 | 3.84165600  | -1.39049500 |
| H | -0.44019600 | 2.81647300  | 2.16548700  |
| H | 0.80922200  | 3.77416800  | 1.34945400  |
| H | -0.90134200 | 4.11313200  | 1.04934400  |
| H | 0.99029300  | 1.11825500  | 1.43775200  |
| H | 0.50709900  | -1.98283600 | -1.21472900 |
| N | -2.22311100 | -0.68240900 | -0.96661600 |
| H | -2.26905200 | -1.12120100 | -1.87424500 |
| C | -3.19711200 | -1.01321300 | -0.08124700 |
| O | -3.27622600 | -0.55923600 | 1.05037200  |
| C | -4.20147900 | -2.02715400 | -0.58561600 |
| H | -4.11426100 | -2.23325500 | -1.65196400 |
| H | -4.06131200 | -2.95601800 | -0.02828900 |
| H | -5.20308800 | -1.65552200 | -0.36654600 |

*Cartesian coordinates of the optimized structure with C9-C12 distance constrained at 2.20 Å:*

|   |             |             |             |
|---|-------------|-------------|-------------|
| C | -0.24259500 | -1.11770100 | 1.09804900  |
| C | 0.09935600  | -0.19853800 | -0.08272700 |
| C | 1.00565200  | -0.97735200 | -1.03803400 |
| C | 2.31193500  | -1.37856200 | -0.35927800 |
| C | 2.18213400  | -1.85151900 | 0.97345800  |
| C | 1.00601100  | -1.63196200 | 1.81841800  |
| C | 0.79472900  | 1.11676400  | 0.41043800  |
| C | -0.14229000 | 2.30971700  | 0.03966400  |
| C | -1.51335100 | 1.62563200  | -0.09475100 |
| C | -1.17983500 | 0.31063400  | -0.80153800 |
| C | 3.07209800  | 0.03335500  | 0.26975100  |
| C | 2.22796200  | 1.23741100  | -0.10482500 |
| C | 0.24667400  | 2.99100100  | -1.27946500 |
| C | -0.14570300 | 3.36261500  | 1.14709100  |
| C | 3.30694200  | -2.08808200 | -1.25973400 |
| H | 1.33393400  | -0.97545200 | 2.63851700  |
| H | 0.82994000  | -2.59062700 | 2.32586300  |
| H | -0.80476700 | -1.97577600 | 0.72050900  |
| H | -0.88734300 | -0.60157300 | 1.80987200  |
| H | 3.04123600  | -2.35018900 | 1.42071300  |

## Supporting Information

|   |             |             |             |
|---|-------------|-------------|-------------|
| H | 3.23826900  | 0.01056000  | 1.35213200  |
| H | 4.04725000  | -0.02038400 | -0.20923300 |
| H | 1.23600900  | -0.39321500 | -1.93233100 |
| H | 4.21413800  | -2.35454100 | -0.71442900 |
| H | 2.85279500  | -2.99753700 | -1.65862900 |
| H | 3.57222500  | -1.43794500 | -2.09568900 |
| H | 2.71432200  | 2.11364300  | 0.33621900  |
| H | 2.24643300  | 1.36796200  | -1.18748200 |
| H | -0.88851800 | 0.55214900  | -1.82679200 |
| H | -2.23029800 | 2.22829900  | -0.65905800 |
| H | -1.93306300 | 1.42252000  | 0.89115600  |
| H | 1.21182300  | 3.49736400  | -1.19331700 |
| H | 0.31172900  | 2.29198200  | -2.11724400 |
| H | -0.50276200 | 3.74691400  | -1.53059700 |
| H | -0.46664700 | 2.92782500  | 2.09774600  |
| H | 0.85368100  | 3.78807300  | 1.28441800  |
| H | -0.82686200 | 4.18248500  | 0.89957900  |
| H | 0.84505000  | 1.07818000  | 1.50524100  |
| H | 0.50399500  | -1.89193000 | -1.37244000 |
| N | -2.26110900 | -0.65462900 | -0.95370100 |
| H | -2.32142900 | -1.11220500 | -1.85120200 |
| C | -3.22475800 | -0.96481200 | -0.04985900 |
| O | -3.29047100 | -0.48885100 | 1.07358900  |
| C | -4.23347100 | -1.98986400 | -0.52225400 |
| H | -4.18921800 | -2.17977500 | -1.59430700 |
| H | -4.04853200 | -2.92396300 | 0.01352800  |
| H | -5.23077900 | -1.64204900 | -0.25197800 |

*Cartesian coordinates of the optimized structure with C9-C12 distance constrained at 2.00 Å:*

|   |             |             |             |
|---|-------------|-------------|-------------|
| C | -0.25440100 | -1.20759500 | 1.01277400  |
| C | 0.08334500  | -0.21219400 | -0.10516400 |
| C | 1.01340600  | -0.91922900 | -1.09302800 |
| C | 2.28289200  | -1.41142300 | -0.42920000 |
| C | 2.20706100  | -1.83541900 | 0.90003200  |
| C | 0.99156400  | -1.71248200 | 1.74906600  |
| C | 0.75791400  | 1.07897300  | 0.46762700  |
| C | -0.11110700 | 2.29258000  | 0.02349100  |
| C | -1.49825900 | 1.64895700  | -0.13220800 |
| C | -1.19477200 | 0.31670300  | -0.82116700 |
| C | 3.01979800  | -0.04755900 | 0.52186700  |
| C | 2.23534400  | 1.17681100  | 0.09150700  |
| C | 0.35537900  | 2.90309200  | -1.30530900 |
| C | -0.11478700 | 3.38636400  | 1.08988800  |
| C | 3.35111500  | -1.93710200 | -1.35195800 |
| H | 1.24079000  | -1.09962700 | 2.62087700  |
| H | 0.82438400  | -2.71804200 | 2.15163500  |
| H | -0.77211000 | -2.06118600 | 0.56681000  |
| H | -0.94249400 | -0.75316800 | 1.72606400  |
| H | 3.06898500  | -2.34886700 | 1.32005100  |
| H | 3.05536700  | -0.10632200 | 1.61356300  |
| H | 4.03681200  | -0.12898400 | 0.15046600  |
| H | 1.27471800  | -0.27251300 | -1.93455100 |
| H | 4.22308500  | -2.28823200 | -0.79922100 |
| H | 2.93153900  | -2.77042800 | -1.92078800 |
| H | 3.65393300  | -1.16140700 | -2.05809300 |

## Supporting Information

|   |             |             |             |
|---|-------------|-------------|-------------|
| H | 2.69890700  | 2.02959700  | 0.59797500  |
| H | 2.36367700  | 1.32844000  | -0.98091400 |
| H | -0.91393800 | 0.53556000  | -1.85424700 |
| H | -2.18741500 | 2.26693400  | -0.71422200 |
| H | -1.93849600 | 1.46750200  | 0.84910500  |
| H | 1.31669500  | 3.41069500  | -1.18830400 |
| H | 0.46792900  | 2.16003500  | -2.09897800 |
| H | -0.37323800 | 3.64663400  | -1.64049600 |
| H | -0.48982800 | 3.00191500  | 2.04240300  |
| H | 0.89422600  | 3.77903800  | 1.25112300  |
| H | -0.75260700 | 4.22125900  | 0.78402500  |
| H | 0.69802500  | 1.02962600  | 1.56173500  |
| H | 0.51545300  | -1.80125600 | -1.51286800 |
| N | -2.29946800 | -0.62580200 | -0.94566300 |
| H | -2.38020800 | -1.09669700 | -1.83462700 |
| C | -3.25062000 | -0.91402000 | -0.02173600 |
| O | -3.29169100 | -0.42610700 | 1.09808300  |
| C | -4.28241400 | -1.92830100 | -0.46649300 |
| H | -4.24017500 | -2.15181600 | -1.53206200 |
| H | -4.12102000 | -2.84927800 | 0.09856800  |
| H | -5.27194300 | -1.54887800 | -0.20999200 |

*Cartesian coordinates of the optimized structure with the C9-C12 distance constrained at 1.80 Å:*

|   |             |             |             |
|---|-------------|-------------|-------------|
| C | -0.26532200 | -1.27762400 | 0.95105600  |
| C | 0.06161000  | -0.23816900 | -0.12682700 |
| C | 0.97684600  | -0.91983500 | -1.15011000 |
| C | 2.20288100  | -1.50509400 | -0.54206300 |
| C | 2.24619600  | -1.74123700 | 0.83631300  |
| C | 0.99427100  | -1.75392000 | 1.68811200  |
| C | 0.74077800  | 1.02482800  | 0.49737300  |
| C | -0.05219400 | 2.26240200  | -0.00762600 |
| C | -1.46336400 | 1.67742400  | -0.17562200 |
| C | -1.20992400 | 0.32078000  | -0.83707800 |
| C | 2.99410800  | -0.10402200 | 0.82410100  |
| C | 2.24764900  | 1.08507200  | 0.24639700  |
| C | 0.48152800  | 2.79700900  | -1.34369700 |
| C | -0.03179000 | 3.39230000  | 1.01954900  |
| C | 3.33374100  | -1.84347400 | -1.43846400 |
| H | 1.17596300  | -1.15913500 | 2.58615600  |
| H | 0.85824000  | -2.78354300 | 2.02716400  |
| H | -0.75009700 | -2.13166100 | 0.46933600  |
| H | -0.97828600 | -0.86283800 | 1.66386300  |
| H | 3.08188900  | -2.33518900 | 1.19612100  |
| H | 2.98845600  | -0.08070100 | 1.91435300  |
| H | 4.01142500  | -0.21477100 | 0.45987800  |
| H | 1.25314400  | -0.26350100 | -1.98052000 |
| H | 4.19025900  | -2.24162300 | -0.89716600 |
| H | 2.96309500  | -2.59954800 | -2.14009800 |
| H | 3.62034700  | -0.97229500 | -2.03353500 |
| H | 2.66862200  | 1.97158400  | 0.73185200  |
| H | 2.46315300  | 1.18040800  | -0.81979700 |
| H | -0.93850900 | 0.50836000  | -1.87872400 |
| H | -2.11655300 | 2.31317500  | -0.77949600 |
| H | -1.92399400 | 1.53283400  | 0.80248600  |
| H | 1.45202300  | 3.28286500  | -1.21095400 |

## Supporting Information

|   |             |             |             |
|---|-------------|-------------|-------------|
| H | 0.60557800  | 2.01296700  | -2.09548100 |
| H | -0.21069300 | 3.54322800  | -1.74403500 |
| H | -0.45048300 | 3.06030500  | 1.97365400  |
| H | 0.98953500  | 3.74429400  | 1.19572000  |
| H | -0.62116900 | 4.24403600  | 0.66653800  |
| H | 0.58591100  | 0.97596200  | 1.58246200  |
| H | 0.45086400  | -1.77837700 | -1.59661200 |
| N | -2.34525200 | -0.58842800 | -0.92572400 |
| H | -2.46518500 | -1.06120200 | -1.80901000 |
| C | -3.28114500 | -0.84012600 | 0.02410200  |
| O | -3.27636200 | -0.34578400 | 1.14204600  |
| C | -4.36602700 | -1.81103000 | -0.39035600 |
| H | -4.29302900 | -2.13039200 | -1.42945500 |
| H | -4.30800700 | -2.68557400 | 0.26078500  |
| H | -5.33389300 | -1.33610200 | -0.22275800 |

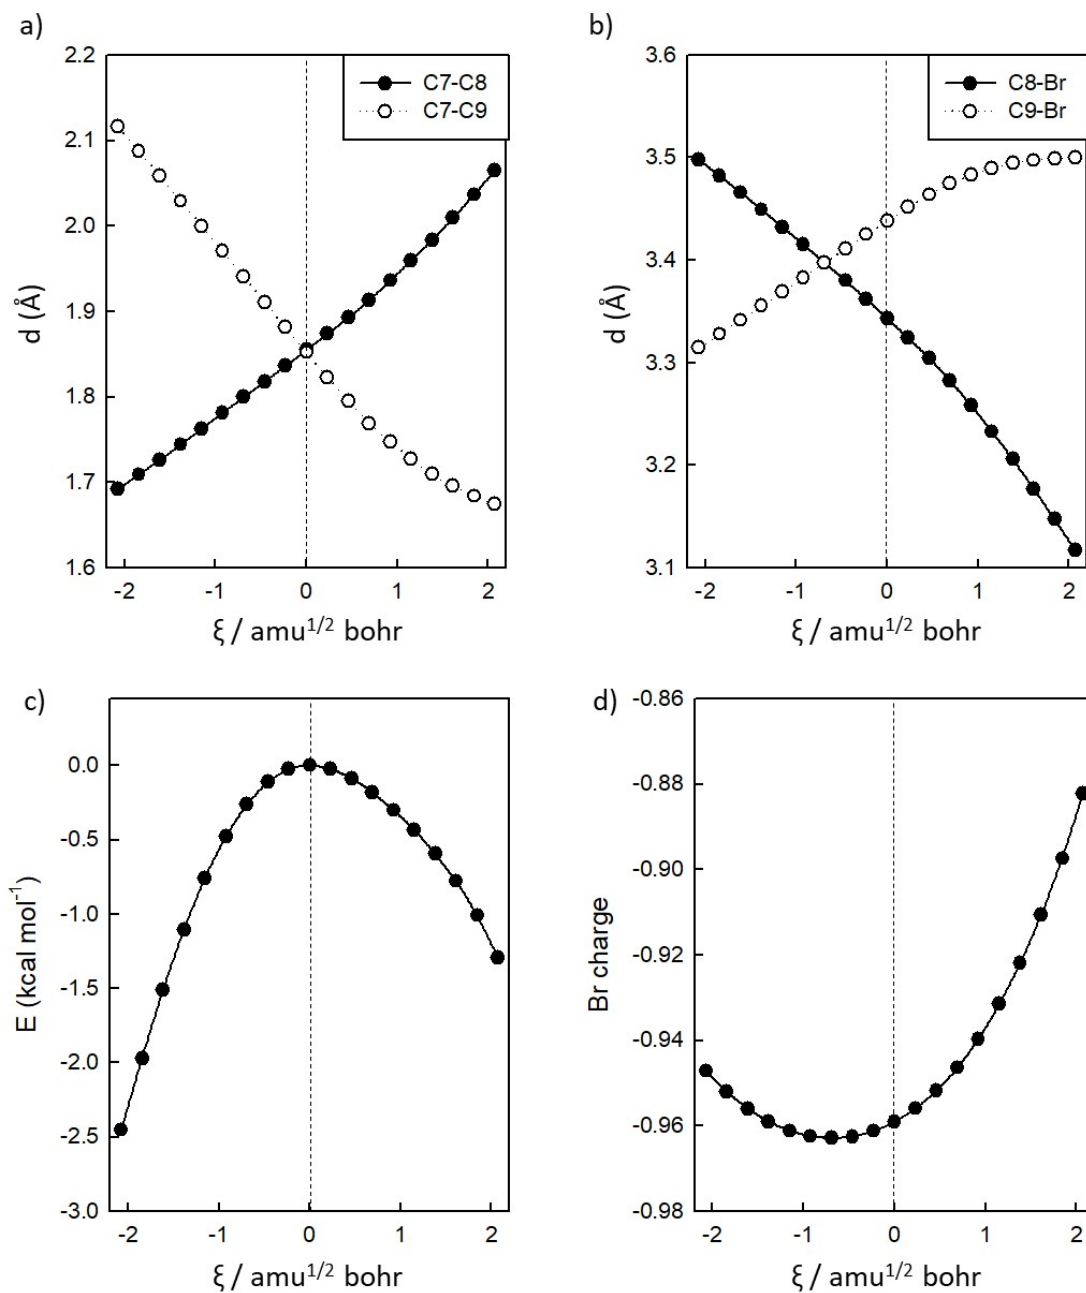

Figure S16. For transition state  $\text{TS}_{\text{dyo}}$  (reaction coordinate = 0) and the 9 previous and subsequent steps along the intrinsic reaction coordinate, evolution of (a) C7-C8 and C7-C9 distances, (b) Br-C8 and Br-C9 distances, (c) relative energy with respect to that of  $\text{TS}_{\text{dyo}}$ , (d) computed NBO charge of the bromide center.

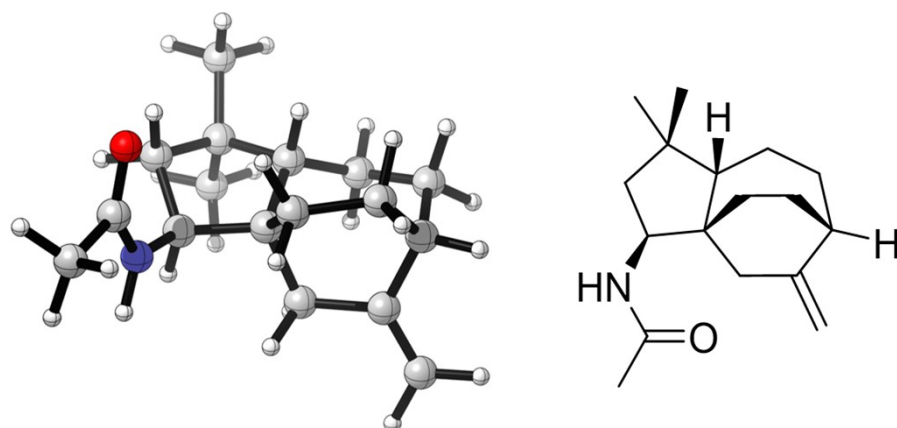

**Figure S17.** Optimized structure of the exocyclic isomer of 14.

**Cartesian coordinates and energetic data (a.u.) of the optimized species.****Compound 14**

E= -793.937755097  
G correction = 0.371322  
D3(0) correction = -0.00350286  
C -0.699123 1.064494 -0.488847  
C -0.087530 -0.233805 0.163660  
C -1.025853 -0.914433 1.140181  
C -2.125804 -1.516553 0.681620  
C -2.945318 0.010902 -1.128666  
C -2.220991 1.161306 -0.418313  
C -2.393196 -1.401596 -0.804800  
C -1.113551 -1.726102 -1.618203  
C 0.194565 -1.267218 -0.943812  
C 0.064700 2.262380 0.131826  
C 1.472046 1.671650 0.299871  
C 1.208019 0.277336 0.872970  
C -3.135778 -2.214942 1.542144  
C -0.521761 2.677666 1.487814  
C 0.079119 3.473903 -0.798011  
H -1.211945 -1.267690 -2.606246  
H -1.069895 -2.805669 -1.781963  
H 0.697939 -2.124232 -0.488028  
H 0.884804 -0.842404 -1.675375  
H -0.785819 -0.915574 2.202538  
H -4.121531 -1.749342 1.431623  
H -3.246466 -3.261446 1.238851  
H -2.856216 -2.185556 2.597308  
H -2.545010 2.110413 -0.858829  
H -2.531349 1.181771 0.629341  
H 0.964992 0.400839 1.930647  
H 2.111288 2.270726 0.955360  
H 1.953364 1.588205 -0.675311  
H -1.486157 3.176465 1.359657  
H -0.680002 1.825516 2.155255  
H 0.152433 3.379811 1.987964  
H 0.521202 3.217730 -1.765246  
H -0.932957 3.851520 -0.972730  
H 0.666161 4.288512 -0.361675  
H -0.414409 1.039262 -1.549911  
N 2.344580 -0.638216 0.881570  
H 2.445668 -1.206751 1.709067  
C 3.241977 -0.860357 -0.108896  
O 3.240755 -0.283469 -1.187418  
C 4.276205 -1.922641 0.202027  
H 4.321448 -2.185340 1.258865  
H 4.030266 -2.817165 -0.375606  
H 5.251096 -1.566387 -0.131097  
H -4.005284 0.049930 -0.857088  
H -2.892997 0.152294 -2.213714  
H -3.165077 -2.122110 -1.090694

## Supporting Information

### Compound 14-exo

E= -793.935647992

G correction = 0.372632

D3(0) correction = -0.00356889

C -0.773258 1.054054 -0.426337  
C -0.108243 -0.225321 0.186594  
C -0.957155 -0.931166 1.258364  
C -2.147909 -1.681636 0.679433  
C -3.028086 -0.003001 -0.983080  
C -2.287881 1.123181 -0.253143  
C -2.438146 -1.418530 -0.781453  
C -1.162762 -1.657452 -1.626592  
C 0.147620 -1.262048 -0.913289  
C 0.014194 2.276683 0.116890  
C 1.432678 1.698217 0.234340  
C 1.202157 0.314215 0.844076  
C -2.879815 -2.518171 1.413342  
C -0.505289 2.750699 1.480875  
C -0.026686 3.451334 -0.858896  
H -1.263401 -1.103646 -2.564198  
H -1.113130 -2.715776 -1.895177  
H 0.598462 -2.147267 -0.451326  
H 0.872471 -0.876596 -1.632665  
H -1.297941 -0.216030 2.013551  
H -3.727647 -3.047638 0.988946  
H -2.655551 -2.697725 2.461547  
H -2.654209 2.085567 -0.626453  
H -2.540573 1.093754 0.811096  
H 0.987864 0.457731 1.906501  
H 2.096076 2.314608 0.848518  
H 1.871474 1.598055 -0.759275  
H -1.495604 3.204128 1.384016  
H -0.584892 1.940313 2.209694  
H 0.168138 3.509125 1.892055  
H 0.368527 3.160487 -1.836503  
H -1.049698 3.814985 -0.997185  
H 0.574217 4.286252 -0.484287  
H -0.566187 1.025461 -1.505217  
H -0.308477 -1.645880 1.779276  
N 2.343222 -0.596171 0.839497  
H 2.472743 -1.143301 1.677329  
C 3.227092 -0.821624 -0.162342  
O 3.202370 -0.259716 -1.248546  
C 4.277782 -1.868372 0.146075  
H 4.340908 -2.118346 1.205084  
H 4.034393 -2.772211 -0.417935  
H 5.243665 -1.504657 -0.204757  
H -4.070127 -0.012114 -0.648154  
H -3.040184 0.203657 -2.058876  
H -3.200590 -2.128383 -1.112851

### Compound 22<sup>+</sup>

E= -794.354165340

G correction = 0.382037

D3(0) correction = -0.00365571

## Supporting Information

C 0.234420 -1.282796 -0.934419  
C -0.057165 -0.235407 0.144992  
C -0.968453 -0.916254 1.171909  
C -2.183342 -1.507781 0.602834  
C -2.340308 -1.525118 -0.832326  
C -1.054464 -1.707551 -1.657945  
C -0.712716 1.037806 -0.488080  
C 0.060914 2.262309 0.070529  
C 1.473177 1.681222 0.239971  
C 1.224183 0.302589 0.857148  
C -2.968165 -0.052392 -1.008103  
C -2.230993 1.104881 -0.329376  
C -0.500704 2.747211 1.413808  
C 0.051724 3.426156 -0.918344  
C -3.245158 -2.005389 1.474302  
H -1.177544 -1.145671 -2.585287  
H -0.987970 -2.761170 -1.933622  
H 0.696538 -2.152464 -0.457779  
H 0.954330 -0.887174 -1.650511  
H -3.131588 -2.207877 -1.141484  
H -2.952587 0.069045 -2.093442  
H -4.006310 -0.089922 -0.677510  
H -1.247013 -0.286516 2.024843  
H -4.225893 -1.923312 1.001911  
H -3.034598 -3.086098 1.556083  
H -3.220836 -1.574047 2.473213  
H -2.604385 2.033912 -0.769255  
H -2.496626 1.141119 0.731604  
H 0.967892 0.455736 1.908145  
H 2.114990 2.301635 0.871418  
H 1.945701 1.569927 -0.736769  
H -1.477241 3.220414 1.280301  
H -0.622547 1.939580 2.140923  
H 0.172395 3.492316 1.847773  
H 0.481617 3.126037 -1.878082  
H -0.966937 3.785091 -1.094769  
H 0.637420 4.265127 -0.530272  
H -0.492757 1.000713 -1.562780  
H -0.443230 -1.779765 1.624748  
N 2.360281 -0.608758 0.900282  
H 2.500030 -1.102688 1.768880  
C 3.268317 -0.846889 -0.079849  
O 3.240964 -0.323457 -1.184063  
C 4.339331 -1.854393 0.278887  
H 4.373366 -2.090031 1.342321  
H 4.145856 -2.771262 -0.283111  
H 5.304655 -1.462927 -0.042595

### Compound (22+,Br-)

E= -3368.71037047

G correction = 0.375726

D3(0) correction = -0.00412601

C -0.078336 0.020401 1.585611

C -0.589696 -0.058343 0.142489

C -0.220879 1.277952 -0.508205

## Supporting Information

C -0.682668 2.448341 0.193298  
C -1.348743 2.276170 1.480176  
C -0.774463 1.148872 2.364548  
C -2.129369 -0.337338 0.109798  
C -2.349094 -1.470522 -0.928194  
C -1.064555 -2.295559 -0.756339  
C 0.041703 -1.241343 -0.662876  
C -2.834293 1.959710 1.004462  
C -2.987920 0.908996 -0.100830  
C -2.473815 -0.938997 -2.361946  
C -3.589769 -2.298353 -0.598880  
C -0.532663 3.784788 -0.384850  
Br 3.257480 1.056523 -0.790738  
H -1.597882 0.753027 2.962042  
H -0.066431 1.600150 3.061416  
H 1.000427 0.202291 1.553881  
H -0.233272 -0.936304 2.087073  
H -1.399128 3.219634 2.024285  
H -3.330506 1.625857 1.918624  
H -3.295832 2.897279 0.690555  
H -0.434091 1.368515 -1.580053  
H 0.305766 4.243229 0.164470  
H -0.301494 3.771989 -1.447948  
H -1.406258 4.402927 -0.159154  
H -4.043219 0.624572 -0.145675  
H -2.752630 1.360718 -1.069458  
H 0.238821 -0.873447 -1.674135  
H -0.895636 -2.994778 -1.580211  
H -1.113782 -2.861194 0.174122  
H -3.411430 -0.393355 -2.498438  
H -1.656253 -0.267761 -2.637809  
H -2.471574 -1.776097 -3.066299  
H -3.520511 -2.722153 0.406970  
H -4.497237 -1.688982 -0.653374  
H -3.700955 -3.123769 -1.308893  
H -2.391132 -0.762139 1.088027  
H 0.906621 1.398859 -0.487666  
N 1.341251 -1.694185 -0.186980  
H 2.113726 -1.097754 -0.478286  
C 1.597858 -2.529621 0.847507  
O 0.754608 -3.172637 1.460185  
C 3.062046 -2.617858 1.226677  
H 3.727030 -2.179237 0.482877  
H 3.197498 -2.088747 2.173761  
H 3.319867 -3.664996 1.387813

### TS20b

E= -3368.70633493  
G correction = 0.377262  
D3(0) correction = -0.00411906  
C -0.082755 0.233436 1.346116  
C 0.641962 -0.049672 0.024819  
C -0.274113 -0.982998 -0.770098  
C -0.666192 -2.190667 -0.077564  
C -0.270608 -2.353124 1.313464

## Supporting Information

C -0.282910 -1.059858 2.154807  
C 2.055619 -0.662483 0.296416  
C 3.058153 0.136852 -0.578505  
C 2.412662 1.532831 -0.585245  
C 0.927739 1.237851 -0.809429  
C 1.201128 -2.934037 1.115568  
C 2.115394 -2.181131 0.141053  
C 3.171058 -0.426706 -2.001398  
C 4.448837 0.169573 0.051753  
C -1.452110 -3.209557 -0.761892  
Br -3.641229 -0.065139 -0.444647  
H 0.488848 -1.163150 2.920440  
H -1.242284 -1.015179 2.673070  
H -1.058432 0.670515 1.116302  
H 0.481399 0.961353 1.930369  
H -0.843807 -3.145166 1.795440  
H 1.617293 -2.905817 2.125314  
H 1.115442 -3.978950 0.813005  
H 0.038332 -1.204383 -1.795983  
H -2.483372 -2.822405 -0.625770  
H -1.263605 -3.249895 -1.834201  
H -1.396118 -4.184870 -0.279632  
H 3.138651 -2.528744 0.310644  
H 1.864628 -2.458830 -0.887388  
H 0.803585 0.975536 -1.863021  
H 2.823447 2.187487 -1.358990  
H 2.554829 2.008467 0.385568  
H 3.684307 -1.392176 -1.998483  
H 2.198909 -0.571804 -2.480453  
H 3.754595 0.257118 -2.624951  
H 4.412079 0.601460 1.055864  
H 4.871009 -0.837434 0.126141  
H 5.132367 0.773032 -0.553586  
H 2.303666 -0.425920 1.339476  
H -1.287843 -0.499748 -0.881607  
N -0.006380 2.337067 -0.606757  
H -0.822143 2.328053 -1.202599  
C -0.022823 3.237583 0.408395  
O 0.839246 3.321484 1.271123  
C -1.232941 4.147066 0.416227  
H -1.694102 4.248739 -0.566467  
H -1.970995 3.725816 1.104621  
H -0.935581 5.125651 0.790920

### TS20c

E= -3368.70363987  
G correction = 0.378439  
D3(0) correction = -0.00406803  
C -1.493657 -1.307646 0.999929  
C -0.794247 -0.238735 0.148834  
C 0.371589 -0.958832 -0.536114  
C 1.179820 -1.795381 0.342468  
C 0.961002 -1.685531 1.781274  
C -0.558076 -1.806835 2.111406  
C -0.357231 0.960863 1.054230

## Supporting Information

C -0.819710 2.253089 0.328488  
C -2.105835 1.773679 -0.361813  
C -1.716343 0.408079 -0.931814  
C 1.552071 -0.296821 2.236958  
C 1.116624 0.942707 1.449645  
C 0.207671 2.743257 -0.700906  
C -1.106667 3.380076 1.318451  
C 2.141196 -2.742184 -0.203129  
Br 3.814577 0.194223 -1.110545  
H -0.723148 -1.246675 3.033736  
H -0.768214 -2.855194 2.327214  
H -1.779335 -2.140365 0.348979  
H -2.409643 -0.904336 1.431749  
H 1.525197 -2.454477 2.309461  
H 1.244522 -0.220948 3.283156  
H 2.641286 -0.370997 2.209627  
H 1.126592 -0.288392 -0.999527  
H 3.034610 -2.801242 0.421536  
H 1.624667 -3.714439 -0.093541  
H 2.379565 -2.564360 -1.248266  
H 1.336517 1.818451 2.069008  
H 1.747974 1.030579 0.562330  
H -1.097455 0.586568 -1.814476  
H -2.452106 2.458453 -1.141015  
H -2.899011 1.654797 0.377400  
H 1.090722 3.155739 -0.205846  
H 0.556158 1.949861 -1.367844  
H -0.231910 3.535535 -1.314453  
H -1.866864 3.078093 2.044629  
H -0.202359 3.663753 1.865463  
H -1.470557 4.269677 0.794807  
H -0.961960 0.895679 1.968180  
H 0.036636 -1.586403 -1.377000  
N -2.803110 -0.429092 -1.426757  
H -2.648889 -0.872681 -2.319596  
C -4.011949 -0.640757 -0.849584  
O -4.353352 -0.169585 0.225874  
C -4.948492 -1.532348 -1.636940  
H -4.541418 -1.858067 -2.593817  
H -5.179943 -2.407373 -1.026461  
H -5.879830 -0.988825 -1.804379

### Compound 20

E= -3368.74958581  
G correction = 0.383789  
D3(0) correction = -0.00403291  
C -0.050803 0.634514 1.020976  
C 0.602249 -0.184276 -0.105949  
C -0.494938 -0.587931 -1.094596  
C -1.542055 -1.485545 -0.414397  
C -2.190568 -0.718441 0.750933  
C -1.171482 -0.132714 1.721918  
C 1.332707 -1.449947 0.461994  
C 2.851695 -1.301244 0.130423  
C 3.005831 0.219784 -0.039636

## Supporting Information

C 1.740226 0.612549 -0.802568  
C -0.838533 -2.738961 0.219172  
C 0.677872 -2.752936 -0.002892  
C 3.262479 -2.026677 -1.158284  
C 3.717262 -1.826051 1.275651  
C -2.573238 -1.960365 -1.436977  
Br -3.364681 0.777286 0.101747  
H -0.750659 -0.968572 2.289423  
H -1.676570 0.505939 2.448516  
H -0.463585 1.553849 0.592243  
H 0.703354 0.935430 1.752169  
H -2.906975 -1.357630 1.266624  
H -1.045864 -2.794782 1.291544  
H -1.273423 -3.641181 -0.218073  
H -0.062976 -1.122049 -1.947298  
H -3.374558 -2.525731 -0.950302  
H -3.021157 -1.124481 -1.977399  
H -2.088201 -2.617307 -2.164545  
H 1.116669 -3.604455 0.527033  
H 0.874138 -2.913852 -1.066052  
H 1.830606 0.216305 -1.817752  
H 3.919049 0.495356 -0.575540  
H 3.017897 0.709254 0.934871  
H 3.195153 -3.111343 -1.038815  
H 2.645380 -1.750893 -2.017304  
H 4.301810 -1.783249 -1.398596  
H 3.495583 -1.296066 2.206335  
H 3.541614 -2.894168 1.440514  
H 4.780891 -1.693080 1.053210  
H 1.250253 -1.415499 1.554864  
H -0.983886 0.308100 -1.494098  
N 1.501588 2.038541 -0.998202  
H 1.090182 2.296110 -1.882970  
C 1.714211 3.047665 -0.118346  
O 2.179395 2.901873 1.002626  
C 1.306459 4.418565 -0.617812  
H 1.133919 4.454225 -1.693437  
H 0.388311 4.709797 -0.101449  
H 2.084354 5.132268 -0.346103

### Compound 20a

E= -3368.75113304

G correction = 0.383770

D3(0) correction = -0.00396728

C 0.353567 -1.011804 -0.751561  
C 0.762625 0.082911 0.245851  
C -0.192029 0.003206 1.437505  
C -1.645821 0.320347 1.010635  
C -2.018935 -0.813802 0.044124  
C -1.115163 -0.896762 -1.176331  
C 0.714976 1.504991 -0.412321  
C 2.173802 2.065644 -0.421116  
C 3.024975 0.788502 -0.319068  
C 2.246486 -0.066761 0.681459  
C -1.701565 1.714464 0.316247

## Supporting Information

C -0.336643 2.407515 0.237690  
C 2.469333 2.996622 0.763029  
C 2.459414 2.826602 -1.715578  
C -2.530703 0.297305 2.256019  
Br -3.910987 -0.668642 -0.584475  
H -1.262013 -0.012302 -1.801595  
H -1.394285 -1.762674 -1.780022  
H 0.507602 -1.988229 -0.278518  
H 0.994060 -0.982166 -1.636238  
H -2.020918 -1.760704 0.586575  
H -2.109437 1.614104 -0.693380  
H -2.400278 2.355911 0.860142  
H 0.107005 0.709708 2.218385  
H -3.567604 0.538857 2.013708  
H -2.508727 -0.686983 2.734767  
H -2.169828 1.036297 2.977225  
H -0.431406 3.339605 -0.328610  
H -0.021574 2.687342 1.246418  
H 2.339191 0.407481 1.662316  
H 4.048834 0.988143 0.010905  
H 3.066651 0.283245 -1.284614  
H 1.892428 3.922492 0.691337  
H 2.240982 2.539541 1.729329  
H 3.530110 3.264768 0.759854  
H 2.313711 2.181817 -2.586894  
H 1.794262 3.690660 -1.815033  
H 3.490236 3.194778 -1.732696  
H 0.424010 1.373327 -1.461448  
H -0.152712 -0.999782 1.881248  
N 2.722832 -1.428798 0.899080  
H 2.694779 -1.757574 1.852575  
C 3.201236 -2.298332 -0.024445  
O 3.293426 -2.055829 -1.218938  
C 3.618635 -3.646512 0.525912  
H 3.615670 -3.693611 1.614589  
H 2.934019 -4.401472 0.132918  
H 4.617419 -3.876693 0.153005

### Compound 20b

E= -3368.74479806  
G correction = 0.384219  
D3(0) correction= -0.00407620  
C 0.066691 0.718931 1.122471  
C 0.508777 -0.132637 -0.071326  
C -0.694783 -0.247528 -1.026286  
C -2.033236 -0.575588 -0.327681  
C -1.832217 -1.037821 1.121455  
C -1.022682 -0.005546 1.937539  
C 1.059145 -1.508146 0.438636  
C 2.426150 -1.738727 -0.260715  
C 2.945611 -0.298931 -0.394823  
C 1.712833 0.480601 -0.855836  
C -1.200055 -2.451597 1.170005  
C 0.067268 -2.662097 0.331494  
C 2.282564 -2.404852 -1.635752

## Supporting Information

C 3.359742 -2.588234 0.599862  
C -2.888372 -1.525326 -1.150256  
Br -3.137190 1.140007 -0.222749  
H -0.571827 -0.525177 2.786605  
H -1.706771 0.735944 2.354834  
H -0.319474 1.672720 0.749770  
H 0.926600 0.946659 1.754862  
H -2.821675 -1.133064 1.577511  
H -0.971863 -2.650767 2.221614  
H -1.950044 -3.189825 0.872028  
H -0.505945 -1.020966 -1.776942  
H -3.842493 -1.727077 -0.659463  
H -3.080570 -1.111168 -2.141709  
H -2.354930 -2.471258 -1.278605  
H 0.550423 -3.588650 0.659371  
H -0.202541 -2.818806 -0.716561  
H 1.556420 0.245750 -1.912118  
H 3.777593 -0.208561 -1.099651  
H 3.273704 0.066045 0.579258  
H 1.955714 -3.443349 -1.533995  
H 1.563938 -1.895220 -2.282456  
H 3.249939 -2.410621 -2.147449  
H 3.519713 -2.124128 1.577314  
H 2.947463 -3.589491 0.759485  
H 4.334354 -2.704066 0.114971  
H 1.293274 -1.372494 1.503114  
H -0.787494 0.692709 -1.575263  
N 1.814708 1.936016 -0.832004  
H 1.402218 2.418666 -1.616471  
C 2.355270 2.717230 0.135135  
O 2.877139 2.293061 1.156530  
C 2.249957 4.206179 -0.122138  
H 2.023802 4.450276 -1.159979  
H 1.457961 4.606734 0.515825  
H 3.188108 4.676887 0.171389

### Compound 20c

E= -3368.74403229  
G correction = 0.384430  
D3(0) correction= -0.00406571  
C -0.813154 -1.015697 1.191609  
C -0.607439 -0.035578 0.033882  
C 0.598308 -0.536322 -0.791430  
C 1.788608 -1.005297 0.078516  
C 1.711091 -0.468624 1.515374  
C 0.397009 -1.001941 2.149454  
C -0.442622 1.418474 0.592126  
C -1.396108 2.330781 -0.225805  
C -2.554791 1.368067 -0.527525  
C -1.844361 0.069954 -0.915820  
C 1.847079 1.060366 1.651062  
C 1.002124 1.896313 0.685568  
C -0.753660 2.846208 -1.520675  
C -1.868001 3.528610 0.596545  
C 1.927177 -2.523720 0.068467

## Supporting Information

Br 3.506091 -0.333779 -0.765600  
H 0.177285 -0.377874 3.018707  
H 0.565778 -2.011567 2.530909  
H -0.957892 -2.019018 0.777808  
H -1.727952 -0.766120 1.731473  
H 2.543375 -0.909749 2.072003  
H 1.577466 1.314848 2.681172  
H 2.897376 1.334663 1.525836  
H 0.903524 0.234528 -1.497853  
H 2.767086 -2.848513 0.685429  
H 1.012076 -2.974826 0.461723  
H 2.071036 -2.891953 -0.948421  
H 1.020266 2.939918 1.017877  
H 1.464824 1.884346 -0.305243  
H -1.453991 0.204355 -1.927897  
H -3.214570 1.729126 -1.322144  
H -3.148317 1.212312 0.374343  
H 0.048240 3.556659 -1.302022  
H -0.327553 2.046654 -2.131620  
H -1.503278 3.367175 -2.124331  
H -2.363966 3.201081 1.514767  
H -1.027829 4.173667 0.872112  
H -2.577781 4.134679 0.024446  
H -0.851072 1.405563 1.612001  
H 0.263447 -1.392360 -1.389137  
N -2.677717 -1.123330 -1.018804  
H -2.493181 -1.722027 -1.809467  
C -3.661188 -1.525054 -0.177387  
O -3.998746 -0.919942 0.830463  
C -4.341926 -2.821797 -0.564330  
H -4.020182 -3.215321 -1.528387  
H -4.132667 -3.560244 0.212581  
H -5.419636 -2.653359 -0.580515

### TS<sub>dvo</sub>

E= -3368.70064385  
G correction = 0.376690  
D3(0) correction = -0.00407564  
C -0.107175 0.517698 1.067845  
C 0.681274 -0.123673 -0.080847  
C -0.329793 -0.763601 -1.033194  
C -1.209267 -1.772264 -0.345891  
C -1.456347 -1.634473 1.013446  
C -0.921440 -0.512797 1.855817  
C 1.693841 -1.187693 0.455354  
C 3.096562 -0.803560 -0.097131  
C 2.968561 0.722779 -0.233662  
C 1.573430 0.906851 -0.834636  
C -0.157670 -2.912499 0.666042  
C 1.247338 -2.617087 0.152510  
C 3.393456 -1.447278 -1.407726  
N 1.056465 2.267683 -0.900632  
H 0.503935 2.485647 -1.716961  
C 1.143507 3.240362 0.041613  
O 1.741195 3.122909 447278 -1.458177

## Supporting Information

C 4.203764 -1.189162 0.881802  
C -2.088072 -2.609061 -1.222574  
Br -3.751530 0.528969 -0.094707  
H -0.358438 -0.930892 2.694704  
H -1.810036 -0.035026 2.275806  
H -0.803143 1.246930 0.645194  
H 0.571846 1.046235 1.738865  
H -2.239671 -2.251039 1.444140  
H -0.144364 -2.952821 1.758341  
H -0.588846 -3.845238 0.315668  
H 0.157089 -1.225939 -1.896571  
H -2.670627 -3.328334 -0.646028  
H -2.777600 -1.914771 -1.711579  
H -1.500010 -3.126826 -1.983312  
H 1.916670 -3.334159 0.637186  
H 1.283758 -2.817029 -0.919418  
H 1.620033 0.589002 -1.879100  
H 3.751268 1.158844 -0.860776  
H 3.012498 1.189146 0.751234  
H 3.548267 -2.525003 -1.357312  
H 2.589588 -1.295125 -2.183139  
H 4.309604 -1.018559 -1.874617  
H 4.053073 -0.706070 1.851250  
H 4.229161 -2.272311 1.038185  
H 5.182396 -0.884791 0.497900  
H 1.744520 -1.077233 1.545489  
H -1.026752 -0.002583 1.101282  
C 0.401107 4.514221 -0.303658  
H 0.278504 4.656811 -1.377634  
H -0.589752 4.467545 0.156654  
H 0.937323 5.360028 0.124497
